# Supplementary material for: Biomanufacturing for Space-Exploration – What to Take and When to Make
Source: Preprints.org preprint supplement (doi:10.20944/preprints202207.0329.v1), 2022-07-21
Supplement: Supplementary file 1 [file supplementary]

## Sheet: inventory
			Mass, kg	Volume, m3	Power, watts	Cooling, watts	Crew time, MMH/yr	References/note	composition	components	reference	Category, % by mass			class fractions
System	Subsystem	Item	BM	BV	BP	BT	CT								fraction Structural Metal	fraction Plastic	fraction Electronics	fraction Fabric	fraction Glass	fraction Rubber	fraction Ceramics	fraction Gas	fraction Food	fraction Water	fraction Other	Total	System	Subsystem
Total			3725.18	9.32109	5698.89	4490.27	211.946
Air			1132.5	1.09417	2753.31	1684.06	1.37096																				Air
	APC		42.4	0.08763	23.5	23.5	0																				Air	APC
		Vent/Relief Valve	5.4	0.0141	0	0	0	1 (p. 9), 5 (p. 72)	brass, plastic, aluminum			100% metal			1	0	0	0								1	Air	APC
		Pressure control panel	11.2	0.034	18	18	0	1 (p. 9), 5 (p. 72)		main circuit breakers, surge arresters, transformers, terminal blocks, programming logic controllers, relays and contactors, network switches, video monitors, joysticks, buttons, keyboars					0.2	0.1	0.7	0								1	Air	APC
		Manual Pressure Equalization Valve	9.6	0.0112	0	0	0	1 (p. 9), 5 (p. 72)	nickel plated DZR brass			100% metal			1	0	0	0								1	Air	APC
		Positive Pressure Relief Valve	1.8	0.0034	0	0	0	1 (p. 9), 5 (p. 72)	brass, plastic, aluminum			100% metal			1	0	0	0								1	Air	APC
		Negative Pressure Relief Valve	3	0.0093	0	0	0	1 (p. 9), 5 (p. 72)	brass, plastic, aluminum			100% metal			1	0	0	0								1	Air	APC
		Nitrogen Interface Assembly	7.5	0.0122	5.5	5.5	0	1 (p. 9), 5 (p. 72)	brass, plastic, aluminum			100% metal			1	0	0	0								1	Air	APC
		Vacuum Access Jumper 5-ft	0.7	0.00043	0	0	0	1 (p. 9), 5 (p. 72)		circuit	https://www.nasa.gov/sites/default/files/files/Section_J-5.pdf	100% electrical components			0	0	1	0								1	Air	APC
		Vacuum Access Jumper 35-ft	3.2	0.003	0	0	0	1 (p. 9), 5 (p. 72)		circuit	https://www.nasa.gov/sites/default/files/files/Section_J-5.pdf	100% electrical components			0	0	1	0								1	Air	APC
	ACMA		54.3	0.0897	103.5	103.5	0																				Air	ACMA
		Verification Gas Assembly	5.4	0.0136	0.1	0.1	0	5 (p. 74)		gas, tank, valve	https://ntrs.nasa.gov/api/citations/20170005402/downloads/20170005402.pdf				0.5							0.5				1	Air	ACMA
		Mass Spectrometer	13.9	0.0238	31.8	31.8	0	5 (p. 74)		the ion source, the analyzer, and the detector system		50% metal, 50% electrical components			0.5		0.5									1	Air	ACMA
		Sample Pump	3.4	0.0045	4	4	0	5 (p. 74)	steel			100% metal components			1											1	Air	ACMA
		Sample Distributor	2.1	0.0045	0.1	0.1	0	5 (p. 74)	brass, plastic, aluminum, paper	valve, pump, filter		95% metal, 5% filter			0.95			0.05								1	Air	ACMA
		Data & Control	8	0.0141	34.9	34.9	0	5 (p. 74)		circuit board		50% metal, 50% electrical components			0.5		0.5									1	Air	ACMA
		Low Volt. Power supply	5.7	0.0054	30.8	30.8	0	5 (p. 74)	glass epoxy, polyviride, beryllium oxide, filled epoxy, silicone rubber			70% metal, 10% epoxy, 10% rubber, 10% ceramics			0.7					0.1	0.1				0.1	1	Air	ACMA
		Chassis	15.8	0.0238	0	0	0	5 (p. 74)	iron, nickel		https://www.nasa.gov/image-feature/jpl/chassis-of-nasa-s-psyche-spacecraft-docks-safelyChassis of NASA's Psyche Spacecraft Docks Safelyhttps://www.nasa.gov › image-feature › jpl › chassis-of-...	100% metal			1											1	Air	ACMA
		Inlet Valve Assembly	0	0	0	0	0	5 (p. 74)	metal, fluid, fabric	barrier, sealing, and porous elements. Fluid flows through. Mostly metal	https://ntrs.nasa.gov/citations/19780017483	90% metal, 9% fluid, 1% fabric			0.9			0.01						0.09		1	Air	ACMA
		EMI Filter	0	0	1.8	1.8	0	5 (p. 74)	metal, plastic		https://store.astrodynetdi.com/media/assets/product/documents/A2T-Datasheet.pdf	98% metal, 2% plastic			0.98	0.02										1	Air	ACMA
	SDS		35.11	0.04134	0	0	0																				Air	SDS
		3-way solenoid valves	31.5	0.0345	0	0	0	5 (p. 75)	nickel, brass		https://ntrs.nasa.gov/api/citations/19730010173/downloads/19730010173.pdf	100% metal			1											1	Air	SDS
		Manual valves	2.53	0.0066	0	0	0	5 (p. 75)	brass, plastic, aluminum			100% metal			1											1	Air	SDS
		Sample probes	1.08	0.00024	0	0	0	5 (p. 75)	stainless steel		https://welker.com/products/sample-probe/	100% metal			1											1	Air	SDS
	CO2_removal_4BMS		135.438	0.288402	681.185	681.185	1.34137																				Air	CO2_removal_4BMS
		Air Selector Valve	12.8105	0.00837611	0.701979	0.701979	0.986301	5 (p.132), 1 (p. 7), 5 (p. 132)	metal + air (atomsphere + CO2)		5	90% metal, 10% air			0.9							0.1				1	Air	CO2_removal_4BMS
		Desiccant Bed	24.2885	0.248501	0	0	0.236712	5 (p. 132), 1 (p. 7),	stainless steel, 13X zeolite (ceramic beads)		https://www.novatec.com/products/dry/dual-bed-desiccant/	40% stainless steel, 60% desiccant			0.4						0.6					1	Air	CO2_removal_4BMS
		Adsorbent Bed	33.1334	0	578.431	578.431	0	5 (p.132), 1 (p. 7), 5 (p. 132)	ceramic beads, structural metal, metal casing, carbon fibre composite molecular sieves (adsorbing material)		source 5, https://journals.sagepub.com/doi/pdf/10.1260/0263617011494141	30% ceramic beads, 50% metal, 20% fiber			0.5			0.2			0.3					1	Air	CO2_removal_4BMS
		Air Check Valve	0.164237	0	0	0	0	5 (p.132)	spring (metal), metal structural components			100% metal			1											1	Air	CO2_removal_4BMS
		Heater Controller	6.6	0.0016	38	38	0.00986301	5 (p.132), 1 (p. 7), 5 (p. 132)	power input (electrical + metal), heater interface	power input: mass is probably mostly metal. Generally: mostly metal	5	80% metal, 20% electrical components			0.8		0.2									1	Air	CO2_removal_4BMS
		Air Blower	0.821187	0.0205297	40.7148	40.7148	0.0641096	5 (p.132), 1 (p. 7), 5 (p. 132)	motor, motor sensor	all metal. Some foil (vanes). But all metal	5	100% metal			1											1	Air	CO2_removal_4BMS
		Precooler	2.21721	0	0	0	0	0	stainless steel housing and plate fin		5	100% stainless steel			1											1	Air	CO2_removal_4BMS
		Blower/precooler Motor Controller	1.3	0	5	5	0	5 (p.132), 1 (p. 7), 5 (p. 132)	electrical component, metal casing		5	60% metal, 40% electrical components			0.6		0.4									1	Air	CO2_removal_4BMS
		CO2 Pump	6.73374	0.00369534	13.3376	13.3376	0.0394521	5 (p.132), 1 (p. 7), 5 (p. 132)	steel + zinc coating		https://www.amazon.com/CXWXC-CO2-Inflator-x16g-Cartridges/dp/B08HH84HRL	99% steel, 1% coating			0.99										0.01	1	Air	CO2_removal_4BMS
		CO2 Pump Motor Controller	1.3	0.0057	2	2	0.00493151	5 (p.132), 1 (p. 7), 5 (p. 132)	electrical component, metal casing			70% electrical components, 30% metal casings			0.3		0.7									1	Air	CO2_removal_4BMS
		Temperature Sensor	0.399	0	1	1	0	5 (p.132), , 5 (p. 132)	glass casing, electrical wires		https://www.variohm.com/news-media/technical-blog-archive/what-is-a-temperature-sensor-	40% glass, 60% wires					0.6		0.4							1	Air	CO2_removal_4BMS
		Differential Pressure Sensor	0.2	0	1	1	0	5 (p.132), , 5 (p. 132)	electrical component, plastic casing, metal foil, metal wire		https://www.futek.com/differential-pressure-measurement-sensor	10% foil, 25% plastic casing, 65% electrical components			0.1	0.25	0.65									1	Air	CO2_removal_4BMS
		Absolute Pressure Sensor	0.2	0	1	1	0	5 (p.132), , 5 (p. 132)	polysilicon doped interconnect (metal), (silicon?) wafer, silicon casing		https://www.avnet.com/wps/portal/abacus/solutions/technologies/sensors/pressure-sensors/measurement-types/absolute/	75% metal, 25% ceramics			0.75						0.25					1	Air	CO2_removal_4BMS
		Electrical Harness	4.5	0	0	0	0	5 (p.132)	electric tape, aluminum or copper, plastic casing		https://workmanship.nasa.gov/lib/insp/2%20books/links/sections/401%20General%20Requirements.html	90% metal, 5% fabric, 5% plastic			0.9	0.05		0.05								1	Air	CO2_removal_4BMS
		Plumbing	4.84501	0	0	0	0	5 (p.132)	stainless steel			100% stainless steel			1											1	Air	CO2_removal_4BMS
		Support Structure	29.6449	0	0	0	0	5 (p.132)	stainless steel			100% stainless steel			1											1	Air	CO2_removal_4BMS
		Fluid Disconnects	1.97085	0	0	0	0	5 (p.132)	100% stainless steel		https://www.powermotiontech.com/technologies/hose-tubing/article/21128614/back-to-basics-quick-disconnects	100% stainless steel			1											1	Air	CO2_removal_4BMS
		Electronics coldplate	2.70992	0	0	0	0	5 (p.132)	100% aluminum		https://spwindustrial.com/semiconductor-cold-plate-liquid-cooled-aluminium-body-12x9-25-lot-of-2-used/	100% aluminum			1											1	Air	CO2_removal_4BMS
		Electronics Interface Plate	1.6	0	0	0	0	5 (p.132)	metal			100% metal			1											1	Air	CO2_removal_4BMS
	N2_storage		178.238	0	0	0	0																				Air	N2_storage
		MD Shield Instl	0	0	0	0	0	11			https://www.lpi.usra.edu/lpi/contribution_docs/LPI-001804.pdf	100% metal			1											1	Air	N2_storage
		Multilayer Insulation Assembly-T #1	0	0	0	0	0	11	metal		wiki article	100% metal			1											1	Air	N2_storage
		Multilayer Insulation Assembly-T #2	0	0	0	0	0	11	metal		wiki article	100% metal			1											1	Air	N2_storage
		Primary Structure Assembly -HPG ORU	0	0	0	0	0	11		tank		50% metal, 50% gas			0.5							0.5				1	Air	N2_storage
		Tank ORU Assembly	0	0	0	0	0	11		tank		100% metal			1											1	Air	N2_storage
		Utilities Installation - O2/N2 Tank	0	0	0	0	0	11				50% metal, 50% gas			0.5							0.5				1	Air	N2_storage
		N2 Bare Tank	80.3715	0	0	0	0	66 (Use max. allowable tank mass.)	100% aluminum 6061		https://www.beveragefactory.com/draftbeer/tanks/nitrogen/nitrogen_aluminum_air_tank_22.shtml	90% metal, 5% rubber			0.9					0.05		0.05				1	Air	N2_storage
		HPGA Fluid	81.7409	0	0	0	0	12 (page 84)	water??															1		1	Air	N2_storage
		Handhold, top mounted	0.215794	0	0	0	0	11	plastic	1		100% plastic				1										1	Air	N2_storage
		Handrail 21.941 in custom	0.377639	0	0	0	0	11	plastic	1		100% plastic				1										1	Air	N2_storage
		Handrail, top mounted	0.395622	0	0	0	0	11	plastic	1		100% plastic				1										1	Air	N2_storage
		Grapple fixture, flt releasable	11.1134	0	0	0	0	11	metal + electrical components			50% metal, 50% electrical			0.5		0.5									1	Air	N2_storage
		Accessories	4.02263	0	0	0	0	Use 5% of the tank mass	variable																	0	Air	N2_storage
	O2_storage		113.992	0	0	0	0																				Air	O2_storage
		MD Shield Instl	0	0	0	0	0	11			https://www.lpi.usra.edu/lpi/contribution_docs/LPI-001804.pdf	100% metal			1											1	Air	O2_storage
		Multilayer Insulation Assembly-T #1	0	0	0	0	0	11	metal		wiki article	100% metal			1											1	Air	O2_storage
		Multilayer Insulation Assembly-T #2	0	0	0	0	0	11	metal		wiki article	100% metal			1											1	Air	O2_storage
		Primary Structure Assembly -HPG ORU	0	0	0	0	0	11		tank		50% metal, 50% gas			0.5							0.5				1	Air	O2_storage
		Tank ORU Assembly	0	0	0	0	0	11		tank		100% metal			1											1	Air	O2_storage
		Utilities Installation - O2/N2 Tank	0	0	0	0	0	11				50% metal, 50% gas			0.5							0.5				1	Air	O2_storage
		O2 Bare Tank	56.0785	0	0	0	0	66 (Use max. allowable tank mass.)	aluminum		https://www.amazon.com/ICS-Industries-Medical-Oxygen-Cylinder/dp/B085LKBB62/ref=sr_1_5?keywords=medical+oxygen+tank&qid=1644356564&sr=8-5	95% metal, 5% O2			0.95							0.05				1	Air	O2_storage
		HPGA Fluid	48	0	0	0	0	12 (page 84)	water??	1		100% water												1		1	Air	O2_storage
		Handhold, top mounted	0.126719	0	0	0	0	66	plastic	1		100% plastic				1										1	Air	O2_storage
		Handrail 21.941 in custom	0.221758	0	0	0	0	66	plastic	1		100% plastic				1										1	Air	O2_storage
		Handrail, top mounted	0.232318	0	0	0	0	66	plastic	1		100% plastic				1										1	Air	O2_storage
		Grapple fixture, flt releasable	6.52601	0	0	0	0	66	metal + electrical components			50% metal, 50% electrical			0.5		0.5									1	Air	O2_storage
		Accessories	2.80675	0	0	0	0	Use 5% of the tank mass	variable																	0	Air	O2_storage
	CO2_reduction_sabatier		128.077	0.01184	133.6	133.6	0																				Air	CO2_reduction_sabatier
		Condensing Heat Exchanger	1.46872	0	0	0	0	26				90% metal, 10% electrical			0.9		0.1									1	Air	CO2_reduction_sabatier
		AAA heat exchanger	2.46536	0	0	0	0	26				100% metal			1											1	Air	CO2_reduction_sabatier
		ITCS Coolant Water Inlet QD	0.47209	0	0	0	0	26				100% metal			1											1	Air	CO2_reduction_sabatier
		ITCS Coolant Water Outlet QD	0.35669	0	0	0	0	26				100% metal			1											1	Air	CO2_reduction_sabatier
		Heat Exchanger Inlet Temp	0.363636	0	0	0	0	26			https://en.wikipedia.org/wiki/Shell_and_tube_heat_exchanger	100% metal			1											1	Air	CO2_reduction_sabatier
		Heat Exchanger Outlet Temp	0.363636	0	0	0	0	26			https://en.wikipedia.org/wiki/Shell_and_tube_heat_exchanger	100% metal			1											1	Air	CO2_reduction_sabatier
		Manifold, CO2	4.7209	0	0	0	0	26	aluminum, brass, plastic		https://www.amazon.com/Co2-Manifold-Outlet-C-Kraus/dp/B00838UH6I	95% metal, 5% plastic			0.95	0.05										1	Air	CO2_reduction_sabatier
		CO2 Inlet Check Valve	0.104909	0	0	0	0	26	brass, plastic		https://www.amazon.com/Co2-Manifold-Outlet-C-Kraus/dp/B00838UH6I	90% metal, 10% plastic			0.9	0.1										1	Air	CO2_reduction_sabatier
		CO2 Inlet Filter	0.0536359	0	0	0	0	26	bronze		https://www.micromatic.com/part-pid-3500138.html	100% bronze			1											1	Air	CO2_reduction_sabatier
		Pressure sensor, CO2 Inlet	0.409091	0	0	0	0	26	glass casing, electrical wires		https://www.variohm.com/news-media/technical-blog-archive/what-is-a-temperature-sensor-	40% glass, 60% electrical					0.6		0.4							1	Air	CO2_reduction_sabatier
		CO2 Inlet QD	0.47209	0	0	0	0	26				100% metal			1											1	Air	CO2_reduction_sabatier
		CO2 Inlet Regulator	0.917952	0	0	0	0	26	brass, glass, plastic			90% brass, 5% glass, 5% plastic			0.9	0.05			0.05							1	Air	CO2_reduction_sabatier
		CO2 Inlet NC Solenoid	0.47209	0	0	0	0	26	nickel, brass		https://ntrs.nasa.gov/api/citations/19730010173/downloads/19730010173.pdf	100% metal			1											1	Air	CO2_reduction_sabatier
		CO2 Inlet Flow Control	2.15063	0	0	0	0	26	brass, glass, plastic		https://www.travers.com/product/ameriflame-rf2480-580-flow-meter-97-000-931	85% brass, 10% glass, 5% plastic			0.85	0.05			0.1							1	Air	CO2_reduction_sabatier
		CO2 Flow Control Orifice	0.0524544	0	0	0	0	26				100% metal			1											1	Air	CO2_reduction_sabatier
		Delta P Sensor, Flow Sensor CO2	0.909091	0	0	0	0	26	glass casing, electrical wires		https://www.variohm.com/news-media/technical-blog-archive/what-is-a-temperature-sensor-	40% glass, 60% electrical					0.6		0.4							1	Air	CO2_reduction_sabatier
		CO2 Flow Meter Orifice	0.0262272	0	0	0	0	26				100% metal			1											1	Air	CO2_reduction_sabatier
		Manifold, Hydrogen	4.37994	0	0	0	0	26	aluminum, brass, plastic		https://www.amazon.com/Co2-Manifold-Outlet-C-Kraus/dp/B00838UH6I	95% metal, 5% plastic			0.95	0.05										1	Air	CO2_reduction_sabatier
		Water Outlet Quick Disconnect	0.47209	0	0	0	0	26				100% metal			1											1	Air	CO2_reduction_sabatier
		Hydrogen Inlet Check Valve	0.104909	0	0	0	0	26	brass, plastic		https://www.amazon.com/Co2-Manifold-Outlet-C-Kraus/dp/B00838UH6I	90% metal, 10% plastic			0.9	0.1										1	Air	CO2_reduction_sabatier
		Hydrogen Inlet Filter	0.0536359	0	0	0	0	26	bronze		https://www.micromatic.com/part-pid-3500138.html	100% bronze			1											1	Air	CO2_reduction_sabatier
		H2O Outlet Pressure Sensor	0.818182	0	0	0	0	26	glass casing, electrical wires		https://www.variohm.com/news-media/technical-blog-archive/what-is-a-temperature-sensor-	40% glass, 60% electrical					0.6		0.4							1	Air	CO2_reduction_sabatier
		Hydrogen Inlet Quick Disconnect	0.47209	0	0	0	0	26				100% metal			1											1	Air	CO2_reduction_sabatier
		Hydrogen Inlet NC Solenoid	0.944179	0	0	0	0	26	nickel, brass		https://ntrs.nasa.gov/api/citations/19730010173/downloads/19730010173.pdf	100% metal			1											1	Air	CO2_reduction_sabatier
		Delta P Sensor, Flow Sensor H2	0.909091	0	0	0	0	26	glass casing, electrical wires		https://www.variohm.com/news-media/technical-blog-archive/what-is-a-temperature-sensor-	40% glass, 60% electrical					0.6		0.4							1	Air	CO2_reduction_sabatier
		H2 Flow Meter Orifice	0.0262272	0	0	0	0	26				100% metal			1											1	Air	CO2_reduction_sabatier
		Manifold, Vent	5.06185	0	0	0	0	26	aluminum, brass, plastic		https://www.amazon.com/Co2-Manifold-Outlet-C-Kraus/dp/B00838UH6I	95% metal, 5% plastic			0.95	0.05										1	Air	CO2_reduction_sabatier
		Liquid Sensor	1.09091	0	0	0	0	26	Polysulphone , electrical components		https://www.sparkfun.com/products/13835	50% plastic, 50% electrical				0.5	0.5									1	Air	CO2_reduction_sabatier
		Vent Pressure Sensor	0.818182	0	0	0	0	26	glass casing, electrical wires		https://www.variohm.com/news-media/technical-blog-archive/what-is-a-temperature-sensor-	40% glass, 60% electrical					0.6		0.4							1	Air	CO2_reduction_sabatier
		Vent Outlet Quick Disconnect	0.47209	0	0	0	0	26				100% metal			1											1	Air	CO2_reduction_sabatier
		Vent Regulator	0.917952	0	0	0	0	26	brass, glass, plastic			90% brass, 5% glass, 5% plastic			0.9	0.05			0.05							1	Air	CO2_reduction_sabatier
		Vent Relief/Check #1	0.157363	0	0	0	0	26				100% metal			1											1	Air	CO2_reduction_sabatier
		Vent Relief/Check #2	0.157363	0	0	0	0	26				100% metal			1											1	Air	CO2_reduction_sabatier
		Vent Outlet NO Solenoid	0.944179	0	0	0	0	26	nickel, brass		https://ntrs.nasa.gov/api/citations/19730010173/downloads/19730010173.pdf	100% metal			1											1	Air	CO2_reduction_sabatier
		Water Pressure Sensor	0.818182	0	0	0	0	26	glass casing, electrical wires		https://www.variohm.com/news-media/technical-blog-archive/what-is-a-temperature-sensor-	40% glass, 60% wires					0.6		0.4							1	Air	CO2_reduction_sabatier
		Water Relief	0.157363	0	0	0	0	26				100% metal			1											1	Air	CO2_reduction_sabatier
		Water Outlet NC Solenoid	0.47209	0	0	0	0	26	nickel, brass		https://ntrs.nasa.gov/api/citations/19730010173/downloads/19730010173.pdf	100% metal			1											1	Air	CO2_reduction_sabatier
		Rotary Water Separator Assembly	4.03899	0	22.6625	22.6625	0	26, 27				100% metal			1											1	Air	CO2_reduction_sabatier
		Sabatier Reactor Assembly	2.51781	0	3.23749	3.23749	0	26, 27	electrical components, metal			90% metal, 10% electrical			0.9		0.1									1	Air	CO2_reduction_sabatier
		Structure (A/R)	9.15329	0	0	0	0	26				100% metal			1											1	Air	CO2_reduction_sabatier
		Miscellaneous Hardware (Clampts, bolts, etc.) (A/R)	1.77273	0	0	0	0	26				100% metal			1											1	Air	CO2_reduction_sabatier
		Air Cooling NC Solenoid	0.629453	0	0	0	0	26	nickel, brass		https://ntrs.nasa.gov/api/citations/19730010173/downloads/19730010173.pdf	100% metal			1											1	Air	CO2_reduction_sabatier
		Air Inlet Filter	0.107272	0	0	0	0	26	bronze		https://www.micromatic.com/part-pid-3500138.html	100% bronze			1											1	Air	CO2_reduction_sabatier
		Air Sabatier Orifice	0.0524544	0	0	0	0	26				100% metal			1											1	Air	CO2_reduction_sabatier
		Heat Exchanger Inlet Duct	0.104909	0	0	0	0	26	steel, aluminum		https://ventilation-system.com/series/pr-for-rectangular-ducts	100% metal			1											1	Air	CO2_reduction_sabatier
		Heat Exchanger Outlet Duct	0.104909	0	0	0	0	26	steel, aluminum		https://ventilation-system.com/series/pr-for-rectangular-ducts	100% metal			1											1	Air	CO2_reduction_sabatier
		Reactor Inlet Duct	0.209818	0	0	0	0	26				100% metal			1											1	Air	CO2_reduction_sabatier
		Reactor Outlet Duct	0.104909	0	0	0	0	26				100% metal			1											1	Air	CO2_reduction_sabatier
		Tubing (A/R)	0.681907	0	0	0	0	26				100% metal			1											1	Air	CO2_reduction_sabatier
		Harnesses	11.4545	0	0	0	0	26	electric tape, aluminum or copper, plastic casing		https://workmanship.nasa.gov/lib/insp/2%20books/links/sections/401%20General%20Requirements.html	90% metal, 5% fabric, 5% plastic			0.9	0.05		0.05								1	Air	CO2_reduction_sabatier
		Valves & Sensors' total power	0	0	7.37494	7.37494	0	26				100% electrical					1									1	Air	CO2_reduction_sabatier
		Mechanical Compressor ORU	18.8836	0	45.3249	45.3249	0	27	some kinda metal + fiberglass filter + structural plastic + teensy bit of electronics + pressure guage (brass metal + glass, liquid)		https://croftsupply.com/separators/?sort=featured&page=3	90% metal, 10% plastic, 0.1% liquid			0.9	0.1									0.001	1.001	Air	CO2_reduction_sabatier
		Compressor Manifold Assembly	4.61599	0	0	0	0	27	aluminum, brass, plastic		https://www.amazon.com/Co2-Manifold-Outlet-C-Kraus/dp/B00838UH6I	95% metal, 5% plastic			0.95	0.05										1	Air	CO2_reduction_sabatier
		Controller Assembly	28.5909	0	55	55	0	27	plastic + electrical components			80% electric, 20% plastic				0.2	0.8									1	Air	CO2_reduction_sabatier
		CO2 Accumulator	10.0266	0.01184	0	0	0	28, 29				100% metal			1											1	Air	CO2_reduction_sabatier
	O2_generation_ISS		233.851	0.266209	1271.36	202.11	0																				Air	O2_generation_ISS
		Deionizing Bed ORU (Inlet)	7.79254	0.00956004	0	0	0	4a (page 182, 119)	resin, polypropylene, stainless steel		https://www.portablewaterdi.com/shop/deionizers/dual-bed-deionizer-standard-model?SKU=OTG2-DDILS	80% resin, 15% plastic, 5% metal			0.05	0.15									0.8	1	Air	O2_generation_ISS
		Deionizing Bed ORU (Recirculating)	7.79254	0.00956004	0	0	0	4a (page 182, 119)	resin, polypropylene, stainless steel		https://www.portablewaterdi.com/shop/deionizers/dual-bed-deionizer-standard-model?SKU=OTG2-DDILS	80% resin, 15% plastic, 5% metal			0.05	0.15									0.8	1	Air	O2_generation_ISS
		Oxygen/Water ORU	36.3956	0.024753	0	0	0	4a (page 180, 156)				33% metal, 33% water, 33% O2			0.333333							0.333333		0.333333		1	Air	O2_generation_ISS
		Pump ORU	6.45528	0.00597856	23.329	23.329	0	4a (page 182, 124, 186)				100% metal			1											1	Air	O2_generation_ISS
		Oxygen Phase Separator ORU	21.8326	0.00544478	0	0	0	4a (page 182, 147)				100% metal			1											1	Air	O2_generation_ISS
		Hydrogen ORU	95.4561	0.0505443	30.7813	30.7813	0	4a (page 182, 162, 186)				100% metal			1											1	Air	O2_generation_ISS
		Hydrogen Sensor ORU	4.59	0.00344	0	0	0	4a (page 182, 141, 145)				100% metal			1											1	Air	O2_generation_ISS
		Process Controller	40.09	0.1359	148	148	0	4a (page 180, 160, 186)	metal casings + electronics.			70% circuitry, 30% metal, 0.1% plastic			0.3	0.001	0.7									1.001	Air	O2_generation_ISS
		Power Supply Module (PSM)	13.4466	0.0210285	1069.25	0	0	4a (page , 244, 76&91)	glass epoxy, polyviride, beryllium oxide, filled epoxy, silicone rubber			70% metal, 10% epoxy, 10% rubber, 10% ceramics			0.7					0.1	0.1				0.1	1	Air	O2_generation_ISS
	Fire_det_sup		8.3	0.0433	1.48	1.48	0.029589																				Air	Fire_det_sup
		Fire Detection Assembly	1.5	0.0028	1.48	1.48	0.029589	5 (page 75)	gold, silver, plastic, circuitry		http://www.madehow.com/Volume-2/Smoke-Detector.html	90% plastic, 5% circuitry, 5% metal			0.05	0.9	0.05									1	Air	Fire_det_sup
		Portable Fire Extinguisher	6.8	0.0405	0	0	0	5 (page 75)	monoammonium phosphate, nitrogen, metal		https://www.sc.edu/ehs/training/Fire/06_drychem.htm	60% metal, 20% gas, 20% distinguishing agent			0.6							0.2			0.2	1	Air	Fire_det_sup
	ACO2R		181.3	0.227	397	397	0																				Air	ACO2R
		Regenerator 1	45.3	0.17	397	397	0	5 (p. 76)	brass, glass, plastic		https://www.astatools.tw/product/s-aco2r/	98% metal, 1% glass, 1% plastic			0.98	0.01			0.01							1	Air	ACO2R
		Metox Canisters	136	0.057	0	0	0	5 (p. 76)				100% structural metal			1											1	Air	ACO2R
	TCCS_ISS		21.4913	0.0387445	141.683	141.683	0																				Air	TCCS_ISS
		Activated charcoal bed	4.63405	0.00956869	0	0	0	5 (page 74), 78, 79	activated charcoal, plastic			50% carbon, 50% plastic				0.5					0.5					1	Air	TCCS_ISS
		Blower Assembly	2.48571	0.00488571	30.3929	30.3929	0	5 (page 74)	metal casing, electronic components			80% metal, 20% electronics			0.8		0.2									1	Air	TCCS_ISS
		Flow Meter Assembly	1.1	0.0003	11.5	11.5	0	5 (page 74)			https://instrumentationtools.com/turbine-flow-meter-installation-procedure/	70% metal, 10% glass, 10% circuitry, 10% plastic			0.7	0.1	0.1		0.1							1	Air	TCCS_ISS
		Catalytic Oxidizer Assembly	8.45714	0.0185143	92.1905	92.1905	0	5 (page 74), 78, 79	stainless steel, aluminum			100% metal			1											1	Air	TCCS_ISS
		LiOH Sorbent bed assembly	0.31439	0.000605775	0	0	0	5 (page 74), 78, 79	LiOH, Polytetrafluoroethylene, metal			90% ceramics, 3% plastic, 7% metal			0.07	0.03					0.9					1	Air	TCCS_ISS
		Electrical interface assembly	4.5	0.00487	7.6	7.6	0	5 (page 74, 151)				100% electric					1									1	Air	TCCS_ISS
Waste			325.831	2.89184	663.745	524.367	209.589																				Waste
	PMWC		38.4765	0.506369	139.379	0	180																				Waste	PMWC
		Aluminum Compaction cylinder	9.40127	0.0233839	0	0	180	32	aluminum			100% metal			1											1	Waste	PMWC
		Band-type heating unit	0	0	136.341	0	0	32	stainless steel, ceramic, nickel-chrome wire	sleeve, insulation, clamps	https://www.briskheat.com/news-events/types-of-band-heaters-and-nozzle-heaters, https://www.globalspec.com/learnmore/processing_equipment/industrial_heaters/band_heaters	90% metal, 10% ceramics			0.9						0.1					1	Waste	PMWC
		Commercial Lightweight, oil-less, compressor/vacuum pump	0	0	2.70748	0	0	32	lead-in-copper alloy	plug, vaccuum,	https://www.mcmaster.com/4299K4/	90% metal, 10% electronic			0.9		0.1									1	Waste	PMWC
		Temperature sensor	0.224	0	0	0	0	32	glass casing, electrical wires		https://www.variohm.com/news-media/technical-blog-archive/what-is-a-temperature-sensor-	40% glass, 60% wires					0.6		0.4							1	Waste	PMWC
		Pressure sensor	0.304	0	0.33	0	0	32	electrical component, plastic casing, metal foil, metal wire		https://www.futek.com/differential-pressure-measurement-sensor	10% foil, 25% plastic casing, 65% electrical components			0.1	0.25	0.65									1	Waste	PMWC
		Housing & Mounting Equipment	23.8611	0.477222	0	0	0	32	metal			100% metal			1											1	Waste	PMWC
		Condensing Heat Exchanger	1.91386	0.003803	0	0	0	32	aluminum alloy, other metals		https://ntrs.nasa.gov/api/citations/20060021945/downloads/20060021945.pdf	100% metal			1											1	Waste	PMWC
		Cooling system	0	0	0	0	0	32				100% metal			1											1	Waste	PMWC
	Waste_storage		17.7049	0.491803	0	0	0																				Waste	Waste_storage
		Low Density PolyEthylene Box	17.7049	0.491803	0	0	0	21	polyethylene			100% plastic				1										1	Waste	Waste_storage
	Waste_collection_ISS		226.667	1.81618	241	241	29.589																				Waste	Waste_collection_ISS
		Commode/Urinal	58.4	0.3	0	0	29.589	102	plastic		https://en.wikipedia.org/wiki/Space_toilet#Basic_parts	100% plastic				1										1	Waste	Waste_collection_ISS
		Fan	0	0	102	102	0	102				100% metal			1											1	Waste	Waste_collection_ISS
		Urine Separator	0	0	125	125	0	102		filter, motor, titanium??	https://ntrs.nasa.gov/api/citations/20140003560/downloads/20140003560.pdf	90% metal, 1% fabric, 9% electronics			0.9		0.09	0.01								1	Waste	Waste_collection_ISS
		Urine Vent Heater	0	0	14	14	0	102			https://history.nasa.gov/SP-368/s6ch2.htm	100% metal			1											1	Waste	Waste_collection_ISS
		Fecal Bags	19.6364	0.21924	0	0	0	102	fabric		https://en.wikipedia.org/wiki/Space_toilet#Basic_parts	100% fabric						1								1	Waste	Waste_collection_ISS
		Wipes, Dry	6.54545	0.0884901	0	0	0	106	polyester/rayon (50-50 mix)		https://www.thomassci.com/Laboratory-Supplies/Wipers/_/Wipes-9X9-Cs500?q=Dry%20Wipes	100% fabric						1								1	Waste	Waste_collection_ISS
		Wipes, Wet	10.2273	0.0530941	0	0	0	106	polyester, water, lotion		https://en.wikipedia.org/wiki/Wet_wipe	60% cloth, 40% water						0.6						0.4		1	Waste	Waste_collection_ISS
		Wipes, Toilet Tissue	3.53455	0.0431555	0	0	0	106	paper		http://www.industrialshredders.com/resources/how-toilet-paper-is-made-basic-overview	100% paper													1	1	Waste	Waste_collection_ISS
		Gloves	5.59636	0.0254852	0	0	0	106	latex		https://dermnetnz.org/topics/surgical-gloves	100% plastic				1										1	Waste	Waste_collection_ISS
		Fecal Bags Odor Lids	29.4545	0.2754	0	0	0	102	plastic		https://www.google.com/url?sa=t&rct=j&q=&esrc=s&source=web&cd=&ved=2ahUKEwiIyrSGiPL1AhXhN30KHfsJAR8QFnoECA8QAQ&url=https%3A%2F%2Fntrs.nasa.gov%2Fapi%2Fcitations%2F20070016696%2Fdownloads%2F20070016696.pdf%3Fattachment%3Dtrue&usg=AOvVaw05_ODJYICUcex7gVXhcW46	100% plastic				1										1	Waste	Waste_collection_ISS
		Fecal collection Canisters	35.0649	0.459	0	0	0	102	plastic bag + stomaseal tape		https://history.nasa.gov/SP-368/s6ch2.htm	90% plastic, 10% cloth				0.9		0.1								1	Waste	Waste_collection_ISS
		Fecal collection Canisters lids	17.5325	0.0717429	0	0	0	102	plastic			100% plastic				1										1	Waste	Waste_collection_ISS
		Urine Prefilters	30.6818	0.16686	0	0	0	102	oxone monopersulfate			100% metal			1											1	Waste	Waste_collection_ISS
		Urine Filters	4.38312	0.0354086	0	0	0	102	aquaporin membrane		https://aquaporin.com/drinking-water-ro-membranes/	100% cloth						1								1	Waste	Waste_collection_ISS
		Urine Funnels	0	0	0	0	0	102	titanium?		https://www.thelily.com/whats-so-special-about-this-toilet-its-the-first-one-nasa-designed-for-women/, https://www.nasa.gov/feature/boldly-go-nasa-s-new-space-toilet-offers-more-comfort-improved-efficiency-for-deep-space	100% metal			1											1	Waste	Waste_collection_ISS
		Flush Water Transfer Bags	5.61039	0.0783	0	0	0	102	Nomex fabric, Nomex webbing, FEP Teflon		https://lsda.jsc.nasa.gov/Hardware/hardw/1264	70% cloth, 30% plastic				0.3		0.7								1	Waste	Waste_collection_ISS
	TCCS_ISS_x2		42.9826	0.0774889	283.367	283.367	0																				Waste	TCCS_ISS_x2
		Activated charcoal bed	9.2681	0.0191374	0	0	0	5 (page 74), 78, 79	activated charcoal, plastic			50% carbon, 50% plastic				0.5									0.5	1	Waste	TCCS_ISS_x3
		Blower Assembly	4.97143	0.00977143	60.7857	60.7857	0	5 (page 74)	metal casing, electronic components			80% metal, 20% electronics			0.8		0.2									1	Waste	TCCS_ISS_x4
		Flow Meter Assembly	2.2	0.0006	23	23	0	5 (page 74)			https://instrumentationtools.com/turbine-flow-meter-installation-procedure/	70% metal, 10% glass, 10% circuitry, 10% plastic			0.7	0.1	0.1		0.1							1	Waste	TCCS_ISS_x5
		Catalytic Oxidizer Assembly	16.9143	0.0370286	184.381	184.381	0	5 (page 74), 78, 79	stainless steel, aluminum			100% metal			1											1	Waste	TCCS_ISS_x6
		LiOH Sorbent bed assembly	0.628779	0.00121155	0	0	0	5 (page 74), 78, 79	LiOH, Polytetrafluoroethylene, metal			90% ceramics, 3% plastic, 7% metal			0.07	0.03					0.9					1	Waste	TCCS_ISS_x7
		Electrical interface assembly	9	0.00974	15.2	15.2	0	5 (page 74, 151)				100% electric					1									1	Waste	TCCS_ISS_x8
Water			926.944	1.63691	754.528	754.528	0																				Water
	Water_recovery_system		350.243	0.877139	364.309	364.309	0																				Water	Water_recovery_system
		MLS Filter ORU	3.32412	0.00466383	0	0	0	22, 97			https://www.semanticscholar.org/paper/Development-of-an-Advanced-Recycle-Filter-Tank-for-Link-Carter/4b539ae9e1ecafb9c133e22b66dd8d770ea55986	50% metal tray, 50% electronic circuitry	https://airandspace.si.edu/collection-objects/processing-board-filter-bank-microwave-limb-sounder-uars/nasm_A20181309002		0.5		0.5									1	Water	Water_recovery_system
		Particulate Filter ORU	17.2235	0.0437973	0	0	0	22, 97	activated carbon, alumina		https://spinoff.nasa.gov/page/space-age-water-conservation-nasa	90% metal, 10% carbon coating			0.9										0.1	1	Water	Water_recovery_system
		Multifiltration Bed #1 & #2 ORUs	0	0	0	0	0	22, 97	water?, Polytetrafluoroethylene, metal	pump, valves, iodine,	https://saemobilus.sae.org/content/911553/	90% water, 3% plastics, 7% metal			0.07	0.03								0.9		1	Water	Water_recovery_system
		Sensor ORU	3.64	0.0093	2.13	2.13	0	22, 97	LCD, polycarbonate, circuitry		https://ntrs.nasa.gov/api/citations/20050207456/downloads/20050207456.pdf, https://www.instrumart.com/assets/Rosemount-Analytical-1056-Datasheet.pdf	60% plastic, 20% screen, 20% electric				0.6	0.2		0.2							1	Water	Water_recovery_system
		Piping	5.36738	0.0111729	0	0	0	22, 97				100% metal			1											1	Water	Water_recovery_system
		Pump/MLS ORU	30.2764	0.0949697	51.1686	51.1686	0	22, 97				50% metal, 50% circuitry			0.5		0.5									1	Water	Water_recovery_system
		Catalytic Reactor & Preheeater ORU	0	0	0	0	0	22, 97	catalyst - may be metal, alumina/some kinda sieve,		https://un.uobasrah.edu.iq/lectures/3307.pdf	100% metal			1											1	Water	Water_recovery_system
		Oxygen Filter	0	0	0	0	0	22, 97	brass, Acrylonitrile butadiene styrene		https://scindustrialsales.com/filters-use-oxygen-systems, https://www.walmart.com/ip/EBTOOLS-Particle-Filter-High-Accuracy-Particle-Filter-Replacement-Filter-Accessory-For-Oxygen-Concentrator-Oxygenerator-Filter/684570596	50% metal, 50% plastic			0.5	0.5										1	Water	Water_recovery_system
		Microbial Check Valve	0	0	0	0	0	22, 97	iodinatedion-exchange resin, metal		https://doi.org/10.4271/911406	99% metal, 1% resin			0.99										0.01	1	Water	Water_recovery_system
		Gas Separator ORU	43.1143	0.0939839	132.331	132.331	0	22, 97	some kinda metal + fiberglass filter + structural plastic + teensy bit of electronics + pressure guage (brass metal + glass, liquid)		https://croftsupply.com/separators/?sort=featured&page=3	90% metal, 10% plastic, 0.1% liquid			0.9	0.1									0.001	1.001	Water	Water_recovery_system
		Hygiene H2O Tank	95.9008	0.178657	7.04904	7.04904	0	22, 97	100% polyethylene resin	tank	http://www.collectspace.com/news/news-081715a-shuttle-endeavour-water-tanks.html	100% plastic				1										1	Water	Water_recovery_system
		Product H2O Tank	53.9695	0.191692	7.84786	7.84786	0	22, 97	100% polyethylene resin	tank	http://www.collectspace.com/news/news-081715a-shuttle-endeavour-water-tanks.html	100% plastic				1										1	Water	Water_recovery_system
		Process Controller	36.91	0.0838	156.18	156.18	0	22, 97	metal casings + electronics.			70% circuitry, 30% metal, 0.1% plastic			0.3	0.001	0.7									1.001	Water	Water_recovery_system
		Reactor Health Sensor	8.64	0.0422	4.72	4.72	0	22, 97	resin, magnesium oxide, electrical components, metal casing		https://ntrs.nasa.gov/api/citations/20030065890/downloads/20030065890.pdf	60% electric, 20% plastic, 10% metal oxide, 10% metal			0.1	0.2	0.6				0.1					1	Water	Water_recovery_system
		H2O Delivery System	42.9719	0.10669	2.88223	2.88223	0	22, 97	metal pipe, rubber insulation.			90% metal, 10% rubber			0.9					0.1						1	Water	Water_recovery_system
	Urinary_primary_processing_ISS		182.602	0.323785	243.552	243.552	0																				Water	Urinary_primary_processing_ISS
		Pressure Control & Pump (PCPA)	27.1388	0.0442231	5.72541	5.72541	0	22, 94	rotor, rollers, electrical components, tubing	four tubes, rotor, rollers	https://ntrs.nasa.gov/api/citations/20090033097/downloads/20090033097.pdf, https://en.wikipedia.org/wiki/Peristaltic_pump	70% metal, 20% plastic, 10% electric			0.7	0.2	0.1									1	Water	Urinary_primary_processing_ISS
		Fluid Control & Pump (FCPA)	27.6349	0.0438601	8.30458	8.30458	0	22, 94	rotor, rollers, electrical components, tubing	four tubes, rotor, rollers	https://ntrs.nasa.gov/api/citations/20090033097/downloads/20090033097.pdf, https://en.wikipedia.org/wiki/Peristaltic_pump	70% metal, 20% plastic, 10% electric			0.7	0.2	0.1									1	Water	Urinary_primary_processing_ISS
		Recycle Filter Tank (RFTA)	11.5488	0.0616461	0	0	0	22, 94		polyproylene filter, tank	https://ntrs.nasa.gov/api/citations/20090033097/downloads/20090033097.pdf	100% plastic				1										1	Water	Urinary_primary_processing_ISS
		Wastewater Storage Tank Assembly (WSTA)	28.9537	0.0248641	0.0819868	0.0819868	0	22, 94	steel		https://www.gitank.com/waste-water-storage-tanks	100% metal			1											1	Water	Urinary_primary_processing_ISS
		Distillation Assembly (DA)	45.8142	0.091471	79.3496	79.3496	0	22, 94	glass + metal + electronics			60% metal, 30% glass, 10% electric			0.6		0.1		0.3							1	Water	Urinary_primary_processing_ISS
		Separator Plumbing Assembly (SPA)	9.87306	0.0150637	0	0	0	22, 94			https://ntrs.nasa.gov/api/citations/20190033326/downloads/20190033326.pdf	99% metal, 1% plastic			0.99	0.01										1	Water	Urinary_primary_processing_ISS
		Power Module (Included in FCA)	0	0	0	0	0	0																		0	Water	Urinary_primary_processing_ISS
		Firmware Controller Assembly (Data module, power module)	24.09	0.0286	150.09	150.09	0	22, 94				80% metal casing, 20% electric			0.8		0.2									1	Water	Urinary_primary_processing_ISS
		Piping	7.54817	0.0140564	0	0	0	22				100% metal			1											1	Water	Urinary_primary_processing_ISS
	Volatile_removal_assembly		35.9966	0.0768376	133.022	133.022	0																				Water	Volatile_removal_assembly
		Catalytic Reactor & Preheeater ORU	0	0	90.481	90.481	0	22, 97	catalyst - may be metal, alumina/some kinda sieve,		https://un.uobasrah.edu.iq/lectures/3307.pdf	100% metal			1											1	Water	Volatile_removal_assembly
		Gas Separator ORU	24.5428	0.0535004	42.5412	42.5412	0	22, 97	some kinda metal + fiberglass filter + structural plastic + teensy bit of electronics + pressure guage (brass metal + glass, liquid)		https://croftsupply.com/separators/?sort=featured&page=3	90% metal, 10% plastic, 0.1% liquid			0.9	0.1									0.001	1.001	Water	Volatile_removal_assembly
		Oxygen Filter	0	0	0	0	0	22, 97	brass, Acrylonitrile butadiene styrene		https://scindustrialsales.com/filters-use-oxygen-systems, https://www.walmart.com/ip/EBTOOLS-Particle-Filter-High-Accuracy-Particle-Filter-Replacement-Filter-Accessory-For-Oxygen-Concentrator-Oxygenerator-Filter/684570596	50% metal, 50% plastic			0.5	0.5										1	Water	Volatile_removal_assembly
		Piping	1.26268	0.00267502	0	0	0	22, 97				100% metal			1											1	Water	Volatile_removal_assembly
	Potable_water_tank		358.102	0.35915	13.6451	13.6451	0																				Water	Potable_water_tank
		Product H2O Tank	101.116	0.35915	13.6451	13.6451	0	22, 97	100% polyethylene resin	tank	http://www.collectspace.com/news/news-081715a-shuttle-endeavour-water-tanks.html	100% plastic				1										1	Water	Potable_water_tank
		H2O Stored	256.986	0	0	0	0		100% H2O			100% water												1		1	Water	Potable_water_tank
Food			1147.71	3.14789	960	960	0																				Food
	Food		892.543	0	0	0	0																				Food	Food
	Food_storage		218.862	3.05389	0	0	0																				Food	Food_storage
		Lockers	218.862	3.05389	0	0	0		"includes processing unit, microwave, drink dispenser, bread machine, freezer mass"	stainless steel, polyurethane		25% metal, 25% plastic, 50% food			0.25	0.25							0.5			1	Food	Food_storage
	Food_processing		36.3	0.094	960	960	0																				Food	Food_processing
		Rehydration Unit and Conduction Oven	36.3	0.094	960	960	0	47		metal, glass, electronics. Fan (metal), casing (metal), glass (panel/window in door), electric heat source	https://cookyaunty.com/how-does-a-convection-oven-work/	70% metal, 25% electric, 5% plastic			0.7	0.05	0.25									1	Food	Food_processing
Thermal			192.2	0.550289	567.314	567.314	0.986301																				Thermal
	CCAA		66.7099	0.226489	331.314	331.314	0																				Thermal	CCAA
		Inlet ORU	0	0	312.645	312.645	0	5 (p. 73)	metal?			100% metal			1											1	Thermal	CCAA
		Condensing heat exchanger	37.6915	0.07476	0	0	0	5 (p.73), 46 (p.1-6)	aluminum alloy, other metals		https://ntrs.nasa.gov/api/citations/20060021945/downloads/20060021945.pdf	100% metal			1											1	Thermal	CCAA
		Water separator	6.41309	0.0442449	10.1871	10.1871	0	5 (p.73), 46 (p.1-12)		vanes, vortex arrestor, electrophoretic painting, polyester powder coating, aluminum alloy	https://www.walkerfiltration.com/wp-content/uploads/2020/09/WFI1057-Rev-A-US-0920-Water-Separator.pdf, https://www.compressorworld.com/aircel-6-cfm-water-separator-1-8-aws-6.html	99% metal, 1% coating			0.99										0.01	1	Thermal	CCAA
		Temp. Control & Check Valve	4.08878	0.0277492	0.0620976	0.0620976	0	5 (p. 73)	aluminum, steel, plastic, magnets, silicon steel, copper, wiper	motor-driven actuator, valve	https://www.timotion.com/en/news-and-articles/part-2-components-of-an-electric-linear-actuator, https://www.nasa.gov/centers/johnson/pdf/383445main_eclss_21002.pdf	80% metal, 15% plastic, 5% fabric			0.8	0.15		0.05								1	Thermal	CCAA
		Electrical Interface Box (EIB)	4.1	0.0113	8	8	0	5 (p. 73)	metal housing, electrical components			90% metal, 10% electric			0.9		0.1									1	Thermal	CCAA
		Temp. Sensor	0.24	0.0006	0.01	0.01	0	5 (p. 73)	glass casing, electrical wires		https://www.variohm.com/news-media/technical-blog-archive/what-is-a-temperature-sensor-	40% glass, 60% electrical					0.6		0.4							1	Thermal	CCAA
		Liquid Sensor	0.47	0.0006	0.01	0.01	0	5 (p. 73)	Polysulphone , electrical components		https://www.sparkfun.com/products/13835	50% plastic, 50% electrical				0.5	0.5									1	Thermal	CCAA
		Fan Delta P Sensor	0.4	0.00024	0.2	0.2	0	5 (p. 73)			https://www.fantech.com.au/images/PDF/Catalogue/PressureSensor.pdf	90% metal casing, 10% electric			0.9		0.1									1	Thermal	CCAA
		Pressure Sensor	0.3	6e-05	0.2	0.2	0	5 (p. 73)	electrical component, plastic casing, metal foil, metal wire		https://www.futek.com/differential-pressure-measurement-sensor	10% foil, 25% plastic casing, 65% electrical components			0.1	0.25	0.65									1	Thermal	CCAA
	Atmosphere_microbial_control		103.22	0.2706	0	0	0.986301																				Thermal	Atmosphere_microbial_control
		HEPA Filter Element	49.22	0.1886	0	0	0.986301	5 (p. 73)	glass fibers + structural metal		https://cowaymega.com/blogs/blog/what-is-a-hepa-filter	70% metal, 30% glass			0.7				0.3							1	Thermal	Atmosphere_microbial_control
		Catalytic Filter element	54	0.082	0	0	0	5 (p.73)	catalytic granular carbon + structural plastic		https://www.theperfectwater.com/radial-flow-20-gpm-whole-house-100-catalytic-carbon-filter-20-x-4-5.html?msclkid=12a5bf229e0a19ae9182dd207a78717d	70% plastic, 30% fabric				0.7		0.3								1	Thermal	Atmosphere_microbial_control
	Atmosphere_circulation		9.87	0.0192	61	61	0																				Thermal	Atmosphere_circulation
		IMV Fan	4.77	0.0093	55	55	0	1 (p. 8), 46 (p. 3-4)		flow straightener, resilient mounts, captive fasteners (4), acoustic wraps, A1-J2 power connector, A1-J1 signal connector	https://ntrs.nasa.gov/api/citations/20080015378/downloads/20080015378.pdf	90% metal, 5% fabric, 5% plastic			0.9	0.05		0.05								1	Thermal	Atmosphere_circulation
		IMV Valve	5.1	0.0099	6	6	0	1 (p. 8)	Titanium, stainless steel		https://www.cobhammissionsystems.com/space-propulsion-systems/service-valves/	100% metal			1											1	Thermal	Atmosphere_circulation
	AAA		12.4	0.034	175	175	0																				Thermal	AAA
		Avionics Air Assembly	12.4	0.034	175	175	0	5 (p.73), 46 (p. 2-3)		acoustic cover/inlet muffler assembly, fan assembly, heat exchanger, outlet muffler, electronics cavity, subframe	https://ntrs.nasa.gov/api/citations/20080015378/downloads/20080015378.pdf	80% metal, 10% fabric, 10% plastic			0.8	0.1		0.1								1	Thermal	AAA

## Sheet: ESM
Item	Mass, kg	Volume, m3	Power, watts	Cooling, watts	Crew time, MMH/yr	System	Subsystem
Vent/Relief Valve	5.4	0.0141	0	0	0	Air	APC
Pressure control panel	11.2	0.034	18	18	0	Air	APC
Manual Pressure Equalization Valve	9.6	0.0112	0	0	0	Air	APC
Positive Pressure Relief Valve	1.8	0.0034	0	0	0	Air	APC
Negative Pressure Relief Valve	3	0.0093	0	0	0	Air	APC
Nitrogen Interface Assembly	7.5	0.0122	5.5	5.5	0	Air	APC
Vacuum Access Jumper 5-ft	0.7	0.00043	0	0	0	Air	APC
Vacuum Access Jumper 35-ft	3.2	0.003	0	0	0	Air	APC
Verification Gas Assembly	5.4	0.0136	0.1	0.1	0	Air	ACMA
Mass Spectrometer	13.9	0.0238	31.8	31.8	0	Air	ACMA
Sample Pump	3.4	0.0045	4	4	0	Air	ACMA
Sample Distributor	2.1	0.0045	0.1	0.1	0	Air	ACMA
Data & Control	8	0.0141	34.9	34.9	0	Air	ACMA
Low Volt. Power supply	5.7	0.0054	30.8	30.8	0	Air	ACMA
Chassis	15.8	0.0238	0	0	0	Air	ACMA
Inlet Valve Assembly	0	0	0	0	0	Air	ACMA
EMI Filter	0	0	1.8	1.8	0	Air	ACMA
3-way solenoid valves	31.5	0.0345	0	0	0	Air	SDS
Manual valves	2.53	0.0066	0	0	0	Air	SDS
Sample probes	1.08	0.00024	0	0	0	Air	SDS
Air Selector Valve	12.8105	0.00837611	0.701979	0.701979	0.986301	Air	CO2_removal_4BMS
Desiccant Bed	24.2885	0.248501	0	0	0.236712	Air	CO2_removal_4BMS
Adsorbent Bed	33.1334	0	578.431	578.431	0	Air	CO2_removal_4BMS
Air Check Valve	0.164237	0	0	0	0	Air	CO2_removal_4BMS
Heater Controller	6.6	0.0016	38	38	0.00986301	Air	CO2_removal_4BMS
Air Blower	0.821187	0.0205297	40.7148	40.7148	0.0641096	Air	CO2_removal_4BMS
Precooler	2.21721	0	0	0	0	Air	CO2_removal_4BMS
Blower/precooler Motor Controller	1.3	0	5	5	0	Air	CO2_removal_4BMS
CO2 Pump	6.73374	0.00369534	13.3376	13.3376	0.0394521	Air	CO2_removal_4BMS
CO2 Pump Motor Controller	1.3	0.0057	2	2	0.00493151	Air	CO2_removal_4BMS
Temperature Sensor	0.399	0	1	1	0	Air	CO2_removal_4BMS
Differential Pressure Sensor	0.2	0	1	1	0	Air	CO2_removal_4BMS
Absolute Pressure Sensor	0.2	0	1	1	0	Air	CO2_removal_4BMS
Electrical Harness	4.5	0	0	0	0	Air	CO2_removal_4BMS
Plumbing	4.84501	0	0	0	0	Air	CO2_removal_4BMS
Support Structure	29.6449	0	0	0	0	Air	CO2_removal_4BMS
Fluid Disconnects	1.97085	0	44	0	0	Air	CO2_removal_4BMS
Electronics coldplate	2.70992	0	0	0	0	Air	CO2_removal_4BMS
Electronics Interface Plate	1.6	0	0	0	0	Air	CO2_removal_4BMS
MD Shield Instl	0	0	0	0	0	Air	N2_storage
Multilayer Insulation Assembly-T #1	0	0	0	0	0	Air	N2_storage
Multilayer Insulation Assembly-T #2	0	0	0	0	0	Air	N2_storage
Primary Structure Assembly -HPG ORU	0	0	0	0	0	Air	N2_storage
Tank ORU Assembly	0	0	0	0	0	Air	N2_storage
Utilities Installation - O2/N2 Tank	0	0	0	0	0	Air	N2_storage
N2 Bare Tank	80.3715	0	0	0	0	Air	N2_storage
HPGA Fluid	81.7409	0	0	0	0	Air	N2_storage
Handhold, top mounted	0.215794	0	0	0	0	Air	N2_storage
Handrail 21.941 in custom	0.377639	0	0	0	0	Air	N2_storage
Handrail, top mounted	0.395622	0	0	0	0	Air	N2_storage
Grapple fixture, flt releasable	11.1134	0	0	0	0	Air	N2_storage
Accessories	4.02263	0	0	0	0	Air	N2_storage
MD Shield Instl	0	0	0	0	0	Air	O2_storage
Multilayer Insulation Assembly-T #1	0	0	0	0	0	Air	O2_storage
Multilayer Insulation Assembly-T #2	0	0	0	0	0	Air	O2_storage
Primary Structure Assembly -HPG ORU	0	0	0	0	0	Air	O2_storage
Tank ORU Assembly	0	0	0	0	0	Air	O2_storage
Utilities Installation - O2/N2 Tank	0	0	0	0	0	Air	O2_storage
O2 Bare Tank	56.0785	0	0	0	0	Air	O2_storage
HPGA Fluid	48	0	0	0	0	Air	O2_storage
Handhold, top mounted	0.126719	0	0	0	0	Air	O2_storage
Handrail 21.941 in custom	0.221758	0	0	0	0	Air	O2_storage
Handrail, top mounted	0.232318	0	0	0	0	Air	O2_storage
Grapple fixture, flt releasable	6.52601	0	0	0	0	Air	O2_storage
Accessories	2.80675	0	0	0	0	Air	O2_storage
Condensing Heat Exchanger	1.46872	0	0	0	0	Air	CO2_reduction_sabatier
AAA heat exchanger	2.46536	0	0	0	0	Air	CO2_reduction_sabatier
ITCS Coolant Water Inlet QD	0.47209	0	0	0	0	Air	CO2_reduction_sabatier
ITCS Coolant Water Outlet QD	0.35669	0	0	0	0	Air	CO2_reduction_sabatier
Heat Exchanger Inlet Temp	0.363636	0	0	0	0	Air	CO2_reduction_sabatier
Heat Exchanger Outlet Temp	0.363636	0	0	0	0	Air	CO2_reduction_sabatier
Manifold, CO2	4.7209	0	0	0	0	Air	CO2_reduction_sabatier
CO2 Inlet Check Valve	0.104909	0	0	0	0	Air	CO2_reduction_sabatier
CO2 Inlet Filter	0.0536359	0	0	0	0	Air	CO2_reduction_sabatier
Pressure sensor, CO2 Inlet	0.409091	0	0	0	0	Air	CO2_reduction_sabatier
CO2 Inlet QD	0.47209	0	0	0	0	Air	CO2_reduction_sabatier
CO2 Inlet Regulator	0.917952	0	0	0	0	Air	CO2_reduction_sabatier
CO2 Inlet NC Solenoid	0.47209	0	0	0	0	Air	CO2_reduction_sabatier
CO2 Inlet Flow Control	2.15063	0	0	0	0	Air	CO2_reduction_sabatier
CO2 Flow Control Orifice	0.0524544	0	0	0	0	Air	CO2_reduction_sabatier
Delta P Sensor, Flow Sensor CO2	0.909091	0	0	0	0	Air	CO2_reduction_sabatier
CO2 Flow Meter Orifice	0.0262272	0	0	0	0	Air	CO2_reduction_sabatier
Manifold, Hydrogen	4.37994	0	0	0	0	Air	CO2_reduction_sabatier
Water Outlet Quick Disconnect	0.47209	0	0	0	0	Air	CO2_reduction_sabatier
Hydrogen Inlet Check Valve	0.104909	0	0	0	0	Air	CO2_reduction_sabatier
Hydrogen Inlet Filter	0.0536359	0	0	0	0	Air	CO2_reduction_sabatier
H2O Outlet Pressure Sensor	0.818182	0	0	0	0	Air	CO2_reduction_sabatier
Hydrogen Inlet Quick Disconnect	0.47209	0	0	0	0	Air	CO2_reduction_sabatier
Hydrogen Inlet NC Solenoid	0.944179	0	0	0	0	Air	CO2_reduction_sabatier
Delta P Sensor, Flow Sensor H2	0.909091	0	0	0	0	Air	CO2_reduction_sabatier
H2 Flow Meter Orifice	0.0262272	0	0	0	0	Air	CO2_reduction_sabatier
Manifold, Vent	5.06185	0	0	0	0	Air	CO2_reduction_sabatier
Liquid Sensor	1.09091	0	0	0	0	Air	CO2_reduction_sabatier
Vent Pressure Sensor	0.818182	0	0	0	0	Air	CO2_reduction_sabatier
Vent Outlet Quick Disconnect	0.47209	0	0	0	0	Air	CO2_reduction_sabatier
Vent Regulator	0.917952	0	0	0	0	Air	CO2_reduction_sabatier
Vent Relief/Check #1	0.157363	0	0	0	0	Air	CO2_reduction_sabatier
Vent Relief/Check #2	0.157363	0	0	0	0	Air	CO2_reduction_sabatier
Vent Outlet NO Solenoid	0.944179	0	0	0	0	Air	CO2_reduction_sabatier
Water Pressure Sensor	0.818182	0	0	0	0	Air	CO2_reduction_sabatier
Water Relief	0.157363	0	0	0	0	Air	CO2_reduction_sabatier
Water Outlet NC Solenoid	0.47209	0	0	0	0	Air	CO2_reduction_sabatier
Rotary Water Separator Assembly	4.03899	0	22.6625	22.6625	0	Air	CO2_reduction_sabatier
Sabatier Reactor Assembly	2.51781	0	3.23749	3.23749	0	Air	CO2_reduction_sabatier
Structure (A/R)	9.15329	0	0	0	0	Air	CO2_reduction_sabatier
Miscellaneous Hardware (Clampts, bolts, etc.) (A/R)	1.77273	0	0	0	0	Air	CO2_reduction_sabatier
Air Cooling NC Solenoid	0.629453	0	0	0	0	Air	CO2_reduction_sabatier
Air Inlet Filter	0.107272	0	0	0	0	Air	CO2_reduction_sabatier
Air Sabatier Orifice	0.0524544	0	0	0	0	Air	CO2_reduction_sabatier
Heat Exchanger Inlet Duct	0.104909	0	0	0	0	Air	CO2_reduction_sabatier
Heat Exchanger Outlet Duct	0.104909	0	0	0	0	Air	CO2_reduction_sabatier
Reactor Inlet Duct	0.209818	0	0	0	0	Air	CO2_reduction_sabatier
Reactor Outlet Duct	0.104909	0	0	0	0	Air	CO2_reduction_sabatier
Tubing (A/R)	0.681907	0	0	0	0	Air	CO2_reduction_sabatier
Harnesses	11.4545	0	0	0	0	Air	CO2_reduction_sabatier
Valves & Sensors' total power	0	0	7.37494	7.37494	0	Air	CO2_reduction_sabatier
Mechanical Compressor ORU	18.8836	0	45.3249	45.3249	0	Air	CO2_reduction_sabatier
Compressor Manifold Assembly	4.61599	0	0	0	0	Air	CO2_reduction_sabatier
Controller Assembly	28.5909	0	55	55	0	Air	CO2_reduction_sabatier
CO2 Accumulator	10.0266	0.01184	0	0	0	Air	CO2_reduction_sabatier
Deionizing Bed ORU (Inlet)	7.79254	0.00956004	0	0	0	Air	O2_generation_ISS
Deionizing Bed ORU (Recirculating)	7.79254	0.00956004	0	0	0	Air	O2_generation_ISS
Oxygen/Water ORU	36.3956	0.024753	0	0	0	Air	O2_generation_ISS
Pump ORU	6.45528	0.00597856	23.329	23.329	0	Air	O2_generation_ISS
Oxygen Phase Separator ORU	21.8326	0.00544478	0	0	0	Air	O2_generation_ISS
Hydrogen ORU	95.4561	0.0505443	30.7813	30.7813	0	Air	O2_generation_ISS
Hydrogen Sensor ORU	4.59	0.00344	0	0	0	Air	O2_generation_ISS
Process Controller	40.09	0.1359	148	148	0	Air	O2_generation_ISS
Power Supply Module (PSM)	13.4466	0.0210285	1069.25	0	0	Air	O2_generation_ISS
Fire Detection Assembly	1.5	0.0028	1.48	1.48	0.029589	Air	Fire_det_sup
Portable Fire Extinguisher	6.8	0.0405	0	0	0	Air	Fire_det_sup
Regenerator 1	45.3	0.17	397	397	0	Air	ACO2R
Metox Canisters	136	0.057	0	0	0	Air	ACO2R
Activated charcoal bed	4.63405	0.00956869	0	0	0	Air	TCCS_ISS
Blower Assembly	2.48571	0.00488571	30.3929	30.3929	0	Air	TCCS_ISS
Flow Meter Assembly	1.1	0.0003	11.5	11.5	0	Air	TCCS_ISS
Catalytic Oxidizer Assembly	8.45714	0.0185143	92.1905	92.1905	0	Air	TCCS_ISS
LiOH Sorbent bed assembly	0.31439	0.000605775	0	0	0	Air	TCCS_ISS
Electrical interface assembly	4.5	0.00487	7.6	7.6	0	Air	TCCS_ISS
Aluminum Compaction cylinder	9.40127	0.0233839	0	0	180	Waste	PMWC
Band-type heating unit	0	0	136.341	0	0	Waste	PMWC
Commercial Lightweight, oil-less, compressor/vacuum pump	0	0	2.70748	0	0	Waste	PMWC
Temperature sensor	0.224	0	0	0	0	Waste	PMWC
Pressure sensor	0.304	0	0.33	0	0	Waste	PMWC
Housing & Mounting Equipment	23.8611	0.477222	0	0	0	Waste	PMWC
Condensing Heat Exchanger	1.91386	0.003803	0	0	0	Waste	PMWC
Cooling system	0	0	0	0	0	Waste	PMWC
Low Density PolyEthylene Box	17.7049	0.491803	0	0	0	Waste	Waste_storage
Commode/Urinal	58.4	0.3	0	0	29.589	Waste	Waste_collection_ISS
Fan	0	0	102	102	0	Waste	Waste_collection_ISS
Urine Separator	0	0	125	125	0	Waste	Waste_collection_ISS
Urine Vent Heater	0	0	14	14	0	Waste	Waste_collection_ISS
Fecal Bags	19.6364	0.21924	0	0	0	Waste	Waste_collection_ISS
Wipes, Dry	6.54545	0.0884901	0	0	0	Waste	Waste_collection_ISS
Wipes, Wet	10.2273	0.0530941	0	0	0	Waste	Waste_collection_ISS
Wipes, Toilet Tissue	3.53455	0.0431555	0	0	0	Waste	Waste_collection_ISS
Gloves	5.59636	0.0254852	0	0	0	Waste	Waste_collection_ISS
Fecal Bags Odor Lids	29.4545	0.2754	0	0	0	Waste	Waste_collection_ISS
Fecal collection Canisters	35.0649	0.459	0	0	0	Waste	Waste_collection_ISS
Fecal collection Canisters lids	17.5325	0.0717429	0	0	0	Waste	Waste_collection_ISS
Urine Prefilters	30.6818	0.16686	0	0	0	Waste	Waste_collection_ISS
Urine Filters	4.38312	0.0354086	0	0	0	Waste	Waste_collection_ISS
Urine Funnels	0	0	0	0	0	Waste	Waste_collection_ISS
Flush Water Transfer Bags	5.61039	0.0783	0	0	0	Waste	Waste_collection_ISS
Activated charcoal bed	9.2681	0.0191374	0	0	0	Waste	TCCS_ISS_x3
Blower Assembly	4.97143	0.00977143	60.7857	60.7857	0	Waste	TCCS_ISS_x4
Flow Meter Assembly	2.2	0.0006	23	23	0	Waste	TCCS_ISS_x5
Catalytic Oxidizer Assembly	16.9143	0.0370286	184.381	184.381	0	Waste	TCCS_ISS_x6
LiOH Sorbent bed assembly	0.628779	0.00121155	0	0	0	Waste	TCCS_ISS_x7
Electrical interface assembly	9	0.00974	15.2	15.2	0	Waste	TCCS_ISS_x8
MLS Filter ORU	3.32412	0.00466383	0	0	0	Water	Water_recovery_system
Particulate Filter ORU	17.2235	0.0437973	0	0	0	Water	Water_recovery_system
Multifiltration Bed #1 & #2 ORUs	0	0	0	0	0	Water	Water_recovery_system
Sensor ORU	3.64	0.0093	2.13	2.13	0	Water	Water_recovery_system
Piping	5.36738	0.0111729	0	0	0	Water	Water_recovery_system
Pump/MLS ORU	30.2764	0.0949697	51.1686	51.1686	0	Water	Water_recovery_system
Catalytic Reactor & Preheeater ORU	0	0	0	0	0	Water	Water_recovery_system
Oxygen Filter	0	0	0	0	0	Water	Water_recovery_system
Microbial Check Valve	0	0	0	0	0	Water	Water_recovery_system
Gas Separator ORU	43.1143	0.0939839	132.331	132.331	0	Water	Water_recovery_system
Hygiene H2O Tank	95.9008	0.178657	7.04904	7.04904	0	Water	Water_recovery_system
Product H2O Tank	53.9695	0.191692	7.84786	7.84786	0	Water	Water_recovery_system
Process Controller	36.91	0.0838	156.18	156.18	0	Water	Water_recovery_system
Reactor Health Sensor	8.64	0.0422	4.72	4.72	0	Water	Water_recovery_system
H2O Delivery System	42.9719	0.10669	2.88223	2.88223	0	Water	Water_recovery_system
Pressure Control & Pump (PCPA)	27.1388	0.0442231	5.72541	5.72541	0	Water	Urinary_primary_processing_ISS
Fluid Control & Pump (FCPA)	27.6349	0.0438601	8.30458	8.30458	0	Water	Urinary_primary_processing_ISS
Recycle Filter Tank (RFTA)	11.5488	0.0616461	0	0	0	Water	Urinary_primary_processing_ISS
Wastewater Storage Tank Assembly (WSTA)	28.9537	0.0248641	0.0819868	0.0819868	0	Water	Urinary_primary_processing_ISS
Distillation Assembly (DA)	45.8142	0.091471	79.3496	79.3496	0	Water	Urinary_primary_processing_ISS
Separator Plumbing Assembly (SPA)	9.87306	0.0150637	0	0	0	Water	Urinary_primary_processing_ISS
Power Module (Included in FCA)	0	0	0	0	0	Water	Urinary_primary_processing_ISS
Firmware Controller Assembly (Data module, power module)	24.09	0.0286	150.09	150.09	0	Water	Urinary_primary_processing_ISS
Piping	7.54817	0.0140564	0	0	0	Water	Urinary_primary_processing_ISS
Catalytic Reactor & Preheeater ORU	0	0	90.481	90.481	0	Water	Volatile_removal_assembly
Gas Separator ORU	24.5428	0.0535004	42.5412	42.5412	0	Water	Volatile_removal_assembly
Oxygen Filter	0	0	0	0	0	Water	Volatile_removal_assembly
Piping	1.26268	0.00267502	0	0	0	Water	Volatile_removal_assembly
Product H2O Tank	101.116	0.35915	13.6451	13.6451	0	Water	Potable_water_tank
H2O Stored	256.986	0	0	0	0	Water	Potable_water_tank
Lockers	218.862	3.05389	0	0	0	Food	Food_storage
Rehydration Unit and Conduction Oven	36.3	0.094	960	960	0	Food	Food_processing
Inlet ORU	0	0	312.645	312.645	0	Thermal	CCAA
Condensing heat exchanger	37.6915	0.07476	0	0	0	Thermal	CCAA
Water separator	6.41309	0.0442449	10.1871	10.1871	0	Thermal	CCAA
Temp. Control & Check Valve	4.08878	0.0277492	0.0620976	0.0620976	0	Thermal	CCAA
Electrical Interface Box (EIB)	4.1	0.0113	8	8	0	Thermal	CCAA
Temp. Sensor	0.24	0.0006	0.01	0.01	0	Thermal	CCAA
Liquid Sensor	0.47	0.0006	0.01	0.01	0	Thermal	CCAA
Fan Delta P Sensor	0.4	0.00024	0.2	0.2	0	Thermal	CCAA
Pressure Sensor	0.3	6e-05	0.2	0.2	0	Thermal	CCAA
HEPA Filter Element	49.22	0.1886	0	0	0.986301	Thermal	Atmosphere_microbial_control
Catalytic Filter element	54	0.082	0	0	0	Thermal	Atmosphere_microbial_control
IMV Fan	4.77	0.0093	55	55	0	Thermal	Atmosphere_circulation
IMV Valve	5.1	0.0099	6	6	0	Thermal	Atmosphere_circulation
Avionics Air Assembly	12.4	0.034	175	175	0	Thermal	AAA

## Sheet: ESM Factors
Case	Crew	Duration	Destination	S_num	V_Eq	P_Eq	C_Eq	CT_Eq	L_Eq
1	4	180	Moon	1	126	136	55.4	0.7	7.2
2	4	540	Mars	1	117.7	162	96	0.7	30
3	4	180	Moon	30	126	136	55.4	0.7	7.2
4	4	540	Mars	10	117.7	162	96	0.7	30
5	4	5400	Mars	1	117.7	162	96	0.7	30
6	100	5400	Moon	1	126	136	55.4	0.7	7.2
7	100	5400	Mars	1	117.7	162	96	0.7	30

## Sheet: case 1 moon 1 trip
System	Subsystem	Item	Mass, kg	Volume, m3	Power, watts	Cooling, watts	Crew time, MMH/yr	fraction Structural Metal	fraction Plastic	fraction Electronics	fraction Fabric	fraction Glass	fraction Rubber	fraction Ceramics	fraction Gas	fraction biomass	fraction Water	fraction Other
Air	APC	Vent/Relief Valve	5.4	0.0141	0	0	0	1	0	0	0	0	0	0	0	0	0	0
Air	APC	Pressure control panel	11.2	0.034	18	18	0	0.2	0.1	0.7	0	0	0	0	0	0	0	0
Air	APC	Manual Pressure Equalization Valve	9.6	0.0112	0	0	0	1	0	0	0	0	0	0	0	0	0	0
Air	APC	Positive Pressure Relief Valve	1.8	0.0034	0	0	0	1	0	0	0	0	0	0	0	0	0	0
Air	APC	Negative Pressure Relief Valve	3	0.0093	0	0	0	1	0	0	0	0	0	0	0	0	0	0
Air	APC	Nitrogen Interface Assembly	7.5	0.0122	5.5	5.5	0	1	0	0	0	0	0	0	0	0	0	0
Air	APC	Vacuum Access Jumper 5-ft	0.7	0.00043	0	0	0	0	0	1	0	0	0	0	0	0	0	0
Air	APC	Vacuum Access Jumper 35-ft	3.2	0.003	0	0	0	0	0	1	0	0	0	0	0	0	0	0
Air	ACMA	Verification Gas Assembly	5.4	0.0136	0.1	0.1	0	0.5	0	0	0	0	0	0	0.5	0	0	0
Air	ACMA	Mass Spectrometer	13.9	0.0238	31.8	31.8	0	0.5	0	0.5	0	0	0	0	0	0	0	0
Air	ACMA	Sample Pump	3.4	0.0045	4	4	0	1	0	0	0	0	0	0	0	0	0	0
Air	ACMA	Sample Distributor	2.1	0.0045	0.1	0.1	0	0.95	0	0	0.05	0	0	0	0	0	0	0
Air	ACMA	Data & Control	8	0.0141	34.9	34.9	0	0.5	0	0.5	0	0	0	0	0	0	0	0
Air	ACMA	Low Volt. Power supply	5.7	0.0054	30.8	30.8	0	0.7	0	0	0	0	0.1	0.1	0	0	0	0.1
Air	ACMA	Chassis	15.8	0.0238	0	0	0	1	0	0	0	0	0	0	0	0	0	0
Air	ACMA	Inlet Valve Assembly	0	0	0	0	0	0.9	0	0	0.01	0	0	0	0	0	0.09	0
Air	ACMA	EMI Filter	0	0	1.8	1.8	0	0.98	0.02	0	0	0	0	0	0	0	0	0
Air	SDS	3-way solenoid valves	31.5	0.0345	0	0	0	1	0	0	0	0	0	0	0	0	0	0
Air	SDS	Manual valves	2.53	0.0066	0	0	0	1	0	0	0	0	0	0	0	0	0	0
Air	SDS	Sample probes	1.08	0.00024	0	0	0	1	0	0	0	0	0	0	0	0	0	0
Air	CO2_removal_4BMS	Air Selector Valve	12.8105	0.00837611	0.701979	0.701979	0.986301	0.9	0	0	0	0	0	0	0.1	0	0	0
Air	CO2_removal_4BMS	Desiccant Bed	24.2885	0.248501	0	0	0.236712	0.4	0	0	0	0	0	0.6	0	0	0	0
Air	CO2_removal_4BMS	Adsorbent Bed	33.1334	0	578.431	578.431	0	0.5	0	0	0.2	0	0	0.3	0	0	0	0
Air	CO2_removal_4BMS	Air Check Valve	0.164237	0	0	0	0	1	0	0	0	0	0	0	0	0	0	0
Air	CO2_removal_4BMS	Heater Controller	6.6	0.0016	38	38	0.00986301	0.8	0	0.2	0	0	0	0	0	0	0	0
Air	CO2_removal_4BMS	Air Blower	0.821187	0.0205297	40.7148	40.7148	0.0641096	1	0	0	0	0	0	0	0	0	0	0
Air	CO2_removal_4BMS	Precooler	2.21721	0	0	0	0	1	0	0	0	0	0	0	0	0	0	0
Air	CO2_removal_4BMS	Blower/precooler Motor Controller	1.3	0	5	5	0	0.6	0	0.4	0	0	0	0	0	0	0	0
Air	CO2_removal_4BMS	CO2 Pump	6.73374	0.00369534	13.3376	13.3376	0.0394521	0.99	0	0	0	0	0	0	0	0	0	0.01
Air	CO2_removal_4BMS	CO2 Pump Motor Controller	1.3	0.0057	2	2	0.00493151	0.3	0	0.7	0	0	0	0	0	0	0	0
Air	CO2_removal_4BMS	Temperature Sensor	0.399	0	1	1	0	0	0	0.6	0	0.4	0	0	0	0	0	0
Air	CO2_removal_4BMS	Differential Pressure Sensor	0.2	0	1	1	0	0.1	0.25	0.65	0	0	0	0	0	0	0	0
Air	CO2_removal_4BMS	Absolute Pressure Sensor	0.2	0	1	1	0	0.75	0	0	0	0	0	0.25	0	0	0	0
Air	CO2_removal_4BMS	Electrical Harness	4.5	0	0	0	0	0.9	0.05	0	0.05	0	0	0	0	0	0	0
Air	CO2_removal_4BMS	Plumbing	4.84501	0	0	0	0	1	0	0	0	0	0	0	0	0	0	0
Air	CO2_removal_4BMS	Support Structure	29.6449	0	0	0	0	1	0	0	0	0	0	0	0	0	0	0
Air	CO2_removal_4BMS	Fluid Disconnects	1.97085	0	0	0	0	1	0	0	0	0	0	0	0	0	0	0
Air	CO2_removal_4BMS	Electronics coldplate	2.70992	0	0	0	0	1	0	0	0	0	0	0	0	0	0	0
Air	CO2_removal_4BMS	Electronics Interface Plate	1.6	0	0	0	0	1	0	0	0	0	0	0	0	0	0	0
Air	N2_storage	MD Shield Instl	0	0	0	0	0	1	0	0	0	0	0	0	0	0	0	0
Air	N2_storage	Multilayer Insulation Assembly-T #1	0	0	0	0	0	1	0	0	0	0	0	0	0	0	0	0
Air	N2_storage	Multilayer Insulation Assembly-T #2	0	0	0	0	0	1	0	0	0	0	0	0	0	0	0	0
Air	N2_storage	Primary Structure Assembly -HPG ORU	0	0	0	0	0	0.5	0	0	0	0	0	0	0.5	0	0	0
Air	N2_storage	Tank ORU Assembly	0	0	0	0	0	1	0	0	0	0	0	0	0	0	0	0
Air	N2_storage	Utilities Installation - O2/N2 Tank	0	0	0	0	0	0.5	0	0	0	0	0	0	0.5	0	0	0
Air	N2_storage	N2 Bare Tank	80.3715	0	0	0	0	0.9	0	0	0	0	0.05	0	0.05	0	0	0
Air	N2_storage	HPGA Fluid	81.7409	0	0	0	0	0	0	0	0	0	0	0	0	0	1	0
Air	N2_storage	Handhold, top mounted	0.215794	0	0	0	0	0	1	0	0	0	0	0	0	0	0	0
Air	N2_storage	Handrail 21.941 in custom	0.377639	0	0	0	0	0	1	0	0	0	0	0	0	0	0	0
Air	N2_storage	Handrail, top mounted	0.395622	0	0	0	0	0	1	0	0	0	0	0	0	0	0	0
Air	N2_storage	Grapple fixture, flt releasable	11.1134	0	0	0	0	0.5	0	0.5	0	0	0	0	0	0	0	0
Air	N2_storage	Accessories	4.02263	0	0	0	0	0	0	0	0	0	0	0	0	0	0	0
Air	O2_storage	MD Shield Instl	0	0	0	0	0	1	0	0	0	0	0	0	0	0	0	0
Air	O2_storage	Multilayer Insulation Assembly-T #1	0	0	0	0	0	1	0	0	0	0	0	0	0	0	0	0
Air	O2_storage	Multilayer Insulation Assembly-T #2	0	0	0	0	0	1	0	0	0	0	0	0	0	0	0	0
Air	O2_storage	Primary Structure Assembly -HPG ORU	0	0	0	0	0	0.5	0	0	0	0	0	0	0.5	0	0	0
Air	O2_storage	Tank ORU Assembly	0	0	0	0	0	1	0	0	0	0	0	0	0	0	0	0
Air	O2_storage	Utilities Installation - O2/N2 Tank	0	0	0	0	0	0.5	0	0	0	0	0	0	0.5	0	0	0
Air	O2_storage	O2 Bare Tank	56.0785	0	0	0	0	0.95	0	0	0	0	0	0	0.05	0	0	0
Air	O2_storage	HPGA Fluid	48	0	0	0	0	0	0	0	0	0	0	0	0	0	1	0
Air	O2_storage	Handhold, top mounted	0.126719	0	0	0	0	0	1	0	0	0	0	0	0	0	0	0
Air	O2_storage	Handrail 21.941 in custom	0.221758	0	0	0	0	0	1	0	0	0	0	0	0	0	0	0
Air	O2_storage	Handrail, top mounted	0.232318	0	0	0	0	0	1	0	0	0	0	0	0	0	0	0
Air	O2_storage	Grapple fixture, flt releasable	6.52601	0	0	0	0	0.5	0	0.5	0	0	0	0	0	0	0	0
Air	O2_storage	Accessories	2.80675	0	0	0	0	0	0	0	0	0	0	0	0	0	0	0
Air	CO2_reduction_sabatier	Condensing Heat Exchanger	1.46872	0	0	0	0	0.9	0	0.1	0	0	0	0	0	0	0	0
Air	CO2_reduction_sabatier	AAA heat exchanger	2.46536	0	0	0	0	1	0	0	0	0	0	0	0	0	0	0
Air	CO2_reduction_sabatier	ITCS Coolant Water Inlet QD	0.47209	0	0	0	0	1	0	0	0	0	0	0	0	0	0	0
Air	CO2_reduction_sabatier	ITCS Coolant Water Outlet QD	0.35669	0	0	0	0	1	0	0	0	0	0	0	0	0	0	0
Air	CO2_reduction_sabatier	Heat Exchanger Inlet Temp	0.363636	0	0	0	0	1	0	0	0	0	0	0	0	0	0	0
Air	CO2_reduction_sabatier	Heat Exchanger Outlet Temp	0.363636	0	0	0	0	1	0	0	0	0	0	0	0	0	0	0
Air	CO2_reduction_sabatier	Manifold, CO2	4.7209	0	0	0	0	0.95	0.05	0	0	0	0	0	0	0	0	0
Air	CO2_reduction_sabatier	CO2 Inlet Check Valve	0.104909	0	0	0	0	0.9	0.1	0	0	0	0	0	0	0	0	0
Air	CO2_reduction_sabatier	CO2 Inlet Filter	0.0536359	0	0	0	0	1	0	0	0	0	0	0	0	0	0	0
Air	CO2_reduction_sabatier	Pressure sensor, CO2 Inlet	0.409091	0	0	0	0	0	0	0.6	0	0.4	0	0	0	0	0	0
Air	CO2_reduction_sabatier	CO2 Inlet QD	0.47209	0	0	0	0	1	0	0	0	0	0	0	0	0	0	0
Air	CO2_reduction_sabatier	CO2 Inlet Regulator	0.917952	0	0	0	0	0.9	0.05	0	0	0.05	0	0	0	0	0	0
Air	CO2_reduction_sabatier	CO2 Inlet NC Solenoid	0.47209	0	0	0	0	1	0	0	0	0	0	0	0	0	0	0
Air	CO2_reduction_sabatier	CO2 Inlet Flow Control	2.15063	0	0	0	0	0.85	0.05	0	0	0.1	0	0	0	0	0	0
Air	CO2_reduction_sabatier	CO2 Flow Control Orifice	0.0524544	0	0	0	0	1	0	0	0	0	0	0	0	0	0	0
Air	CO2_reduction_sabatier	Delta P Sensor, Flow Sensor CO2	0.909091	0	0	0	0	0	0	0.6	0	0.4	0	0	0	0	0	0
Air	CO2_reduction_sabatier	CO2 Flow Meter Orifice	0.0262272	0	0	0	0	1	0	0	0	0	0	0	0	0	0	0
Air	CO2_reduction_sabatier	Manifold, Hydrogen	4.37994	0	0	0	0	0.95	0.05	0	0	0	0	0	0	0	0	0
Air	CO2_reduction_sabatier	Water Outlet Quick Disconnect	0.47209	0	0	0	0	1	0	0	0	0	0	0	0	0	0	0
Air	CO2_reduction_sabatier	Hydrogen Inlet Check Valve	0.104909	0	0	0	0	0.9	0.1	0	0	0	0	0	0	0	0	0
Air	CO2_reduction_sabatier	Hydrogen Inlet Filter	0.0536359	0	0	0	0	1	0	0	0	0	0	0	0	0	0	0
Air	CO2_reduction_sabatier	H2O Outlet Pressure Sensor	0.818182	0	0	0	0	0	0	0.6	0	0.4	0	0	0	0	0	0
Air	CO2_reduction_sabatier	Hydrogen Inlet Quick Disconnect	0.47209	0	0	0	0	1	0	0	0	0	0	0	0	0	0	0
Air	CO2_reduction_sabatier	Hydrogen Inlet NC Solenoid	0.944179	0	0	0	0	1	0	0	0	0	0	0	0	0	0	0
Air	CO2_reduction_sabatier	Delta P Sensor, Flow Sensor H2	0.909091	0	0	0	0	0	0	0.6	0	0.4	0	0	0	0	0	0
Air	CO2_reduction_sabatier	H2 Flow Meter Orifice	0.0262272	0	0	0	0	1	0	0	0	0	0	0	0	0	0	0
Air	CO2_reduction_sabatier	Manifold, Vent	5.06185	0	0	0	0	0.95	0.05	0	0	0	0	0	0	0	0	0
Air	CO2_reduction_sabatier	Liquid Sensor	1.09091	0	0	0	0	0	0.5	0.5	0	0	0	0	0	0	0	0
Air	CO2_reduction_sabatier	Vent Pressure Sensor	0.818182	0	0	0	0	0	0	0.6	0	0.4	0	0	0	0	0	0
Air	CO2_reduction_sabatier	Vent Outlet Quick Disconnect	0.47209	0	0	0	0	1	0	0	0	0	0	0	0	0	0	0
Air	CO2_reduction_sabatier	Vent Regulator	0.917952	0	0	0	0	0.9	0.05	0	0	0.05	0	0	0	0	0	0
Air	CO2_reduction_sabatier	Vent Relief/Check #1	0.157363	0	0	0	0	1	0	0	0	0	0	0	0	0	0	0
Air	CO2_reduction_sabatier	Vent Relief/Check #2	0.157363	0	0	0	0	1	0	0	0	0	0	0	0	0	0	0
Air	CO2_reduction_sabatier	Vent Outlet NO Solenoid	0.944179	0	0	0	0	1	0	0	0	0	0	0	0	0	0	0
Air	CO2_reduction_sabatier	Water Pressure Sensor	0.818182	0	0	0	0	0	0	0.6	0	0.4	0	0	0	0	0	0
Air	CO2_reduction_sabatier	Water Relief	0.157363	0	0	0	0	1	0	0	0	0	0	0	0	0	0	0
Air	CO2_reduction_sabatier	Water Outlet NC Solenoid	0.47209	0	0	0	0	1	0	0	0	0	0	0	0	0	0	0
Air	CO2_reduction_sabatier	Rotary Water Separator Assembly	4.03899	0	22.6625	22.6625	0	1	0	0	0	0	0	0	0	0	0	0
Air	CO2_reduction_sabatier	Sabatier Reactor Assembly	2.51781	0	3.23749	3.23749	0	0.9	0	0.1	0	0	0	0	0	0	0	0
Air	CO2_reduction_sabatier	Structure (A/R)	9.15329	0	0	0	0	1	0	0	0	0	0	0	0	0	0	0
Air	CO2_reduction_sabatier	Miscellaneous Hardware (Clampts, bolts, etc.) (A/R)	1.77273	0	0	0	0	1	0	0	0	0	0	0	0	0	0	0
Air	CO2_reduction_sabatier	Air Cooling NC Solenoid	0.629453	0	0	0	0	1	0	0	0	0	0	0	0	0	0	0
Air	CO2_reduction_sabatier	Air Inlet Filter	0.107272	0	0	0	0	1	0	0	0	0	0	0	0	0	0	0
Air	CO2_reduction_sabatier	Air Sabatier Orifice	0.0524544	0	0	0	0	1	0	0	0	0	0	0	0	0	0	0
Air	CO2_reduction_sabatier	Heat Exchanger Inlet Duct	0.104909	0	0	0	0	1	0	0	0	0	0	0	0	0	0	0
Air	CO2_reduction_sabatier	Heat Exchanger Outlet Duct	0.104909	0	0	0	0	1	0	0	0	0	0	0	0	0	0	0
Air	CO2_reduction_sabatier	Reactor Inlet Duct	0.209818	0	0	0	0	1	0	0	0	0	0	0	0	0	0	0
Air	CO2_reduction_sabatier	Reactor Outlet Duct	0.104909	0	0	0	0	1	0	0	0	0	0	0	0	0	0	0
Air	CO2_reduction_sabatier	Tubing (A/R)	0.681907	0	0	0	0	1	0	0	0	0	0	0	0	0	0	0
Air	CO2_reduction_sabatier	Harnesses	11.4545	0	0	0	0	0.9	0.05	0	0.05	0	0	0	0	0	0	0
Air	CO2_reduction_sabatier	Valves & Sensors' total power	0	0	7.37494	7.37494	0	0	0	1	0	0	0	0	0	0	0	0
Air	CO2_reduction_sabatier	Mechanical Compressor ORU	18.8836	0	45.3249	45.3249	0	0.9	0.1	0	0	0	0	0	0	0	0	0.001
Air	CO2_reduction_sabatier	Compressor Manifold Assembly	4.61599	0	0	0	0	0.95	0.05	0	0	0	0	0	0	0	0	0
Air	CO2_reduction_sabatier	Controller Assembly	28.5909	0	55	55	0	0	0.2	0.8	0	0	0	0	0	0	0	0
Air	CO2_reduction_sabatier	CO2 Accumulator	10.0266	0.01184	0	0	0	1	0	0	0	0	0	0	0	0	0	0
Air	O2_generation_ISS	Deionizing Bed ORU (Inlet)	7.79254	0.00956004	0	0	0	0.05	0.15	0	0	0	0	0	0	0	0	0.8
Air	O2_generation_ISS	Deionizing Bed ORU (Recirculating)	7.79254	0.00956004	0	0	0	0.05	0.15	0	0	0	0	0	0	0	0	0.8
Air	O2_generation_ISS	Oxygen/Water ORU	36.3956	0.024753	0	0	0	0.333333	0	0	0	0	0	0	0.333333	0	0.333333	0
Air	O2_generation_ISS	Pump ORU	6.45528	0.00597856	23.329	23.329	0	1	0	0	0	0	0	0	0	0	0	0
Air	O2_generation_ISS	Oxygen Phase Separator ORU	21.8326	0.00544478	0	0	0	1	0	0	0	0	0	0	0	0	0	0
Air	O2_generation_ISS	Hydrogen ORU	95.4561	0.0505443	30.7813	30.7813	0	1	0	0	0	0	0	0	0	0	0	0
Air	O2_generation_ISS	Hydrogen Sensor ORU	4.59	0.00344	0	0	0	1	0	0	0	0	0	0	0	0	0	0
Air	O2_generation_ISS	Process Controller	40.09	0.1359	148	148	0	0.3	0.001	0.7	0	0	0	0	0	0	0	0
Air	O2_generation_ISS	Power Supply Module (PSM)	13.4466	0.0210285	1069.25	0	0	0.7	0	0	0	0	0.1	0.1	0	0	0	0.1
Air	Fire_det_sup	Fire Detection Assembly	1.5	0.0028	1.48	1.48	0.029589	0.05	0.9	0.05	0	0	0	0	0	0	0	0
Air	Fire_det_sup	Portable Fire Extinguisher	6.8	0.0405	0	0	0	0.6	0	0	0	0	0	0	0.2	0	0	0.2
Air	ACO2R	Regenerator 1	45.3	0.17	397	397	0	0.98	0.01	0	0	0.01	0	0	0	0	0	0
Air	ACO2R	Metox Canisters	136	0.057	0	0	0	1	0	0	0	0	0	0	0	0	0	0
Air	TCCS_ISS	Activated charcoal bed	4.63405	0.00956869	0	0	0	0	0.5	0	0	0	0	0.5	0	0	0	0
Air	TCCS_ISS	Blower Assembly	2.48571	0.00488571	30.3929	30.3929	0	0.8	0	0.2	0	0	0	0	0	0	0	0
Air	TCCS_ISS	Flow Meter Assembly	1.1	0.0003	11.5	11.5	0	0.7	0.1	0.1	0	0.1	0	0	0	0	0	0
Air	TCCS_ISS	Catalytic Oxidizer Assembly	8.45714	0.0185143	92.1905	92.1905	0	1	0	0	0	0	0	0	0	0	0	0
Air	TCCS_ISS	LiOH Sorbent bed assembly	0.31439	0.000605775	0	0	0	0.07	0.03	0	0	0	0	0.9	0	0	0	0
Air	TCCS_ISS	Electrical interface assembly	4.5	0.00487	7.6	7.6	0	0	0	1	0	0	0	0	0	0	0	0
Waste	PMWC	Aluminum Compaction cylinder	9.40127	0.0233839	0	0	180	1	0	0	0	0	0	0	0	0	0	0
Waste	PMWC	Band-type heating unit	0	0	136.341	0	0	0.9	0	0	0	0	0	0.1	0	0	0	0
Waste	PMWC	Commercial Lightweight, oil-less, compressor/vacuum pump	0	0	2.70748	0	0	0.9	0	0.1	0	0	0	0	0	0	0	0
Waste	PMWC	Temperature sensor	0.224	0	0	0	0	0	0	0.6	0	0.4	0	0	0	0	0	0
Waste	PMWC	Pressure sensor	0.304	0	0.33	0	0	0.1	0.25	0.65	0	0	0	0	0	0	0	0
Waste	PMWC	Housing & Mounting Equipment	23.8611	0.477222	0	0	0	1	0	0	0	0	0	0	0	0	0	0
Waste	PMWC	Condensing Heat Exchanger	1.91386	0.003803	0	0	0	1	0	0	0	0	0	0	0	0	0	0
Waste	PMWC	Cooling system	0	0	0	0	0	1	0	0	0	0	0	0	0	0	0	0
Waste	Waste_storage	Low Density PolyEthylene Box	17.7049	0.491803	0	0	0	0	1	0	0	0	0	0	0	0	0	0
Waste	Waste_collection_ISS	Commode/Urinal	58.4	0.3	0	0	29.589	0	1	0	0	0	0	0	0	0	0	0
Waste	Waste_collection_ISS	Fan	0	0	102	102	0	1	0	0	0	0	0	0	0	0	0	0
Waste	Waste_collection_ISS	Urine Separator	0	0	125	125	0	0.9	0	0.09	0.01	0	0	0	0	0	0	0
Waste	Waste_collection_ISS	Urine Vent Heater	0	0	14	14	0	1	0	0	0	0	0	0	0	0	0	0
Waste	Waste_collection_ISS	Fecal Bags	19.6364	0.21924	0	0	0	0	0	0	1	0	0	0	0	0	0	0
Waste	Waste_collection_ISS	Wipes, Dry	6.54545	0.0884901	0	0	0	0	0	0	1	0	0	0	0	0	0	0
Waste	Waste_collection_ISS	Wipes, Wet	10.2273	0.0530941	0	0	0	0	0	0	0.6	0	0	0	0	0	0.4	0
Waste	Waste_collection_ISS	Wipes, Toilet Tissue	3.53455	0.0431555	0	0	0	0	0	0	0	0	0	0	0	0	0	1
Waste	Waste_collection_ISS	Gloves	5.59636	0.0254852	0	0	0	0	1	0	0	0	0	0	0	0	0	0
Waste	Waste_collection_ISS	Fecal Bags Odor Lids	29.4545	0.2754	0	0	0	0	1	0	0	0	0	0	0	0	0	0
Waste	Waste_collection_ISS	Fecal collection Canisters	35.0649	0.459	0	0	0	0	0.9	0	0.1	0	0	0	0	0	0	0
Waste	Waste_collection_ISS	Fecal collection Canisters lids	17.5325	0.0717429	0	0	0	0	1	0	0	0	0	0	0	0	0	0
Waste	Waste_collection_ISS	Urine Prefilters	30.6818	0.16686	0	0	0	1	0	0	0	0	0	0	0	0	0	0
Waste	Waste_collection_ISS	Urine Filters	4.38312	0.0354086	0	0	0	0	0	0	1	0	0	0	0	0	0	0
Waste	Waste_collection_ISS	Urine Funnels	0	0	0	0	0	1	0	0	0	0	0	0	0	0	0	0
Waste	Waste_collection_ISS	Flush Water Transfer Bags	5.61039	0.0783	0	0	0	0	0.3	0	0.7	0	0	0	0	0	0	0
Waste	TCCS_ISS_x3	Activated charcoal bed	9.2681	0.0191374	0	0	0	0	0.5	0	0	0	0	0	0	0	0	0.5
Waste	TCCS_ISS_x4	Blower Assembly	4.97143	0.00977143	60.7857	60.7857	0	0.8	0	0.2	0	0	0	0	0	0	0	0
Waste	TCCS_ISS_x5	Flow Meter Assembly	2.2	0.0006	23	23	0	0.7	0.1	0.1	0	0.1	0	0	0	0	0	0
Waste	TCCS_ISS_x6	Catalytic Oxidizer Assembly	16.9143	0.0370286	184.381	184.381	0	1	0	0	0	0	0	0	0	0	0	0
Waste	TCCS_ISS_x7	LiOH Sorbent bed assembly	0.628779	0.00121155	0	0	0	0.07	0.03	0	0	0	0	0.9	0	0	0	0
Waste	TCCS_ISS_x8	Electrical interface assembly	9	0.00974	15.2	15.2	0	0	0	1	0	0	0	0	0	0	0	0
Water	Water_recovery_system	MLS Filter ORU	3.32412	0.00466383	0	0	0	0.5	0	0.5	0	0	0	0	0	0	0	0
Water	Water_recovery_system	Particulate Filter ORU	17.2235	0.0437973	0	0	0	0.9	0	0	0	0	0	0	0	0	0	0.1
Water	Water_recovery_system	Multifiltration Bed #1 & #2 ORUs	0	0	0	0	0	0.07	0.03	0	0	0	0	0	0	0	0.9	0
Water	Water_recovery_system	Sensor ORU	3.64	0.0093	2.13	2.13	0	0	0.6	0.2	0	0.2	0	0	0	0	0	0
Water	Water_recovery_system	Piping	5.36738	0.0111729	0	0	0	1	0	0	0	0	0	0	0	0	0	0
Water	Water_recovery_system	Pump/MLS ORU	30.2764	0.0949697	51.1686	51.1686	0	0.5	0	0.5	0	0	0	0	0	0	0	0
Water	Water_recovery_system	Catalytic Reactor & Preheeater ORU	0	0	0	0	0	1	0	0	0	0	0	0	0	0	0	0
Water	Water_recovery_system	Oxygen Filter	0	0	0	0	0	0.5	0.5	0	0	0	0	0	0	0	0	0
Water	Water_recovery_system	Microbial Check Valve	0	0	0	0	0	0.99	0	0	0	0	0	0	0	0	0	0.01
Water	Water_recovery_system	Gas Separator ORU	43.1143	0.0939839	132.331	132.331	0	0.9	0.1	0	0	0	0	0	0	0	0	0.001
Water	Water_recovery_system	Hygiene H2O Tank	95.9008	0.178657	7.04904	7.04904	0	0	1	0	0	0	0	0	0	0	0	0
Water	Water_recovery_system	Product H2O Tank	53.9695	0.191692	7.84786	7.84786	0	0	1	0	0	0	0	0	0	0	0	0
Water	Water_recovery_system	Process Controller	36.91	0.0838	156.18	156.18	0	0.3	0.001	0.7	0	0	0	0	0	0	0	0
Water	Water_recovery_system	Reactor Health Sensor	8.64	0.0422	4.72	4.72	0	0.1	0.2	0.6	0	0	0	0.1	0	0	0	0
Water	Water_recovery_system	H2O Delivery System	42.9719	0.10669	2.88223	2.88223	0	0.9	0	0	0	0	0.1	0	0	0	0	0
Water	WRS	Ion Exchange Bed	2.78408	0.00378912	0	0	0	0.07	0.03	0	0	0	0	0	0	0	0.9	0	https://ntrs.nasa.gov/api/citations/20140002688/downloads/20140002688.pdf
Water	Urinary_primary_processing_ISS	Pressure Control & Pump (PCPA)	27.1388	0.0442231	5.72541	5.72541	0	0.7	0.2	0.1	0	0	0	0	0	0	0	0
Water	Urinary_primary_processing_ISS	Fluid Control & Pump (FCPA)	27.6349	0.0438601	8.30458	8.30458	0	0.7	0.2	0.1	0	0	0	0	0	0	0	0
Water	Urinary_primary_processing_ISS	Recycle Filter Tank (RFTA)	11.5488	0.0616461	0	0	0	0	1	0	0	0	0	0	0	0	0	0
Water	Urinary_primary_processing_ISS	Wastewater Storage Tank Assembly (WSTA)	28.9537	0.0248641	0.0819868	0.0819868	0	1	0	0	0	0	0	0	0	0	0	0
Water	Urinary_primary_processing_ISS	Distillation Assembly (DA)	45.8142	0.091471	79.3496	79.3496	0	0.6	0	0.1	0	0.3	0	0	0	0	0	0
Water	Urinary_primary_processing_ISS	Separator Plumbing Assembly (SPA)	9.87306	0.0150637	0	0	0	0.99	0.01	0	0	0	0	0	0	0	0	0
Water	Urinary_primary_processing_ISS	Power Module (Included in FCA)	0	0	0	0	0	0	0	0	0	0	0	0	0	0	0	0
Water	Urinary_primary_processing_ISS	Firmware Controller Assembly (Data module, power module)	24.09	0.0286	150.09	150.09	0	0.8	0	0.2	0	0	0	0	0	0	0	0
Water	Urinary_primary_processing_ISS	Piping	7.54817	0.0140564	0	0	0	1	0	0	0	0	0	0	0	0	0	0
Water	Volatile_removal_assembly	Catalytic Reactor & Preheeater ORU	0	0	90.481	90.481	0	1	0	0	0	0	0	0	0	0	0	0
Water	Volatile_removal_assembly	Gas Separator ORU	24.5428	0.0535004	42.5412	42.5412	0	0.9	0.1	0	0	0	0	0	0	0	0	0.001
Water	Volatile_removal_assembly	Oxygen Filter	0	0	0	0	0	0.5	0.5	0	0	0	0	0	0	0	0	0
Water	Volatile_removal_assembly	Piping	1.26268	0.00267502	0	0	0	1	0	0	0	0	0	0	0	0	0	0
Water	Potable_water_tank	Product H2O Tank	101.116	0.35915	13.6451	13.6451	0	0	1	0	0	0	0	0	0	0	0	0
Water	Potable_water_tank	H2O Stored	256.986	0	0	0	0	0	0	0	0	0	0	0	0	0	1	0
Food	Food_storage	Packaging						0.01	0.99	0	0	0	0	0	0	0	0	0	https://www.eriesd.org/cms/lib/PA01001942/Centricity/Domain/1041/Space%20food%20packagingbrochure.pdf
Food	Food_storage	Lockers/Storage	218.862	3.05389	0	0	0	0.25	0.25	0	0	0	0	0	0	0.5	0	0
Food	Food_processing	Rehydration Unit and Conduction Oven	36.3	0.094	960	960	0	0.7	0.05	0.25	0	0	0	0	0	0	0	0
Thermal	CCAA	Inlet ORU	0	0	312.645	312.645	0	1	0	0	0	0	0	0	0	0	0	0
Thermal	CCAA	Condensing heat exchanger	37.6915	0.07476	0	0	0	1	0	0	0	0	0	0	0	0	0	0
Thermal	CCAA	Water separator	6.41309	0.0442449	10.1871	10.1871	0	0.99	0	0	0	0	0	0	0	0	0	0.01
Thermal	CCAA	Temp. Control & Check Valve	4.08878	0.0277492	0.0620976	0.0620976	0	0.8	0.15	0	0.05	0	0	0	0	0	0	0
Thermal	CCAA	Electrical Interface Box (EIB)	4.1	0.0113	8	8	0	0.9	0	0.1	0	0	0	0	0	0	0	0
Thermal	CCAA	Temp. Sensor	0.24	0.0006	0.01	0.01	0	0	0	0.6	0	0.4	0	0	0	0	0	0
Thermal	CCAA	Liquid Sensor	0.47	0.0006	0.01	0.01	0	0	0.5	0.5	0	0	0	0	0	0	0	0
Thermal	CCAA	Fan Delta P Sensor	0.4	0.00024	0.2	0.2	0	0.9	0	0.1	0	0	0	0	0	0	0	0
Thermal	CCAA	Pressure Sensor	0.3	6e-05	0.2	0.2	0	0.1	0.25	0.65	0	0	0	0	0	0	0	0
Thermal	Atmosphere_microbial_control	HEPA Filter Element	49.22	0.1886	0	0	0.986301	0.7	0	0	0	0.3	0	0	0	0	0	0
Thermal	Atmosphere_microbial_control	Catalytic Filter element	54	0.082	0	0	0	0	0.7	0	0.3	0	0	0	0	0	0	0
Thermal	Atmosphere_circulation	IMV Fan	4.77	0.0093	55	55	0	0.9	0.05	0	0.05	0	0	0	0	0	0	0
Thermal	Atmosphere_circulation	IMV Valve	5.1	0.0099	6	6	0	1	0	0	0	0	0	0	0	0	0	0
Thermal	AAA	Avionics Air Assembly	12.4	0.034	175	175	0	0.8	0.1	0	0.1	0	0	0	0	0	0	0
Thermal	ITCS	ITCS	211.83	0.36	2585.1	2585.1	0	0.9	0	0.1	0	0	0	0	0	0	0	0	https://www.nasa.gov/pdf/473486main_iss_atcs_overview.pdf

## Sheet: case 2 mars 1 trip
System	Subsystem	Item	Mass, kg	Volume, m3	Power, watts	Cooling, watts	Crew time, MMH/yr	fraction Structural Metal	fraction Plastic	fraction Electronics	fraction Fabric	fraction Glass	fraction Rubber	fraction Ceramics	fraction Gas	fraction biomass	fraction Water	fraction Other
Air	APC	Vent/Relief Valve	5.4	0.0141	0	0	0	1	0	0	0	0	0	0	0	0	0	0
Air	APC	Pressure control panel	11.2	0.034	18	18	0	0.2	0.1	0.7	0	0	0	0	0	0	0	0
Air	APC	Manual Pressure Equalization Valve	9.6	0.0112	0	0	0	1	0	0	0	0	0	0	0	0	0	0
Air	APC	Positive Pressure Relief Valve	1.8	0.0034	0	0	0	1	0	0	0	0	0	0	0	0	0	0
Air	APC	Negative Pressure Relief Valve	3	0.0093	0	0	0	1	0	0	0	0	0	0	0	0	0	0
Air	APC	Nitrogen Interface Assembly	7.5	0.0122	5.5	5.5	0	1	0	0	0	0	0	0	0	0	0	0
Air	APC	Vacuum Access Jumper 5-ft	0.7	0.00043	0	0	0	0	0	1	0	0	0	0	0	0	0	0
Air	APC	Vacuum Access Jumper 35-ft	3.2	0.003	0	0	0	0	0	1	0	0	0	0	0	0	0	0
Air	ACMA	Verification Gas Assembly	5.4	0.0136	0.1	0.1	0	0.5	0	0	0	0	0	0	0.5	0	0	0
Air	ACMA	Mass Spectrometer	13.9	0.0238	31.8	31.8	0	0.5	0	0.5	0	0	0	0	0	0	0	0
Air	ACMA	Sample Pump	3.4	0.0045	4	4	0	1	0	0	0	0	0	0	0	0	0	0
Air	ACMA	Sample Distributor	2.1	0.0045	0.1	0.1	0	0.95	0	0	0.05	0	0	0	0	0	0	0
Air	ACMA	Data & Control	8	0.0141	34.9	34.9	0	0.5	0	0.5	0	0	0	0	0	0	0	0
Air	ACMA	Low Volt. Power supply	5.7	0.0054	30.8	30.8	0	0.7	0	0	0	0	0.1	0.1	0	0	0	0.1
Air	ACMA	Chassis	15.8	0.0238	0	0	0	1	0	0	0	0	0	0	0	0	0	0
Air	ACMA	Inlet Valve Assembly	0	0	0	0	0	0.9	0	0	0.01	0	0	0	0	0	0.09	0
Air	ACMA	EMI Filter	0	0	1.8	1.8	0	0.98	0.02	0	0	0	0	0	0	0	0	0
Air	SDS	3-way solenoid valves	31.5	0.0345	0	0	0	1	0	0	0	0	0	0	0	0	0	0
Air	SDS	Manual valves	2.53	0.0066	0	0	0	1	0	0	0	0	0	0	0	0	0	0
Air	SDS	Sample probes	1.08	0.00024	0	0	0	1	0	0	0	0	0	0	0	0	0	0
Air	CO2_removal_4BMS	Air Selector Valve	12.6497	0.00827099	0.684802	0.684802	2.73973	0.9	0	0	0	0	0	0	0.1	0	0	0
Air	CO2_removal_4BMS	Desiccant Bed	23.6941	0.24242	0	0	0.657534	0.4	0	0	0	0	0	0.6	0	0	0	0
Air	CO2_removal_4BMS	Adsorbent Bed	32.3226	0	564.277	564.277	0	0.5	0	0	0.2	0	0	0.3	0	0	0	0
Air	CO2_removal_4BMS	Air Check Valve	0.162176	0	0	0	0	1	0	0	0	0	0	0	0	0	0	0
Air	CO2_removal_4BMS	Heater Controller	6.6	0.0016	38	38	0.0273973	0.8	0	0.2	0	0	0	0	0	0	0	0
Air	CO2_removal_4BMS	Air Blower	0.810881	0.020272	39.7185	39.7185	0.178082	1	0	0	0	0	0	0	0	0	0	0
Air	CO2_removal_4BMS	Precooler	2.18938	0	0	0	0	1	0	0	0	0	0	0	0	0	0	0
Air	CO2_removal_4BMS	Blower/precooler Motor Controller	1.3	0	5	5	0	0.6	0	0.4	0	0	0	0	0	0	0	0
Air	CO2_removal_4BMS	CO2 Pump	6.64922	0.00364896	13.0112	13.0112	0.109589	0.99	0	0	0	0	0	0	0	0	0	0.01
Air	CO2_removal_4BMS	CO2 Pump Motor Controller	1.3	0.0057	2	2	0.0136986	0.3	0	0.7	0	0	0	0	0	0	0	0
Air	CO2_removal_4BMS	Temperature Sensor	0.399	0	1	1	0	0	0	0.6	0	0.4	0	0	0	0	0	0
Air	CO2_removal_4BMS	Differential Pressure Sensor	0.2	0	1	1	0	0.1	0.25	0.65	0	0	0	0	0	0	0	0
Air	CO2_removal_4BMS	Absolute Pressure Sensor	0.2	0	1	1	0	0.75	0	0	0	0	0	0.25	0	0	0	0
Air	CO2_removal_4BMS	Electrical Harness	4.5	0	0	0	0	0.9	0.05	0	0.05	0	0	0	0	0	0	0
Air	CO2_removal_4BMS	Plumbing	4.7842	0	0	0	0	1	0	0	0	0	0	0	0	0	0	0
Air	CO2_removal_4BMS	Support Structure	29.2728	0	0	0	0	1	0	0	0	0	0	0	0	0	0	0
Air	CO2_removal_4BMS	Fluid Disconnects	1.94611	0	0	0	0	1	0	0	0	0	0	0	0	0	0	0
Air	CO2_removal_4BMS	Electronics coldplate	2.67591	0	0	0	0	1	0	0	0	0	0	0	0	0	0	0
Air	CO2_removal_4BMS	Electronics Interface Plate	1.6	0	0	0	0	1	0	0	0	0	0	0	0	0	0	0
Air	N2_storage	MD Shield Instl	0	0	0	0	0	1	0	0	0	0	0	0	0	0	0	0
Air	N2_storage	Multilayer Insulation Assembly-T #1	0	0	0	0	0	1	0	0	0	0	0	0	0	0	0	0
Air	N2_storage	Multilayer Insulation Assembly-T #2	0	0	0	0	0	1	0	0	0	0	0	0	0	0	0	0
Air	N2_storage	Primary Structure Assembly -HPG ORU	0	0	0	0	0	0.5	0	0	0	0	0	0	0.5	0	0	0
Air	N2_storage	Tank ORU Assembly	0	0	0	0	0	1	0	0	0	0	0	0	0	0	0	0
Air	N2_storage	Utilities Installation - O2/N2 Tank	0	0	0	0	0	0.5	0	0	0	0	0	0	0.5	0	0	0
Air	N2_storage	N2 Bare Tank	163.98	0	0	0	0	0.9	0	0	0	0	0.05	0	0.05	0	0	0
Air	N2_storage	HPGA Fluid	144.731	0	0	0	0	0	0	0	0	0	0	0	0	0	1	0
Air	N2_storage	Handhold, top mounted	0.382085	0	0	0	0	0	1	0	0	0	0	0	0	0	0	0
Air	N2_storage	Handrail 21.941 in custom	0.668649	0	0	0	0	0	1	0	0	0	0	0	0	0	0	0
Air	N2_storage	Handrail, top mounted	0.700489	0	0	0	0	0	1	0	0	0	0	0	0	0	0	0
Air	N2_storage	Grapple fixture, flt releasable	19.6774	0	0	0	0	0.5	0	0.5	0	0	0	0	0	0	0	0
Air	N2_storage	Accessories	8.20724	0	0	0	0	0	0	0	0	0	0	0	0	0	0	0
Air	O2_storage	MD Shield Instl	0	0	0	0	0	1	0	0	0	0	0	0	0	0	0	0
Air	O2_storage	Multilayer Insulation Assembly-T #1	0	0	0	0	0	1	0	0	0	0	0	0	0	0	0	0
Air	O2_storage	Multilayer Insulation Assembly-T #2	0	0	0	0	0	1	0	0	0	0	0	0	0	0	0	0
Air	O2_storage	Primary Structure Assembly -HPG ORU	0	0	0	0	0	0.5	0	0	0	0	0	0	0.5	0	0	0
Air	O2_storage	Tank ORU Assembly	0	0	0	0	0	1	0	0	0	0	0	0	0	0	0	0
Air	O2_storage	Utilities Installation - O2/N2 Tank	0	0	0	0	0	0.5	0	0	0	0	0	0	0.5	0	0	0
Air	O2_storage	O2 Bare Tank	112.189	0	0	0	0	0.95	0	0	0	0	0	0	0.05	0	0	0
Air	O2_storage	HPGA Fluid	72.7976	0	0	0	0	0	0	0	0	0	0	0	0	0	1	0
Air	O2_storage	Handhold, top mounted	0.192184	0	0	0	0	0	1	0	0	0	0	0	0	0	0	0
Air	O2_storage	Handrail 21.941 in custom	0.336321	0	0	0	0	0	1	0	0	0	0	0	0	0	0	0
Air	O2_storage	Handrail, top mounted	0.352337	0	0	0	0	0	1	0	0	0	0	0	0	0	0	0
Air	O2_storage	Grapple fixture, flt releasable	9.89746	0	0	0	0	0.5	0	0.5	0	0	0	0	0	0	0	0
Air	O2_storage	Accessories	5.61509	0	0	0	0	0	0	0	0	0	0	0	0	0	0	0
Air	CO2_reduction_sabatier	Condensing Heat Exchanger	1.48461	0	0	0	0	0.9	0	0.1	0	0	0	0	0	0	0	0
Air	CO2_reduction_sabatier	AAA heat exchanger	2.49202	0	0	0	0	1	0	0	0	0	0	0	0	0	0	0
Air	CO2_reduction_sabatier	ITCS Coolant Water Inlet QD	0.477195	0	0	0	0	1	0	0	0	0	0	0	0	0	0	0
Air	CO2_reduction_sabatier	ITCS Coolant Water Outlet QD	0.360547	0	0	0	0	1	0	0	0	0	0	0	0	0	0	0
Air	CO2_reduction_sabatier	Heat Exchanger Inlet Temp	0.363636	0	0	0	0	1	0	0	0	0	0	0	0	0	0	0
Air	CO2_reduction_sabatier	Heat Exchanger Outlet Temp	0.363636	0	0	0	0	1	0	0	0	0	0	0	0	0	0	0
Air	CO2_reduction_sabatier	Manifold, CO2	4.77195	0	0	0	0	0.95	0.05	0	0	0	0	0	0	0	0	0
Air	CO2_reduction_sabatier	CO2 Inlet Check Valve	0.106043	0	0	0	0	0.9	0.1	0	0	0	0	0	0	0	0	0
Air	CO2_reduction_sabatier	CO2 Inlet Filter	0.0555267	0	0	0	0	1	0	0	0	0	0	0	0	0	0	0
Air	CO2_reduction_sabatier	Pressure sensor, CO2 Inlet	0.409091	0	0	0	0	0	0	0.6	0	0.4	0	0	0	0	0	0
Air	CO2_reduction_sabatier	CO2 Inlet QD	0.477195	0	0	0	0	1	0	0	0	0	0	0	0	0	0	0
Air	CO2_reduction_sabatier	CO2 Inlet Regulator	0.927879	0	0	0	0	0.9	0.05	0	0	0.05	0	0	0	0	0	0
Air	CO2_reduction_sabatier	CO2 Inlet NC Solenoid	0.477195	0	0	0	0	1	0	0	0	0	0	0	0	0	0	0
Air	CO2_reduction_sabatier	CO2 Inlet Flow Control	2.17389	0	0	0	0	0.85	0.05	0	0	0.1	0	0	0	0	0	0
Air	CO2_reduction_sabatier	CO2 Flow Control Orifice	0.0530216	0	0	0	0	1	0	0	0	0	0	0	0	0	0	0
Air	CO2_reduction_sabatier	Delta P Sensor, Flow Sensor CO2	0.909091	0	0	0	0	0	0	0.6	0	0.4	0	0	0	0	0	0
Air	CO2_reduction_sabatier	CO2 Flow Meter Orifice	0.0265108	0	0	0	0	1	0	0	0	0	0	0	0	0	0	0
Air	CO2_reduction_sabatier	Manifold, Hydrogen	4.42731	0	0	0	0	0.95	0.05	0	0	0	0	0	0	0	0	0
Air	CO2_reduction_sabatier	Water Outlet Quick Disconnect	0.477195	0	0	0	0	1	0	0	0	0	0	0	0	0	0	0
Air	CO2_reduction_sabatier	Hydrogen Inlet Check Valve	0.106043	0	0	0	0	0.9	0.1	0	0	0	0	0	0	0	0	0
Air	CO2_reduction_sabatier	Hydrogen Inlet Filter	0.0555267	0	0	0	0	1	0	0	0	0	0	0	0	0	0	0
Air	CO2_reduction_sabatier	H2O Outlet Pressure Sensor	0.818182	0	0	0	0	0	0	0.6	0	0.4	0	0	0	0	0	0
Air	CO2_reduction_sabatier	Hydrogen Inlet Quick Disconnect	0.477195	0	0	0	0	1	0	0	0	0	0	0	0	0	0	0
Air	CO2_reduction_sabatier	Hydrogen Inlet NC Solenoid	0.95439	0	0	0	0	1	0	0	0	0	0	0	0	0	0	0
Air	CO2_reduction_sabatier	Delta P Sensor, Flow Sensor H2	0.909091	0	0	0	0	0	0	0.6	0	0.4	0	0	0	0	0	0
Air	CO2_reduction_sabatier	H2 Flow Meter Orifice	0.0265108	0	0	0	0	1	0	0	0	0	0	0	0	0	0	0
Air	CO2_reduction_sabatier	Manifold, Vent	5.11659	0	0	0	0	0.95	0.05	0	0	0	0	0	0	0	0	0
Air	CO2_reduction_sabatier	Liquid Sensor	1.09091	0	0	0	0	0	0.5	0.5	0	0	0	0	0	0	0	0
Air	CO2_reduction_sabatier	Vent Pressure Sensor	0.818182	0	0	0	0	0	0	0.6	0	0.4	0	0	0	0	0	0
Air	CO2_reduction_sabatier	Vent Outlet Quick Disconnect	0.477195	0	0	0	0	1	0	0	0	0	0	0	0	0	0	0
Air	CO2_reduction_sabatier	Vent Regulator	0.927879	0	0	0	0	0.9	0.05	0	0	0.05	0	0	0	0	0	0
Air	CO2_reduction_sabatier	Vent Relief/Check #1	0.159065	0	0	0	0	1	0	0	0	0	0	0	0	0	0	0
Air	CO2_reduction_sabatier	Vent Relief/Check #2	0.159065	0	0	0	0	1	0	0	0	0	0	0	0	0	0	0
Air	CO2_reduction_sabatier	Vent Outlet NO Solenoid	0.95439	0	0	0	0	1	0	0	0	0	0	0	0	0	0	0
Air	CO2_reduction_sabatier	Water Pressure Sensor	0.818182	0	0	0	0	0	0	0.6	0	0.4	0	0	0	0	0	0
Air	CO2_reduction_sabatier	Water Relief	0.159065	0	0	0	0	1	0	0	0	0	0	0	0	0	0	0
Air	CO2_reduction_sabatier	Water Outlet NC Solenoid	0.477195	0	0	0	0	1	0	0	0	0	0	0	0	0	0	0
Air	CO2_reduction_sabatier	Rotary Water Separator Assembly	4.08267	0	22.8444	22.8444	0	1	0	0	0	0	0	0	0	0	0	0
Air	CO2_reduction_sabatier	Sabatier Reactor Assembly	2.54504	0	3.26349	3.26349	0	0.9	0	0.1	0	0	0	0	0	0	0	0
Air	CO2_reduction_sabatier	Structure (A/R)	9.25228	0	0	0	0	1	0	0	0	0	0	0	0	0	0	0
Air	CO2_reduction_sabatier	Miscellaneous Hardware (Clampts, bolts, etc.) (A/R)	1.77273	0	0	0	0	1	0	0	0	0	0	0	0	0	0	0
Air	CO2_reduction_sabatier	Air Cooling NC Solenoid	0.63626	0	0	0	0	1	0	0	0	0	0	0	0	0	0	0
Air	CO2_reduction_sabatier	Air Inlet Filter	0.111053	0	0	0	0	1	0	0	0	0	0	0	0	0	0	0
Air	CO2_reduction_sabatier	Air Sabatier Orifice	0.0530216	0	0	0	0	1	0	0	0	0	0	0	0	0	0	0
Air	CO2_reduction_sabatier	Heat Exchanger Inlet Duct	0.106043	0	0	0	0	1	0	0	0	0	0	0	0	0	0	0
Air	CO2_reduction_sabatier	Heat Exchanger Outlet Duct	0.106043	0	0	0	0	1	0	0	0	0	0	0	0	0	0	0
Air	CO2_reduction_sabatier	Reactor Inlet Duct	0.212087	0	0	0	0	1	0	0	0	0	0	0	0	0	0	0
Air	CO2_reduction_sabatier	Reactor Outlet Duct	0.106043	0	0	0	0	1	0	0	0	0	0	0	0	0	0	0
Air	CO2_reduction_sabatier	Tubing (A/R)	0.689281	0	0	0	0	1	0	0	0	0	0	0	0	0	0	0
Air	CO2_reduction_sabatier	Harnesses	11.4545	0	0	0	0	0.9	0.05	0	0.05	0	0	0	0	0	0	0
Air	CO2_reduction_sabatier	Valves & Sensors' total power	0	0	7.63492	7.63492	0	0	0	1	0	0	0	0	0	0	0	0
Air	CO2_reduction_sabatier	Mechanical Compressor ORU	19.0878	0	45.6889	45.6889	0	0.9	0.1	0	0	0	0	0	0	0	0	0.001
Air	CO2_reduction_sabatier	Compressor Manifold Assembly	4.6659	0	0	0	0	0.95	0.05	0	0	0	0	0	0	0	0	0
Air	CO2_reduction_sabatier	Controller Assembly	28.5909	0	55	55	0	0	0.2	0.8	0	0	0	0	0	0	0	0
Air	CO2_reduction_sabatier	CO2 Accumulator	10.135	0.011968	0	0	0	1	0	0	0	0	0	0	0	0	0	0
Air	OGS_ISS	Deionizing Bed ORU (Inlet)	8.06724	0.00989705	0	0	0	0.05	0.15	0	0	0	0	0	0	0	0	0.8
Air	OGS_ISS	Deionizing Bed ORU (Recirculating)	8.06724	0.00989705	0	0	0	0.05	0.15	0	0	0	0	0	0	0	0	0.8
Air	OGS_ISS	Oxygen/Water ORU	36.8153	0.0250383	0	0	0	0.333333	0	0	0	0	0	0	0.333333	0	0.333333	0
Air	OGS_ISS	Pump ORU	6.5297	0.00604749	24.1514	24.1514	0	1	0	0	0	0	0	0	0	0	0	0
Air	OGS_ISS	Oxygen Phase Separator ORU	22.0843	0.00550756	0	0	0	1	0	0	0	0	0	0	0	0	0	0
Air	OGS_ISS	Hydrogen ORU	96.5566	0.0511271	31.8665	31.8665	0	1	0	0	0	0	0	0	0	0	0	0
Air	OGS_ISS	Hydrogen Sensor ORU	4.59	0.00344	0	0	0	1	0	0	0	0	0	0	0	0	0	0
Air	OGS_ISS	Process Controller	40.09	0.1359	148	148	0	0.3	0.001	0.7	0	0	0	0	0	0	0	0
Air	OGS_ISS	Power Supply Module (PSM)	13.9206	0.0217698	1106.94	553.47	0	0.7	0	0	0	0	0.1	0.1	0	0	0	0.1
Air	Fire_det_sup	Fire Detection Assembly	1.5	0.0028	1.48	1.48	0.0821918	0.05	0.9	0.05	0	0	0	0	0	0	0	0
Air	Fire_det_sup	Portable Fire Extinguisher	6.8	0.0405	0	0	0	0.6	0	0	0	0	0	0	0.2	0	0	0.2
Air	ACO2R	Regenerator 1	45.3	0.17	397	397	0	0.98	0.01	0	0	0.01	0	0	0	0	0	0
Air	ACO2R	Metox Canisters	136	0.057	0	0	0	1	0	0	0	0	0	0	0	0	0	0
Air	TCCS_ISS	Activated charcoal bed	12.8724	0.0265797	0	0	0	0	0.5	0	0	0	0	0.5	0	0	0	0
Air	TCCS_ISS	Blower Assembly	2.48571	0.00488571	30.3929	30.3929	0	0.8	0	0.2	0	0	0	0	0	0	0	0
Air	TCCS_ISS	Flow Meter Assembly	1.1	0.0003	11.5	11.5	0	0.7	0.1	0.1	0	0.1	0	0	0	0	0	0
Air	TCCS_ISS	Catalytic Oxidizer Assembly	8.45714	0.0185143	92.1905	92.1905	0	1	0	0	0	0	0	0	0	0	0	0
Air	TCCS_ISS	LiOH Sorbent bed assembly	0.873304	0.00168271	0	0	0	0.07	0.03	0	0	0	0	0.9	0	0	0	0
Air	TCCS_ISS	Electrical interface assembly	4.5	0.00487	7.6	7.6	0	0	0	1	0	0	0	0	0	0	0	0
Waste	PMWC	Aluminum Compaction cylinder	9.41404	0.0234156	0	0	500	1	0	0	0	0	0	0	0	0	0	0
Waste	PMWC	Band-type heating unit	0	0	162.389	0	0	0.9	0	0	0	0	0	0.1	0	0	0	0
Waste	PMWC	Commercial Lightweight, oil-less, compressor/vacuum pump	0	0	3.22474	0	0	0.9	0	0.1	0	0	0	0	0	0	0	0
Waste	PMWC	Temperature sensor	0.224	0	0	0	0	0	0	0.6	0	0.4	0	0	0	0	0	0
Waste	PMWC	Pressure sensor	0.304	0	0.33	0	0	0.1	0.25	0.65	0	0	0	0	0	0	0	0
Waste	PMWC	Housing & Mounting Equipment	23.8935	0.47787	0	0	0	1	0	0	0	0	0	0	0	0	0	0
Waste	PMWC	Condensing Heat Exchanger	2.85647	0.00567605	0	0	0	1	0	0	0	0	0	0	0	0	0	0
Waste	PMWC	Cooling system	0	0	144.973	144.973	0	1	0	0	0	0	0	0	0	0	0	0
Waste	Waste_storage	Low Density PolyEthylene Box	49.1803	1.36612	0	0	0	0	1	0	0	0	0	0	0	0	0	0
Waste	Waste_collection_ISS	Commode/Urinal	58.4	0.3	0	0	82.1918	0	1	0	0	0	0	0	0	0	0	0
Waste	Waste_collection_ISS	Fan	0	0	102	102	0	1	0	0	0	0	0	0	0	0	0	0
Waste	Waste_collection_ISS	Urine Separator	0	0	125	125	0	0.9	0	0.09	0.01	0	0	0	0	0	0	0
Waste	Waste_collection_ISS	Urine Vent Heater	0	0	14	14	0	1	0	0	0	0	0	0	0	0	0	0
Waste	Waste_collection_ISS	Fecal Bags	54.5455	0.609	0	0	0	0	0	0	1	0	0	0	0	0	0	0
Waste	Waste_collection_ISS	Wipes, Dry	18.1818	0.245806	0	0	0	0	0	0	1	0	0	0	0	0	0	0
Waste	Waste_collection_ISS	Wipes, Wet	28.4091	0.147484	0	0	0	0	0	0	0.6	0	0	0	0	0	0.4	0
Waste	Waste_collection_ISS	Wipes, Toilet Tissue	9.81818	0.119876	0	0	0	0	0	0	0	0	0	0	0	0	0	1
Waste	Waste_collection_ISS	Gloves	15.5455	0.0707921	0	0	0	0	1	0	0	0	0	0	0	0	0	0
Waste	Waste_collection_ISS	Fecal Bags Odor Lids	81.8182	0.765	0	0	0	0	1	0	0	0	0	0	0	0	0	0
Waste	Waste_collection_ISS	Fecal collection Canisters	97.4026	1.275	0	0	0	0	0.9	0	0.1	0	0	0	0	0	0	0
Waste	Waste_collection_ISS	Fecal collection Canisters lids	48.7013	0.199286	0	0	0	0	1	0	0	0	0	0	0	0	0	0
Waste	Waste_collection_ISS	Urine Prefilters	85.2273	0.4635	0	0	0	1	0	0	0	0	0	0	0	0	0	0
Waste	Waste_collection_ISS	Urine Filters	12.1753	0.0983571	0	0	0	0	0	0	1	0	0	0	0	0	0	0
Waste	Waste_collection_ISS	Urine Funnels	1.16364	0.006552	0	0	0	1	0	0	0	0	0	0	0	0	0	0
Waste	Waste_collection_ISS	Flush Water Transfer Bags	15.5844	0.2175	0	0	0	0	0.3	0	0.7	0	0	0	0	0	0	0
Waste	TCCS_ISS_2	Activated charcoal bed	25.7447	0.0531594	0	0	0	0	0.5	0	0	0	0	0	0	0	0	0.5
Waste	TCCS_ISS_2	Blower Assembly	4.97143	0.00977143	60.7857	60.7857	0	0.8	0	0.2	0	0	0	0	0	0	0	0
Waste	TCCS_ISS_2	Flow Meter Assembly	2.2	0.0006	23	23	0	0.7	0.1	0.1	0	0.1	0	0	0	0	0	0
Waste	TCCS_ISS_2	Catalytic Oxidizer Assembly	16.9143	0.0370286	184.381	184.381	0	1	0	0	0	0	0	0	0	0	0	0
Waste	TCCS_ISS_2	LiOH Sorbent bed assembly	1.74661	0.00336542	0	0	0	0.07	0.03	0	0	0	0	0.9	0	0	0	0
Waste	TCCS_ISS_2	Electrical interface assembly	9	0.00974	15.2	15.2	0	0	0	1	0	0	0	0	0	0	0	0
Water	VCD_ISS	MLS Filter ORU	10.9676	0.0153878	0	0	0	0.5	0	0.5	0	0	0	0	0	0	0	0
Water	VCD_ISS	Particulate Filter ORU	56.8269	0.144504	0	0	0	0.9	0	0	0	0	0	0	0	0	0	0.1
Water	VCD_ISS	Multifiltration Bed #1 & #2 ORUs	464.08	0.604362	0	0	0	0.07	0.03	0	0	0	0	0	0	0	0.9	0
Water	VCD_ISS	Sensor ORU	3.64	0.0093	2.13	2.13	0	0	0.6	0.2	0	0.2	0	0	0	0	0	0
Water	VCD_ISS	Piping	0.738641	0.00100529	0	0	0	1	0	0	0	0	0	0	0	0	0	0
Water	VCD_ISS	Pump/MLS ORU	18.3951	0.057701	19.5382	19.5382	0	0.5	0	0.5	0	0	0	0	0	0	0	0
Water	VCD_ISS	Catalytic Reactor & Preheeater ORU	0	0	107.471	107.471	0	1	0	0	0	0	0	0	0	0	0	0
Water	VCD_ISS	Oxygen Filter	0	0	0	0	0	0.5	0.5	0	0	0	0	0	0	0	0	0
Water	VCD_ISS	Microbial Check Valve	5.13472	0.00894791	0	0	0	0.99	0	0	0	0	0	0	0	0	0	0.01
Water	Potable_water_tank	Gas Separator ORU	26.1951	0.0571021	50.5295	50.5295	0	0.9	0.1	0	0	0	0	0	0	0	0	0.001
Water	Potable_water_tank	Hygiene H2O Tank	58.2667	0.108547	4.7099	4.7099	0	0	1	0	0	0	0	0	0	0	0	0
Water	WRS	Product H2O Tank	32.7904	0.116467	5.24364	5.24364	0	0	1	0	0	0	0	0	0	0	0	0
Water	WRS	Process Controller	36.91	0.0838	156.18	156.18	0	0.3	0.001	0.7	0	0	0	0	0	0	0	0
Water	WRS	Reactor Health Sensor	8.64	0.0422	4.72	4.72	0	0.1	0.2	0.6	0	0	0	0.1	0	0	0	0
Water	WRS	H2O Delivery System	26.1086	0.0648222	1.92579	1.92579	0	0.9	0	0	0	0	0.1	0	0	0	0	0
Water	WRS	Ion Exchange Bed	7.70283	0.0104835	0	0	0	0.07	0.03	0	0	0	0	0	0	0	0.9	0	https://ntrs.nasa.gov/api/citations/20140002688/downloads/20140002688.pdf
Water	WRS	Pressure Control & Pump (PCPA)	33.6413	0.0548189	9.77434	9.77434	0	0.7	0.2	0.1	0	0	0	0	0	0	0	0
Water	WRS	Fluid Control & Pump (FCPA)	34.2562	0.0543689	14.1775	14.1775	0	0.7	0.2	0.1	0	0	0	0	0	0	0	0
Water	WRS	Recycle Filter Tank (RFTA)	14.3159	0.0764165	0	0	0	0	1	0	0	0	0	0	0	0	0	0
Water	WRS	Wastewater Storage Tank Assembly (WSTA)	35.891	0.0308216	0.139967	0.139967	0	1	0	0	0	0	0	0	0	0	0	0
Water	WRS	Distillation Assembly (DA)	56.7912	0.113387	135.464	135.464	0	0.6	0	0.1	0	0.3	0	0	0	0	0	0
Water	WRS	Separator Plumbing Assembly (SPA)	12.2386	0.0186729	0	0	0	0.99	0.01	0	0	0	0	0	0	0	0	0
Water	WRS	Power Module (Included in FCA)	0	0	0	0	0	0	0	0	0	0	0	0	0	0	0	0
Water	WRS	Firmware Controller Assembly (Data module, power module)	24.09	0.0286	150.09	150.09	0	0.8	0	0.2	0	0	0	0	0	0	0	0
Water	WRS	Piping	9.35671	0.0174243	0	0	0	1	0	0	0	0	0	0	0	0	0	0
Water	Volatile_removal_assembly	Catalytic Reactor & Preheeater ORU	0	0	90.481	90.481	0	1	0	0	0	0	0	0	0	0	0	0
Water	Volatile_removal_assembly	Gas Separator ORU	24.5428	0.0535004	42.5412	42.5412	0	0.9	0.1	0	0	0	0	0	0	0	0	0.001
Water	Volatile_removal_assembly	Oxygen Filter	0	0	0	0	0	0.5	0.5	0	0	0	0	0	0	0	0	0
Water	Volatile_removal_assembly	Piping	1.26268	0.00267502	0	0	0	1	0	0	0	0	0	0	0	0	0	0
Water	WRS	Product H2O Tank	137.092	0.486932	18.0688	18.0688	0	0	1	0	0	0	0	0	0	0	0	0
Water	WRS	H2O Stored	370.553	0	0	0	0	0	0	0	0	0	0	0	0	0	1	0
Food	Stored_food	Packaging	2707.39	0	0	0	0	0.01	0.99	0	0	0	0	0	0	0	0	0	https://www.eriesd.org/cms/lib/PA01001942/Centricity/Domain/1041/Space%20food%20packagingbrochure.pdf
Food	Food_storage	Storage	663.883	9.26348	0	0	0	0.25	0.25	0	0	0	0	0	0	0.5	0	0
Food	Food_processing	Rehydration Unit and Conduction Oven	36.3	0.094	10	10	0	0.7	0.05	0.25	0	0	0	0	0	0	0	0
Thermal	CCAA	Inlet ORU	0	0	299.078	299.078	0	1	0	0	0	0	0	0	0	0	0	0
Thermal	CCAA	Condensing heat exchanger	34.8955	0.0692142	0	0	0	1	0	0	0	0	0	0	0	0	0	0
Thermal	CCAA	Water separator	5.30407	0.0365937	3.35284	3.35284	0	0.99	0	0	0	0	0	0	0	0	0	0.01
Thermal	CCAA	Temp. Control & Check Valve	3.88821	0.026388	0.059869	0.059869	0	0.8	0.15	0	0.05	0	0	0	0	0	0	0
Thermal	CCAA	Electrical Interface Box (EIB)	4.1	0.0113	8	8	0	0.9	0	0.1	0	0	0	0	0	0	0	0
Thermal	CCAA	Temp. Sensor	0.24	0.0006	0.01	0.01	0	0	0	0.6	0	0.4	0	0	0	0	0	0
Thermal	CCAA	Liquid Sensor	0.47	0.0006	0.01	0.01	0	0	0.5	0.5	0	0	0	0	0	0	0	0
Thermal	CCAA	Fan Delta P Sensor	0.4	0.00024	0.2	0.2	0	0.9	0	0.1	0	0	0	0	0	0	0	0
Thermal	CCAA	Pressure Sensor	0.3	6e-05	0.2	0.2	0	0.1	0.25	0.65	0	0	0	0	0	0	0	0
Thermal	AMC	HEPA Filter Element	49.22	0.1886	0	0	2.73973	0.7	0	0	0	0.3	0	0	0	0	0	0
Thermal	AMC	Catalytic Filter element	54	0.082	0	0	0	0	0.7	0	0.3	0	0	0	0	0	0	0
Thermal	AC	IMV Fan	4.77	0.0093	55	55	0	0.9	0.05	0	0.05	0	0	0	0	0	0	0
Thermal	AC	IMV Valve	5.1	0.0099	6	6	0	1	0	0	0	0	0	0	0	0	0	0
Thermal	AAA	Avionics Air Assembly	12.4	0.034	175	175	0	0.8	0.1	0	0.1	0	0	0	0	0	0	0
Thermal	ITCS	ITCS	212.492	0.356307	2595.44	2595.44	0	0.9	0	0.1	0	0	0	0	0	0	0	0	https://www.nasa.gov/pdf/473486main_iss_atcs_overview.pdf

## Sheet: case 3 30 trip 180 days to moon
System	Subsystem	Item	Mass, kg	Volume, m3	Power, watts	Cooling, watts	Crew time, MMH/yr	fraction Structural Metal	fraction Plastic	fraction Electronics	fraction Fabric	fraction Glass	fraction Rubber	fraction Ceramics	fraction Gas	fraction biomass	fraction Water	fraction Other
Air	APC	Vent/Relief Valve	5.4	0.0141	0	0	0	1	0	0	0	0	0	0	0	0	0	0
Air	APC	Pressure control panel	11.2	0.034	18	18	0	0.2	0.1	0.7	0	0	0	0	0	0	0	0
Air	APC	Manual Pressure Equalization Valve	9.6	0.0112	0	0	0	1	0	0	0	0	0	0	0	0	0	0
Air	APC	Positive Pressure Relief Valve	1.8	0.0034	0	0	0	1	0	0	0	0	0	0	0	0	0	0
Air	APC	Negative Pressure Relief Valve	3	0.0093	0	0	0	1	0	0	0	0	0	0	0	0	0	0
Air	APC	Nitrogen Interface Assembly	7.5	0.0122	5.5	5.5	0	1	0	0	0	0	0	0	0	0	0	0
Air	APC	Vacuum Access Jumper 5-ft	0.7	0.00043	0	0	0	0	0	1	0	0	0	0	0	0	0	0
Air	APC	Vacuum Access Jumper 35-ft	3.2	0.003	0	0	0	0	0	1	0	0	0	0	0	0	0	0
Air	ACMA	Verification Gas Assembly	5.4	0.0136	0.1	0.1	0	0.5	0	0	0	0	0	0	0.5	0	0	0
Air	ACMA	Mass Spectrometer	13.9	0.0238	31.8	31.8	0	0.5	0	0.5	0	0	0	0	0	0	0	0
Air	ACMA	Sample Pump	3.4	0.0045	4	4	0	1	0	0	0	0	0	0	0	0	0	0
Air	ACMA	Sample Distributor	2.1	0.0045	0.1	0.1	0	0.95	0	0	0.05	0	0	0	0	0	0	0
Air	ACMA	Data & Control	8	0.0141	34.9	34.9	0	0.5	0	0.5	0	0	0	0	0	0	0	0
Air	ACMA	Low Volt. Power supply	5.7	0.0054	30.8	30.8	0	0.7	0	0	0	0	0.1	0.1	0	0	0	0.1
Air	ACMA	Chassis	15.8	0.0238	0	0	0	1	0	0	0	0	0	0	0	0	0	0
Air	ACMA	Inlet Valve Assembly	0	0	0	0	0	0.9	0	0	0.01	0	0	0	0	0	0.09	0
Air	ACMA	EMI Filter	0	0	1.8	1.8	0	0.98	0.02	0	0	0	0	0	0	0	0	0
Air	SDS	3-way solenoid valves	31.5	0.0345	0	0	0	1	0	0	0	0	0	0	0	0	0	0
Air	SDS	Manual valves	2.53	0.0066	0	0	0	1	0	0	0	0	0	0	0	0	0	0
Air	SDS	Sample probes	1.08	0.00024	0	0	0	1	0	0	0	0	0	0	0	0	0	0
Air	CO2_removal_4BMS	Air Selector Valve	12.7506	0.00833695	0.69558	0.69558	0.986301	0.9	0	0	0	0	0	0	0.1	0	0	0
Air	CO2_removal_4BMS	Desiccant Bed	24.0671	0.246235	0	0	0.236712	0.4	0	0	0	0	0	0.6	0	0	0	0
Air	CO2_removal_4BMS	Adsorbent Bed	32.8314	0	573.158	573.158	0	0.5	0	0	0.2	0	0	0.3	0	0	0	0
Air	CO2_removal_4BMS	Air Check Valve	0.16347	0	0	0	0	1	0	0	0	0	0	0	0	0	0	0
Air	CO2_removal_4BMS	Heater Controller	6.6	0.0016	38	38	0.00986301	0.8	0	0.2	0	0	0	0	0	0	0	0
Air	CO2_removal_4BMS	Air Blower	0.817348	0.0204337	40.3437	40.3437	0.0641096	1	0	0	0	0	0	0	0	0	0	0
Air	CO2_removal_4BMS	Precooler	2.20684	0	0	0	0	1	0	0	0	0	0	0	0	0	0	0
Air	CO2_removal_4BMS	Blower/precooler Motor Controller	1.3	0	5	5	0	0.6	0	0.4	0	0	0	0	0	0	0	0
Air	CO2_removal_4BMS	CO2 Pump	6.70226	0.00367807	13.216	13.216	0.0394521	0.99	0	0	0	0	0	0	0	0	0	0.01
Air	CO2_removal_4BMS	CO2 Pump Motor Controller	1.3	0.0057	2	2	0.00493151	0.3	0	0.7	0	0	0	0	0	0	0	0
Air	CO2_removal_4BMS	Temperature Sensor	0.399	0	1	1	0	0	0	0.6	0	0.4	0	0	0	0	0	0
Air	CO2_removal_4BMS	Differential Pressure Sensor	0.2	0	1	1	0	0.1	0.25	0.65	0	0	0	0	0	0	0	0
Air	CO2_removal_4BMS	Absolute Pressure Sensor	0.2	0	1	1	0	0.75	0	0	0	0	0	0.25	0	0	0	0
Air	CO2_removal_4BMS	Electrical Harness	4.5	0	0	0	0	0.9	0.05	0	0.05	0	0	0	0	0	0	0
Air	CO2_removal_4BMS	Plumbing	4.82235	0	0	0	0	1	0	0	0	0	0	0	0	0	0	0
Air	CO2_removal_4BMS	Support Structure	29.5063	0	0	0	0	1	0	0	0	0	0	0	0	0	0	0
Air	CO2_removal_4BMS	Fluid Disconnects	1.96164	0	0	0	0	1	0	0	0	0	0	0	0	0	0	0
Air	CO2_removal_4BMS	Electronics coldplate	2.69725	0	0	0	0	1	0	0	0	0	0	0	0	0	0	0
Air	CO2_removal_4BMS	Electronics Interface Plate	1.6	0	0	0	0	1	0	0	0	0	0	0	0	0	0	0
Air	N2_storage	MD Shield Instl	0	0	0	0	0	1	0	0	0	0	0	0	0	0	0	0
Air	N2_storage	Multilayer Insulation Assembly-T #1	0	0	0	0	0	1	0	0	0	0	0	0	0	0	0	0
Air	N2_storage	Multilayer Insulation Assembly-T #2	0	0	0	0	0	1	0	0	0	0	0	0	0	0	0	0
Air	N2_storage	Primary Structure Assembly -HPG ORU	0	0	0	0	0	0.5	0	0	0	0	0	0	0.5	0	0	0
Air	N2_storage	Tank ORU Assembly	0	0	0	0	0	1	0	0	0	0	0	0	0	0	0	0
Air	N2_storage	Utilities Installation - O2/N2 Tank	0	0	0	0	0	0.5	0	0	0	0	0	0	0.5	0	0	0
Air	N2_storage	N2 Bare Tank	80.4348	0	0	0	0	0.9	0	0	0	0	0.05	0	0.05	0	0	0
Air	N2_storage	HPGA Fluid	81.8289	0	0	0	0	0	0	0	0	0	0	0	0	0	1	0
Air	N2_storage	Handhold, top mounted	0.216026	0	0	0	0	0	1	0	0	0	0	0	0	0	0	0
Air	N2_storage	Handrail 21.941 in custom	0.378046	0	0	0	0	0	1	0	0	0	0	0	0	0	0	0
Air	N2_storage	Handrail, top mounted	0.396048	0	0	0	0	0	1	0	0	0	0	0	0	0	0	0
Air	N2_storage	Grapple fixture, flt releasable	11.1253	0	0	0	0	0.5	0	0.5	0	0	0	0	0	0	0	0
Air	N2_storage	Accessories	4.0258	0	0	0	0	0	0	0	0	0	0	0	0	0	0	0
Air	O2_storage	MD Shield Instl	0	0	0	0	0	1	0	0	0	0	0	0	0	0	0	0
Air	O2_storage	Multilayer Insulation Assembly-T #1	0	0	0	0	0	1	0	0	0	0	0	0	0	0	0	0
Air	O2_storage	Multilayer Insulation Assembly-T #2	0	0	0	0	0	1	0	0	0	0	0	0	0	0	0	0
Air	O2_storage	Primary Structure Assembly -HPG ORU	0	0	0	0	0	0.5	0	0	0	0	0	0	0.5	0	0	0
Air	O2_storage	Tank ORU Assembly	0	0	0	0	0	1	0	0	0	0	0	0	0	0	0	0
Air	O2_storage	Utilities Installation - O2/N2 Tank	0	0	0	0	0	0.5	0	0	0	0	0	0	0.5	0	0	0
Air	O2_storage	O2 Bare Tank	53.5334	0	0	0	0	0.95	0	0	0	0	0	0	0.05	0	0	0
Air	O2_storage	HPGA Fluid	44.465	0	0	0	0	0	0	0	0	0	0	0	0	0	1	0
Air	O2_storage	Handhold, top mounted	0.117387	0	0	0	0	0	1	0	0	0	0	0	0	0	0	0
Air	O2_storage	Handrail 21.941 in custom	0.205426	0	0	0	0	0	1	0	0	0	0	0	0	0	0	0
Air	O2_storage	Handrail, top mounted	0.215209	0	0	0	0	0	1	0	0	0	0	0	0	0	0	0
Air	O2_storage	Grapple fixture, flt releasable	6.04541	0	0	0	0	0.5	0	0.5	0	0	0	0	0	0	0	0
Air	O2_storage	Accessories	2.67937	0	0	0	0	0	0	0	0	0	0	0	0	0	0	0
Air	CO2_reduction_sabatier	Condensing Heat Exchanger	1.49195	0	0	0	0	0.9	0	0.1	0	0	0	0	0	0	0	0
Air	CO2_reduction_sabatier	AAA heat exchanger	2.50434	0	0	0	0	1	0	0	0	0	0	0	0	0	0	0
Air	CO2_reduction_sabatier	ITCS Coolant Water Inlet QD	0.479555	0	0	0	0	1	0	0	0	0	0	0	0	0	0	0
Air	CO2_reduction_sabatier	ITCS Coolant Water Outlet QD	0.36233	0	0	0	0	1	0	0	0	0	0	0	0	0	0	0
Air	CO2_reduction_sabatier	Heat Exchanger Inlet Temp	0.363636	0	0	0	0	1	0	0	0	0	0	0	0	0	0	0
Air	CO2_reduction_sabatier	Heat Exchanger Outlet Temp	0.363636	0	0	0	0	1	0	0	0	0	0	0	0	0	0	0
Air	CO2_reduction_sabatier	Manifold, CO2	4.79555	0	0	0	0	0.95	0.05	0	0	0	0	0	0	0	0	0
Air	CO2_reduction_sabatier	CO2 Inlet Check Valve	0.106568	0	0	0	0	0.9	0.1	0	0	0	0	0	0	0	0	0
Air	CO2_reduction_sabatier	CO2 Inlet Filter	0.0564007	0	0	0	0	1	0	0	0	0	0	0	0	0	0	0
Air	CO2_reduction_sabatier	Pressure sensor, CO2 Inlet	0.409091	0	0	0	0	0	0	0.6	0	0.4	0	0	0	0	0	0
Air	CO2_reduction_sabatier	CO2 Inlet QD	0.479555	0	0	0	0	1	0	0	0	0	0	0	0	0	0	0
Air	CO2_reduction_sabatier	CO2 Inlet Regulator	0.932467	0	0	0	0	0.9	0.05	0	0	0.05	0	0	0	0	0	0
Air	CO2_reduction_sabatier	CO2 Inlet NC Solenoid	0.479555	0	0	0	0	1	0	0	0	0	0	0	0	0	0	0
Air	CO2_reduction_sabatier	CO2 Inlet Flow Control	2.18464	0	0	0	0	0.85	0.05	0	0	0.1	0	0	0	0	0	0
Air	CO2_reduction_sabatier	CO2 Flow Control Orifice	0.0532838	0	0	0	0	1	0	0	0	0	0	0	0	0	0	0
Air	CO2_reduction_sabatier	Delta P Sensor, Flow Sensor CO2	0.909091	0	0	0	0	0	0	0.6	0	0.4	0	0	0	0	0	0
Air	CO2_reduction_sabatier	CO2 Flow Meter Orifice	0.0266419	0	0	0	0	1	0	0	0	0	0	0	0	0	0	0
Air	CO2_reduction_sabatier	Manifold, Hydrogen	4.4492	0	0	0	0	0.95	0.05	0	0	0	0	0	0	0	0	0
Air	CO2_reduction_sabatier	Water Outlet Quick Disconnect	0.479555	0	0	0	0	1	0	0	0	0	0	0	0	0	0	0
Air	CO2_reduction_sabatier	Hydrogen Inlet Check Valve	0.106568	0	0	0	0	0.9	0.1	0	0	0	0	0	0	0	0	0
Air	CO2_reduction_sabatier	Hydrogen Inlet Filter	0.0564007	0	0	0	0	1	0	0	0	0	0	0	0	0	0	0
Air	CO2_reduction_sabatier	H2O Outlet Pressure Sensor	0.818182	0	0	0	0	0	0	0.6	0	0.4	0	0	0	0	0	0
Air	CO2_reduction_sabatier	Hydrogen Inlet Quick Disconnect	0.479555	0	0	0	0	1	0	0	0	0	0	0	0	0	0	0
Air	CO2_reduction_sabatier	Hydrogen Inlet NC Solenoid	0.959109	0	0	0	0	1	0	0	0	0	0	0	0	0	0	0
Air	CO2_reduction_sabatier	Delta P Sensor, Flow Sensor H2	0.909091	0	0	0	0	0	0	0.6	0	0.4	0	0	0	0	0	0
Air	CO2_reduction_sabatier	H2 Flow Meter Orifice	0.0266419	0	0	0	0	1	0	0	0	0	0	0	0	0	0	0
Air	CO2_reduction_sabatier	Manifold, Vent	5.14189	0	0	0	0	0.95	0.05	0	0	0	0	0	0	0	0	0
Air	CO2_reduction_sabatier	Liquid Sensor	1.09091	0	0	0	0	0	0.5	0.5	0	0	0	0	0	0	0	0
Air	CO2_reduction_sabatier	Vent Pressure Sensor	0.818182	0	0	0	0	0	0	0.6	0	0.4	0	0	0	0	0	0
Air	CO2_reduction_sabatier	Vent Outlet Quick Disconnect	0.479555	0	0	0	0	1	0	0	0	0	0	0	0	0	0	0
Air	CO2_reduction_sabatier	Vent Regulator	0.932467	0	0	0	0	0.9	0.05	0	0	0.05	0	0	0	0	0	0
Air	CO2_reduction_sabatier	Vent Relief/Check #1	0.159852	0	0	0	0	1	0	0	0	0	0	0	0	0	0	0
Air	CO2_reduction_sabatier	Vent Relief/Check #2	0.159852	0	0	0	0	1	0	0	0	0	0	0	0	0	0	0
Air	CO2_reduction_sabatier	Vent Outlet NO Solenoid	0.959109	0	0	0	0	1	0	0	0	0	0	0	0	0	0	0
Air	CO2_reduction_sabatier	Water Pressure Sensor	0.818182	0	0	0	0	0	0	0.6	0	0.4	0	0	0	0	0	0
Air	CO2_reduction_sabatier	Water Relief	0.159852	0	0	0	0	1	0	0	0	0	0	0	0	0	0	0
Air	CO2_reduction_sabatier	Water Outlet NC Solenoid	0.479555	0	0	0	0	1	0	0	0	0	0	0	0	0	0	0
Air	CO2_reduction_sabatier	Rotary Water Separator Assembly	4.10286	0	22.9286	22.9286	0	1	0	0	0	0	0	0	0	0	0	0
Air	CO2_reduction_sabatier	Sabatier Reactor Assembly	2.55762	0	3.27551	3.27551	0	0.9	0	0.1	0	0	0	0	0	0	0	0
Air	CO2_reduction_sabatier	Structure (A/R)	9.29803	0	0	0	0	1	0	0	0	0	0	0	0	0	0	0
Air	CO2_reduction_sabatier	Miscellaneous Hardware (Clampts, bolts, etc.) (A/R)	1.77273	0	0	0	0	1	0	0	0	0	0	0	0	0	0	0
Air	CO2_reduction_sabatier	Air Cooling NC Solenoid	0.639406	0	0	0	0	1	0	0	0	0	0	0	0	0	0	0
Air	CO2_reduction_sabatier	Air Inlet Filter	0.112801	0	0	0	0	1	0	0	0	0	0	0	0	0	0	0
Air	CO2_reduction_sabatier	Air Sabatier Orifice	0.0532838	0	0	0	0	1	0	0	0	0	0	0	0	0	0	0
Air	CO2_reduction_sabatier	Heat Exchanger Inlet Duct	0.106568	0	0	0	0	1	0	0	0	0	0	0	0	0	0	0
Air	CO2_reduction_sabatier	Heat Exchanger Outlet Duct	0.106568	0	0	0	0	1	0	0	0	0	0	0	0	0	0	0
Air	CO2_reduction_sabatier	Reactor Inlet Duct	0.213135	0	0	0	0	1	0	0	0	0	0	0	0	0	0	0
Air	CO2_reduction_sabatier	Reactor Outlet Duct	0.106568	0	0	0	0	1	0	0	0	0	0	0	0	0	0	0
Air	CO2_reduction_sabatier	Tubing (A/R)	0.69269	0	0	0	0	1	0	0	0	0	0	0	0	0	0	0
Air	CO2_reduction_sabatier	Harnesses	11.4545	0	0	0	0	0.9	0.05	0	0.05	0	0	0	0	0	0	0
Air	CO2_reduction_sabatier	Valves & Sensors' total power	0	0	7.75509	7.75509	0	0	0	1	0	0	0	0	0	0	0	0
Air	CO2_reduction_sabatier	Mechanical Compressor ORU	19.1822	0	45.8571	45.8571	0	0.9	0.1	0	0	0	0	0	0	0	0	0.001
Air	CO2_reduction_sabatier	Compressor Manifold Assembly	4.68898	0	0	0	0	0.95	0.05	0	0	0	0	0	0	0	0	0
Air	CO2_reduction_sabatier	Controller Assembly	28.5909	0	55	55	0	0	0.2	0.8	0	0	0	0	0	0	0	0
Air	CO2_reduction_sabatier	CO2 Accumulator	10.1852	0.0120272	0	0	0	1	0	0	0	0	0	0	0	0	0	0
Air	OGS_ISS	Deionizing Bed ORU (Inlet)	8.19422	0.0100528	0	0	0	0.05	0.15	0	0	0	0	0	0	0	0	0.8
Air	OGS_ISS	Deionizing Bed ORU (Recirculating)	8.19422	0.0100528	0	0	0	0.05	0.15	0	0	0	0	0	0	0	0	0.8
Air	OGS_ISS	Oxygen/Water ORU	37.0092	0.0251703	0	0	0	0.333333	0	0	0	0	0	0	0.333333	0	0.333333	0
Air	OGS_ISS	Pump ORU	6.56411	0.00607935	24.5316	24.5316	0	1	0	0	0	0	0	0	0	0	0	0
Air	OGS_ISS	Oxygen Phase Separator ORU	22.2007	0.00553658	0	0	0	1	0	0	0	0	0	0	0	0	0	0
Air	OGS_ISS	Hydrogen ORU	97.0654	0.0513965	32.368	32.368	0	1	0	0	0	0	0	0	0	0	0	0
Air	OGS_ISS	Hydrogen Sensor ORU	4.59	0.00344	0	0	0	1	0	0	0	0	0	0	0	0	0	0
Air	OGS_ISS	Process Controller	40.09	0.1359	148	148	0	0.3	0.001	0.7	0	0	0	0	0	0	0	0
Air	OGS_ISS	Power Supply Module (PSM)	14.1397	0.0221125	1124.36	562.182	0	0.7	0	0	0	0	0.1	0.1	0	0	0	0.1
Air	Fire_det_sup	Fire Detection Assembly	1.5	0.0028	1.48	1.48	0.029589	0.05	0.9	0.05	0	0	0	0	0	0	0	0
Air	Fire_det_sup	Portable Fire Extinguisher	6.8	0.0405	0	0	0	0.6	0	0	0	0	0	0	0.2	0	0	0.2
Air	ACO2R	Regenerator 1	45.3	0.17	397	397	0	0.98	0.01	0	0	0.01	0	0	0	0	0	0
Air	ACO2R	Metox Canisters	136	0.057	0	0	0	1	0	0	0	0	0	0	0	0	0	0
Air	TCCS_ISS	Activated charcoal bed	4.63405	0.00956869	0	0	0	0	0.5	0	0	0	0	0.5	0	0	0	0
Air	TCCS_ISS	Blower Assembly	2.48571	0.00488571	30.3929	30.3929	0	0.8	0	0.2	0	0	0	0	0	0	0	0
Air	TCCS_ISS	Flow Meter Assembly	1.1	0.0003	11.5	11.5	0	0.7	0.1	0.1	0	0.1	0	0	0	0	0	0
Air	TCCS_ISS	Catalytic Oxidizer Assembly	8.45714	0.0185143	92.1905	92.1905	0	1	0	0	0	0	0	0	0	0	0	0
Air	TCCS_ISS	LiOH Sorbent bed assembly	0.31439	0.000605775	0	0	0	0.07	0.03	0	0	0	0	0.9	0	0	0	0
Air	TCCS_ISS	Electrical interface assembly	4.5	0.00487	7.6	7.6	0	0	0	1	0	0	0	0	0	0	0	0
Waste	PMWC	Aluminum Compaction cylinder	9.41424	0.0234161	0	0	180	1	0	0	0	0	0	0	0	0	0	0
Waste	PMWC	Band-type heating unit	0	0	162.578	0	0	0.9	0	0	0	0	0	0.1	0	0	0	0
Waste	PMWC	Commercial Lightweight, oil-less, compressor/vacuum pump	0	0	3.22849	0	0	0.9	0	0.1	0	0	0	0	0	0	0	0
Waste	PMWC	Temperature sensor	0.224	0	0	0	0	0	0	0.6	0	0.4	0	0	0	0	0	0
Waste	PMWC	Pressure sensor	0.304	0	0.33	0	0	0.1	0.25	0.65	0	0	0	0	0	0	0	0
Waste	PMWC	Housing & Mounting Equipment	23.894	0.47788	0	0	0	1	0	0	0	0	0	0	0	0	0	0
Waste	PMWC	Condensing Heat Exchanger	2.86307	0.00568917	0	0	0	1	0	0	0	0	0	0	0	0	0	0
Waste	PMWC	Cooling system	0	0	145.142	145.142	0	1	0	0	0	0	0	0	0	0	0	0
Waste	Waste_storage	Low Density PolyEthylene Box	17.7049	0.491803	0	0	0	0	1	0	0	0	0	0	0	0	0	0
Waste	Waste_collection_ISS	Commode/Urinal	58.4	0.3	0	0	29.589	0	1	0	0	0	0	0	0	0	0	0
Waste	Waste_collection_ISS	Fan	0	0	102	102	0	1	0	0	0	0	0	0	0	0	0	0
Waste	Waste_collection_ISS	Urine Separator	0	0	125	125	0	0.9	0	0.09	0.01	0	0	0	0	0	0	0
Waste	Waste_collection_ISS	Urine Vent Heater	0	0	14	14	0	1	0	0	0	0	0	0	0	0	0	0
Waste	Waste_collection_ISS	Fecal Bags	19.6364	0.21924	0	0	0	0	0	0	1	0	0	0	0	0	0	0
Waste	Waste_collection_ISS	Wipes, Dry	6.54545	0.0884901	0	0	0	0	0	0	1	0	0	0	0	0	0	0
Waste	Waste_collection_ISS	Wipes, Wet	10.2273	0.0530941	0	0	0	0	0	0	0.6	0	0	0	0	0	0.4	0
Waste	Waste_collection_ISS	Wipes, Toilet Tissue	3.53455	0.0431555	0	0	0	0	0	0	0	0	0	0	0	0	0	1
Waste	Waste_collection_ISS	Gloves	5.59636	0.0254852	0	0	0	0	1	0	0	0	0	0	0	0	0	0
Waste	Waste_collection_ISS	Fecal Bags Odor Lids	29.4545	0.2754	0	0	0	0	1	0	0	0	0	0	0	0	0	0
Waste	Waste_collection_ISS	Fecal collection Canisters	35.0649	0.459	0	0	0	0	0.9	0	0.1	0	0	0	0	0	0	0
Waste	Waste_collection_ISS	Fecal collection Canisters lids	17.5325	0.0717429	0	0	0	0	1	0	0	0	0	0	0	0	0	0
Waste	Waste_collection_ISS	Urine Prefilters	30.6818	0.16686	0	0	0	1	0	0	0	0	0	0	0	0	0	0
Waste	Waste_collection_ISS	Urine Filters	4.38312	0.0354086	0	0	0	0	0	0	1	0	0	0	0	0	0	0
Waste	Waste_collection_ISS	Urine Funnels	1.16364	0.006552	0	0	0	1	0	0	0	0	0	0	0	0	0	0
Waste	Waste_collection_ISS	Flush Water Transfer Bags	5.61039	0.0783	0	0	0	0	0.3	0	0.7	0	0	0	0	0	0	0
Waste	TCCS_ISS_2	Activated charcoal bed	9.2681	0.0191374	0	0	0	0	0.5	0	0	0	0	0	0	0	0	0.5
Waste	TCCS_ISS_2	Blower Assembly	4.97143	0.00977143	60.7857	60.7857	0	0.8	0	0.2	0	0	0	0	0	0	0	0
Waste	TCCS_ISS_2	Flow Meter Assembly	2.2	0.0006	23	23	0	0.7	0.1	0.1	0	0.1	0	0	0	0	0	0
Waste	TCCS_ISS_2	Catalytic Oxidizer Assembly	16.9143	0.0370286	184.381	184.381	0	1	0	0	0	0	0	0	0	0	0	0
Waste	TCCS_ISS_2	LiOH Sorbent bed assembly	0.628779	0.00121155	0	0	0	0.07	0.03	0	0	0	0	0.9	0	0	0	0
Waste	TCCS_ISS_2	Electrical interface assembly	9	0.00974	15.2	15.2	0	0	0	1	0	0	0	0	0	0	0	0
Water	WRS	MLS Filter ORU	3.96407	0.00556169	0	0	0	0.5	0	0.5	0	0	0	0	0	0	0	0
Water	WRS	Particulate Filter ORU	20.5393	0.0522289	0	0	0	0.9	0	0	0	0	0	0	0	0	0	0.1
Water	WRS	Multifiltration Bed #1 & #2 ORUs	167.735	0.218438	0	0	0	0.07	0.03	0	0	0	0	0	0	0	0.9	0
Water	WRS	Sensor ORU	3.64	0.0093	2.13	2.13	0	0	0.6	0.2	0	0.2	0	0	0	0	0	0
Water	WRS	Piping	0.740627	0.00100799	0	0	0	1	0	0	0	0	0	0	0	0	0	0
Water	WRS	Pump/MLS ORU	18.4244	0.0577929	19.6162	19.6162	0	0.5	0	0.5	0	0	0	0	0	0	0	0
Water	WRS	Catalytic Reactor & Preheeater ORU	0	0	107.9	107.9	0	1	0	0	0	0	0	0	0	0	0	0
Water	WRS	Oxygen Filter	0	0	0	0	0	0.5	0.5	0	0	0	0	0	0	0	0	0
Water	WRS	Microbial Check Valve	5.15521	0.0089836	0	0	0	0.99	0	0	0	0	0	0	0	0	0	0.01
Water	WRS	Gas Separator ORU	26.2368	0.057193	50.731	50.731	0	0.9	0.1	0	0	0	0	0	0	0	0	0.001
Water	WRS	Hygiene H2O Tank	58.3595	0.10872	4.71566	4.71566	0	0	1	0	0	0	0	0	0	0	0	0
Water	WRS	Product H2O Tank	32.8426	0.116652	5.25006	5.25006	0	0	1	0	0	0	0	0	0	0	0	0
Water	WRS	Process Controller	36.91	0.0838	156.18	156.18	0	0.3	0.001	0.7	0	0	0	0	0	0	0	0
Water	WRS	Reactor Health Sensor	8.64	0.0422	4.72	4.72	0	0.1	0.2	0.6	0	0	0	0.1	0	0	0	0
Water	WRS	H2O Delivery System	26.1501	0.0649253	1.92815	1.92815	0	0.9	0	0	0	0	0.1	0	0	0	0	0
Water	WRS	Ion Exchange Bed	2.78408	0.00378912	0	0	0	0.07	0.03	0	0	0	0	0	0	0	0.9	0
Water	VCD_ISS	Pressure Control & Pump (PCPA)	33.7288	0.0549615	9.82884	9.82884	0	0.7	0.2	0.1	0	0	0	0	0	0	0	0
Water	VCD_ISS	Fluid Control & Pump (FCPA)	34.3453	0.0545104	14.2565	14.2565	0	0.7	0.2	0.1	0	0	0	0	0	0	0	0
Water	VCD_ISS	Recycle Filter Tank (RFTA)	14.3532	0.0766153	0	0	0	0	1	0	0	0	0	0	0	0	0	0
Water	VCD_ISS	Wastewater Storage Tank Assembly (WSTA)	35.9844	0.0309018	0.140747	0.140747	0	1	0	0	0	0	0	0	0	0	0	0
Water	VCD_ISS	Distillation Assembly (DA)	56.9389	0.113682	136.22	136.22	0	0.6	0	0.1	0	0.3	0	0	0	0	0	0
Water	VCD_ISS	Separator Plumbing Assembly (SPA)	12.2705	0.0187215	0	0	0	0.99	0.01	0	0	0	0	0	0	0	0	0
Water	VCD_ISS	Power Module (Included in FCA)	0	0	0	0	0	0	0	0	0	0	0	0	0	0	0	0
Water	VCD_ISS	Firmware Controller Assembly (Data module, power module)	24.09	0.0286	150.09	150.09	0	0.8	0	0.2	0	0	0	0	0	0	0	0
Water	VCD_ISS	Piping	9.38105	0.0174696	0	0	0	1	0	0	0	0	0	0	0	0	0	0
Water	Volatile_removal_assembly	Catalytic Reactor & Preheeater ORU	0	0	90.481	90.481	0	1	0	0	0	0	0	0	0	0	0	0
Water	Volatile_removal_assembly	Gas Separator ORU	24.5428	0.0535004	42.5412	42.5412	0	0.9	0.1	0	0	0	0	0	0	0	0	0.001
Water	Volatile_removal_assembly	Oxygen Filter	0	0	0	0	0	0.5	0.5	0	0	0	0	0	0	0	0	0
Water	Volatile_removal_assembly	Piping	1.26268	0.00267502	0	0	0	1	0	0	0	0	0	0	0	0	0	0
Water	Potable_water_tank	Product H2O Tank	84.825	0.301286	11.6419	11.6419	0	0	1	0	0	0	0	0	0	0	0	0
Water	Potable_water_tank	H2O Stored	205.558	0	0	0	0	0	0	0	0	0	0	0	0	0	1	0
Food	Stored_food	Packaging	990	0	0	0	0	0.01	0.99	0	0	0	0	0	0	0	0	0
Food	Food_storage	Storage	242.76	3.38734	0	0	0	0.25	0.25	0	0	0	0	0	0	0.5	0	0
Food	Food_processing	Rehydration Unit and Conduction Oven	36.3	0.094	10	10	0	0.7	0.05	0.25	0	0	0	0	0	0	0	0
Thermal	CCAA	Inlet ORU	0	0	299.235	299.235	0	1	0	0	0	0	0	0	0	0	0	0
Thermal	CCAA	Condensing heat exchanger	34.9134	0.0692497	0	0	0	1	0	0	0	0	0	0	0	0	0	0
Thermal	CCAA	Water separator	5.30789	0.03662	3.37633	3.37633	0	0.99	0	0	0	0	0	0	0	0	0	0.01
Thermal	CCAA	Temp. Control & Check Valve	3.89052	0.0264037	0.0598947	0.0598947	0	0.8	0.15	0	0.05	0	0	0	0	0	0	0
Thermal	CCAA	Electrical Interface Box (EIB)	4.1	0.0113	8	8	0	0.9	0	0.1	0	0	0	0	0	0	0	0
Thermal	CCAA	Temp. Sensor	0.24	0.0006	0.01	0.01	0	0	0	0.6	0	0.4	0	0	0	0	0	0
Thermal	CCAA	Liquid Sensor	0.47	0.0006	0.01	0.01	0	0	0.5	0.5	0	0	0	0	0	0	0	0
Thermal	CCAA	Fan Delta P Sensor	0.4	0.00024	0.2	0.2	0	0.9	0	0.1	0	0	0	0	0	0	0	0
Thermal	CCAA	Pressure Sensor	0.3	6e-05	0.2	0.2	0	0.1	0.25	0.65	0	0	0	0	0	0	0	0
Thermal	AMC	HEPA Filter Element	49.22	0.1886	0	0	0.986301	0.7	0	0	0	0.3	0	0	0	0	0	0
Thermal	AMC	Catalytic Filter element	54	0.082	0	0	0	0	0.7	0	0.3	0	0	0	0	0	0	0
Thermal	AC	IMV Fan	4.77	0.0093	55	55	0	0.9	0.05	0	0.05	0	0	0	0	0	0	0
Thermal	AC	IMV Valve	5.1	0.0099	6	6	0	1	0	0	0	0	0	0	0	0	0	0
Thermal	AAA	Avionics Air Assembly	12.4	0.034	175	175	0	0.8	0.1	0	0.1	0	0	0	0	0	0	0
Thermal	ITCS	ITCS	211.83	0.36	2585.1	2585.1	0	0.9	0	0.1	0	0	0	0	0	0	0	0

## Sheet: case 4 10 trip 540 days to mars
System	Subsystem	Item	Mass, kg	Volume, m3	Power, watts	Cooling, watts	Crew time, MMH/yr	fraction Structural Metal	fraction Plastic	fraction Electronics	fraction Fabric	fraction Glass	fraction Rubber	fraction Ceramics	fraction Gas	fraction biomass	fraction Water	fraction Other
Air	APC	Vent/Relief Valve	5.4	0.0141	0	0	0	1	0	0	0	0	0	0	0	0	0	0
Air	APC	Pressure control panel	11.2	0.034	18	18	0	0.2	0.1	0.7	0	0	0	0	0	0	0	0
Air	APC	Manual Pressure Equalization Valve	9.6	0.0112	0	0	0	1	0	0	0	0	0	0	0	0	0	0
Air	APC	Positive Pressure Relief Valve	1.8	0.0034	0	0	0	1	0	0	0	0	0	0	0	0	0	0
Air	APC	Negative Pressure Relief Valve	3	0.0093	0	0	0	1	0	0	0	0	0	0	0	0	0	0
Air	APC	Nitrogen Interface Assembly	7.5	0.0122	5.5	5.5	0	1	0	0	0	0	0	0	0	0	0	0
Air	APC	Vacuum Access Jumper 5-ft	0.7	0.00043	0	0	0	0	0	1	0	0	0	0	0	0	0	0
Air	APC	Vacuum Access Jumper 35-ft	3.2	0.003	0	0	0	0	0	1	0	0	0	0	0	0	0	0
Air	ACMA	Verification Gas Assembly	5.4	0.0136	0.1	0.1	0	0.5	0	0	0	0	0	0	0.5	0	0	0
Air	ACMA	Mass Spectrometer	13.9	0.0238	31.8	31.8	0	0.5	0	0.5	0	0	0	0	0	0	0	0
Air	ACMA	Sample Pump	3.4	0.0045	4	4	0	1	0	0	0	0	0	0	0	0	0	0
Air	ACMA	Sample Distributor	2.1	0.0045	0.1	0.1	0	0.95	0	0	0.05	0	0	0	0	0	0	0
Air	ACMA	Data & Control	8	0.0141	34.9	34.9	0	0.5	0	0.5	0	0	0	0	0	0	0	0
Air	ACMA	Low Volt. Power supply	5.7	0.0054	30.8	30.8	0	0.7	0	0	0	0	0.1	0.1	0	0	0	0.1
Air	ACMA	Chassis	15.8	0.0238	0	0	0	1	0	0	0	0	0	0	0	0	0	0
Air	ACMA	Inlet Valve Assembly	0	0	0	0	0	0.9	0	0	0.01	0	0	0	0	0	0.09	0
Air	ACMA	EMI Filter	0	0	1.8	1.8	0	0.98	0.02	0	0	0	0	0	0	0	0	0
Air	SDS	3-way solenoid valves	31.5	0.0345	0	0	0	1	0	0	0	0	0	0	0	0	0	0
Air	SDS	Manual valves	2.53	0.0066	0	0	0	1	0	0	0	0	0	0	0	0	0	0
Air	SDS	Sample probes	1.08	0.00024	0	0	0	1	0	0	0	0	0	0	0	0	0	0
Air	CO2_removal_4BMS	Air Selector Valve	12.6497	0.00827099	0.684802	0.684802	2.73973	0.9	0	0	0	0	0	0	0.1	0	0	0
Air	CO2_removal_4BMS	Desiccant Bed	23.6941	0.24242	0	0	0.657534	0.4	0	0	0	0	0	0.6	0	0	0	0
Air	CO2_removal_4BMS	Adsorbent Bed	32.3226	0	564.277	564.277	0	0.5	0	0	0.2	0	0	0.3	0	0	0	0
Air	CO2_removal_4BMS	Air Check Valve	0.162176	0	0	0	0	1	0	0	0	0	0	0	0	0	0	0
Air	CO2_removal_4BMS	Heater Controller	6.6	0.0016	38	38	0.0273973	0.8	0	0.2	0	0	0	0	0	0	0	0
Air	CO2_removal_4BMS	Air Blower	0.810881	0.020272	39.7185	39.7185	0.178082	1	0	0	0	0	0	0	0	0	0	0
Air	CO2_removal_4BMS	Precooler	2.18938	0	0	0	0	1	0	0	0	0	0	0	0	0	0	0
Air	CO2_removal_4BMS	Blower/precooler Motor Controller	1.3	0	5	5	0	0.6	0	0.4	0	0	0	0	0	0	0	0
Air	CO2_removal_4BMS	CO2 Pump	6.64922	0.00364896	13.0112	13.0112	0.109589	0.99	0	0	0	0	0	0	0	0	0	0.01
Air	CO2_removal_4BMS	CO2 Pump Motor Controller	1.3	0.0057	2	2	0.0136986	0.3	0	0.7	0	0	0	0	0	0	0	0
Air	CO2_removal_4BMS	Temperature Sensor	0.399	0	1	1	0	0	0	0.6	0	0.4	0	0	0	0	0	0
Air	CO2_removal_4BMS	Differential Pressure Sensor	0.2	0	1	1	0	0.1	0.25	0.65	0	0	0	0	0	0	0	0
Air	CO2_removal_4BMS	Absolute Pressure Sensor	0.2	0	1	1	0	0.75	0	0	0	0	0	0.25	0	0	0	0
Air	CO2_removal_4BMS	Electrical Harness	4.5	0	0	0	0	0.9	0.05	0	0.05	0	0	0	0	0	0	0
Air	CO2_removal_4BMS	Plumbing	4.7842	0	0	0	0	1	0	0	0	0	0	0	0	0	0	0
Air	CO2_removal_4BMS	Support Structure	29.2728	0	0	0	0	1	0	0	0	0	0	0	0	0	0	0
Air	CO2_removal_4BMS	Fluid Disconnects	1.94611	0	0	0	0	1	0	0	0	0	0	0	0	0	0	0
Air	CO2_removal_4BMS	Electronics coldplate	2.67591	0	0	0	0	1	0	0	0	0	0	0	0	0	0	0
Air	CO2_removal_4BMS	Electronics Interface Plate	1.6	0	0	0	0	1	0	0	0	0	0	0	0	0	0	0
Air	N2_storage	MD Shield Instl	0	0	0	0	0	1	0	0	0	0	0	0	0	0	0	0
Air	N2_storage	Multilayer Insulation Assembly-T #1	0	0	0	0	0	1	0	0	0	0	0	0	0	0	0	0
Air	N2_storage	Multilayer Insulation Assembly-T #2	0	0	0	0	0	1	0	0	0	0	0	0	0	0	0	0
Air	N2_storage	Primary Structure Assembly -HPG ORU	0	0	0	0	0	0.5	0	0	0	0	0	0	0.5	0	0	0
Air	N2_storage	Tank ORU Assembly	0	0	0	0	0	1	0	0	0	0	0	0	0	0	0	0
Air	N2_storage	Utilities Installation - O2/N2 Tank	0	0	0	0	0	0.5	0	0	0	0	0	0	0.5	0	0	0
Air	N2_storage	N2 Bare Tank	163.98	0	0	0	0	0.9	0	0	0	0	0.05	0	0.05	0	0	0
Air	N2_storage	HPGA Fluid	144.731	0	0	0	0	0	0	0	0	0	0	0	0	0	1	0
Air	N2_storage	Handhold, top mounted	0.382085	0	0	0	0	0	1	0	0	0	0	0	0	0	0	0
Air	N2_storage	Handrail 21.941 in custom	0.668649	0	0	0	0	0	1	0	0	0	0	0	0	0	0	0
Air	N2_storage	Handrail, top mounted	0.700489	0	0	0	0	0	1	0	0	0	0	0	0	0	0	0
Air	N2_storage	Grapple fixture, flt releasable	19.6774	0	0	0	0	0.5	0	0.5	0	0	0	0	0	0	0	0
Air	N2_storage	Accessories	8.20724	0	0	0	0	0	0	0	0	0	0	0	0	0	0	0
Air	O2_storage	MD Shield Instl	0	0	0	0	0	1	0	0	0	0	0	0	0	0	0	0
Air	O2_storage	Multilayer Insulation Assembly-T #1	0	0	0	0	0	1	0	0	0	0	0	0	0	0	0	0
Air	O2_storage	Multilayer Insulation Assembly-T #2	0	0	0	0	0	1	0	0	0	0	0	0	0	0	0	0
Air	O2_storage	Primary Structure Assembly -HPG ORU	0	0	0	0	0	0.5	0	0	0	0	0	0	0.5	0	0	0
Air	O2_storage	Tank ORU Assembly	0	0	0	0	0	1	0	0	0	0	0	0	0	0	0	0
Air	O2_storage	Utilities Installation - O2/N2 Tank	0	0	0	0	0	0.5	0	0	0	0	0	0	0.5	0	0	0
Air	O2_storage	O2 Bare Tank	112.189	0	0	0	0	0.95	0	0	0	0	0	0	0.05	0	0	0
Air	O2_storage	HPGA Fluid	72.7976	0	0	0	0	0	0	0	0	0	0	0	0	0	1	0
Air	O2_storage	Handhold, top mounted	0.192184	0	0	0	0	0	1	0	0	0	0	0	0	0	0	0
Air	O2_storage	Handrail 21.941 in custom	0.336321	0	0	0	0	0	1	0	0	0	0	0	0	0	0	0
Air	O2_storage	Handrail, top mounted	0.352337	0	0	0	0	0	1	0	0	0	0	0	0	0	0	0
Air	O2_storage	Grapple fixture, flt releasable	9.89746	0	0	0	0	0.5	0	0.5	0	0	0	0	0	0	0	0
Air	O2_storage	Accessories	5.61509	0	0	0	0	0	0	0	0	0	0	0	0	0	0	0
Air	CO2_reduction_sabatier	Condensing Heat Exchanger	1.48461	0	0	0	0	0.9	0	0.1	0	0	0	0	0	0	0	0
Air	CO2_reduction_sabatier	AAA heat exchanger	2.49202	0	0	0	0	1	0	0	0	0	0	0	0	0	0	0
Air	CO2_reduction_sabatier	ITCS Coolant Water Inlet QD	0.477195	0	0	0	0	1	0	0	0	0	0	0	0	0	0	0
Air	CO2_reduction_sabatier	ITCS Coolant Water Outlet QD	0.360547	0	0	0	0	1	0	0	0	0	0	0	0	0	0	0
Air	CO2_reduction_sabatier	Heat Exchanger Inlet Temp	0.363636	0	0	0	0	1	0	0	0	0	0	0	0	0	0	0
Air	CO2_reduction_sabatier	Heat Exchanger Outlet Temp	0.363636	0	0	0	0	1	0	0	0	0	0	0	0	0	0	0
Air	CO2_reduction_sabatier	Manifold, CO2	4.77195	0	0	0	0	0.95	0.05	0	0	0	0	0	0	0	0	0
Air	CO2_reduction_sabatier	CO2 Inlet Check Valve	0.106043	0	0	0	0	0.9	0.1	0	0	0	0	0	0	0	0	0
Air	CO2_reduction_sabatier	CO2 Inlet Filter	0.0555267	0	0	0	0	1	0	0	0	0	0	0	0	0	0	0
Air	CO2_reduction_sabatier	Pressure sensor, CO2 Inlet	0.409091	0	0	0	0	0	0	0.6	0	0.4	0	0	0	0	0	0
Air	CO2_reduction_sabatier	CO2 Inlet QD	0.477195	0	0	0	0	1	0	0	0	0	0	0	0	0	0	0
Air	CO2_reduction_sabatier	CO2 Inlet Regulator	0.927879	0	0	0	0	0.9	0.05	0	0	0.05	0	0	0	0	0	0
Air	CO2_reduction_sabatier	CO2 Inlet NC Solenoid	0.477195	0	0	0	0	1	0	0	0	0	0	0	0	0	0	0
Air	CO2_reduction_sabatier	CO2 Inlet Flow Control	2.17389	0	0	0	0	0.85	0.05	0	0	0.1	0	0	0	0	0	0
Air	CO2_reduction_sabatier	CO2 Flow Control Orifice	0.0530216	0	0	0	0	1	0	0	0	0	0	0	0	0	0	0
Air	CO2_reduction_sabatier	Delta P Sensor, Flow Sensor CO2	0.909091	0	0	0	0	0	0	0.6	0	0.4	0	0	0	0	0	0
Air	CO2_reduction_sabatier	CO2 Flow Meter Orifice	0.0265108	0	0	0	0	1	0	0	0	0	0	0	0	0	0	0
Air	CO2_reduction_sabatier	Manifold, Hydrogen	4.42731	0	0	0	0	0.95	0.05	0	0	0	0	0	0	0	0	0
Air	CO2_reduction_sabatier	Water Outlet Quick Disconnect	0.477195	0	0	0	0	1	0	0	0	0	0	0	0	0	0	0
Air	CO2_reduction_sabatier	Hydrogen Inlet Check Valve	0.106043	0	0	0	0	0.9	0.1	0	0	0	0	0	0	0	0	0
Air	CO2_reduction_sabatier	Hydrogen Inlet Filter	0.0555267	0	0	0	0	1	0	0	0	0	0	0	0	0	0	0
Air	CO2_reduction_sabatier	H2O Outlet Pressure Sensor	0.818182	0	0	0	0	0	0	0.6	0	0.4	0	0	0	0	0	0
Air	CO2_reduction_sabatier	Hydrogen Inlet Quick Disconnect	0.477195	0	0	0	0	1	0	0	0	0	0	0	0	0	0	0
Air	CO2_reduction_sabatier	Hydrogen Inlet NC Solenoid	0.95439	0	0	0	0	1	0	0	0	0	0	0	0	0	0	0
Air	CO2_reduction_sabatier	Delta P Sensor, Flow Sensor H2	0.909091	0	0	0	0	0	0	0.6	0	0.4	0	0	0	0	0	0
Air	CO2_reduction_sabatier	H2 Flow Meter Orifice	0.0265108	0	0	0	0	1	0	0	0	0	0	0	0	0	0	0
Air	CO2_reduction_sabatier	Manifold, Vent	5.11659	0	0	0	0	0.95	0.05	0	0	0	0	0	0	0	0	0
Air	CO2_reduction_sabatier	Liquid Sensor	1.09091	0	0	0	0	0	0.5	0.5	0	0	0	0	0	0	0	0
Air	CO2_reduction_sabatier	Vent Pressure Sensor	0.818182	0	0	0	0	0	0	0.6	0	0.4	0	0	0	0	0	0
Air	CO2_reduction_sabatier	Vent Outlet Quick Disconnect	0.477195	0	0	0	0	1	0	0	0	0	0	0	0	0	0	0
Air	CO2_reduction_sabatier	Vent Regulator	0.927879	0	0	0	0	0.9	0.05	0	0	0.05	0	0	0	0	0	0
Air	CO2_reduction_sabatier	Vent Relief/Check #1	0.159065	0	0	0	0	1	0	0	0	0	0	0	0	0	0	0
Air	CO2_reduction_sabatier	Vent Relief/Check #2	0.159065	0	0	0	0	1	0	0	0	0	0	0	0	0	0	0
Air	CO2_reduction_sabatier	Vent Outlet NO Solenoid	0.95439	0	0	0	0	1	0	0	0	0	0	0	0	0	0	0
Air	CO2_reduction_sabatier	Water Pressure Sensor	0.818182	0	0	0	0	0	0	0.6	0	0.4	0	0	0	0	0	0
Air	CO2_reduction_sabatier	Water Relief	0.159065	0	0	0	0	1	0	0	0	0	0	0	0	0	0	0
Air	CO2_reduction_sabatier	Water Outlet NC Solenoid	0.477195	0	0	0	0	1	0	0	0	0	0	0	0	0	0	0
Air	CO2_reduction_sabatier	Rotary Water Separator Assembly	4.08267	0	22.8444	22.8444	0	1	0	0	0	0	0	0	0	0	0	0
Air	CO2_reduction_sabatier	Sabatier Reactor Assembly	2.54504	0	3.26349	3.26349	0	0.9	0	0.1	0	0	0	0	0	0	0	0
Air	CO2_reduction_sabatier	Structure (A/R)	9.25228	0	0	0	0	1	0	0	0	0	0	0	0	0	0	0
Air	CO2_reduction_sabatier	Miscellaneous Hardware (Clampts, bolts, etc.) (A/R)	1.77273	0	0	0	0	1	0	0	0	0	0	0	0	0	0	0
Air	CO2_reduction_sabatier	Air Cooling NC Solenoid	0.63626	0	0	0	0	1	0	0	0	0	0	0	0	0	0	0
Air	CO2_reduction_sabatier	Air Inlet Filter	0.111053	0	0	0	0	1	0	0	0	0	0	0	0	0	0	0
Air	CO2_reduction_sabatier	Air Sabatier Orifice	0.0530216	0	0	0	0	1	0	0	0	0	0	0	0	0	0	0
Air	CO2_reduction_sabatier	Heat Exchanger Inlet Duct	0.106043	0	0	0	0	1	0	0	0	0	0	0	0	0	0	0
Air	CO2_reduction_sabatier	Heat Exchanger Outlet Duct	0.106043	0	0	0	0	1	0	0	0	0	0	0	0	0	0	0
Air	CO2_reduction_sabatier	Reactor Inlet Duct	0.212087	0	0	0	0	1	0	0	0	0	0	0	0	0	0	0
Air	CO2_reduction_sabatier	Reactor Outlet Duct	0.106043	0	0	0	0	1	0	0	0	0	0	0	0	0	0	0
Air	CO2_reduction_sabatier	Tubing (A/R)	0.689281	0	0	0	0	1	0	0	0	0	0	0	0	0	0	0
Air	CO2_reduction_sabatier	Harnesses	11.4545	0	0	0	0	0.9	0.05	0	0.05	0	0	0	0	0	0	0
Air	CO2_reduction_sabatier	Valves & Sensors' total power	0	0	7.63492	7.63492	0	0	0	1	0	0	0	0	0	0	0	0
Air	CO2_reduction_sabatier	Mechanical Compressor ORU	19.0878	0	45.6889	45.6889	0	0.9	0.1	0	0	0	0	0	0	0	0	0.001
Air	CO2_reduction_sabatier	Compressor Manifold Assembly	4.6659	0	0	0	0	0.95	0.05	0	0	0	0	0	0	0	0	0
Air	CO2_reduction_sabatier	Controller Assembly	28.5909	0	55	55	0	0	0.2	0.8	0	0	0	0	0	0	0	0
Air	CO2_reduction_sabatier	CO2 Accumulator	10.135	0.011968	0	0	0	1	0	0	0	0	0	0	0	0	0	0
Air	OGS_ISS	Deionizing Bed ORU (Inlet)	8.06724	0.00989705	0	0	0	0.05	0.15	0	0	0	0	0	0	0	0	0.8
Air	OGS_ISS	Deionizing Bed ORU (Recirculating)	8.06724	0.00989705	0	0	0	0.05	0.15	0	0	0	0	0	0	0	0	0.8
Air	OGS_ISS	Oxygen/Water ORU	36.8153	0.0250383	0	0	0	0.333333	0	0	0	0	0	0	0.333333	0	0.333333	0
Air	OGS_ISS	Pump ORU	6.5297	0.00604749	24.1514	24.1514	0	1	0	0	0	0	0	0	0	0	0	0
Air	OGS_ISS	Oxygen Phase Separator ORU	22.0843	0.00550756	0	0	0	1	0	0	0	0	0	0	0	0	0	0
Air	OGS_ISS	Hydrogen ORU	96.5566	0.0511271	31.8665	31.8665	0	1	0	0	0	0	0	0	0	0	0	0
Air	OGS_ISS	Hydrogen Sensor ORU	4.59	0.00344	0	0	0	1	0	0	0	0	0	0	0	0	0	0
Air	OGS_ISS	Process Controller	40.09	0.1359	148	148	0	0.3	0.001	0.7	0	0	0	0	0	0	0	0
Air	OGS_ISS	Power Supply Module (PSM)	13.9206	0.0217698	1106.94	553.47	0	0.7	0	0	0	0	0.1	0.1	0	0	0	0.1
Air	Fire_det_sup	Fire Detection Assembly	1.5	0.0028	1.48	1.48	0.0821918	0.05	0.9	0.05	0	0	0	0	0	0	0	0
Air	Fire_det_sup	Portable Fire Extinguisher	6.8	0.0405	0	0	0	0.6	0	0	0	0	0	0	0.2	0	0	0.2
Air	ACO2R	Regenerator 1	45.3	0.17	397	397	0	0.98	0.01	0	0	0.01	0	0	0	0	0	0
Air	ACO2R	Metox Canisters	136	0.057	0	0	0	1	0	0	0	0	0	0	0	0	0	0
Air	TCCS_ISS	Activated charcoal bed	12.8724	0.0265797	0	0	0	0	0.5	0	0	0	0	0.5	0	0	0	0
Air	TCCS_ISS	Blower Assembly	2.48571	0.00488571	30.3929	30.3929	0	0.8	0	0.2	0	0	0	0	0	0	0	0
Air	TCCS_ISS	Flow Meter Assembly	1.1	0.0003	11.5	11.5	0	0.7	0.1	0.1	0	0.1	0	0	0	0	0	0
Air	TCCS_ISS	Catalytic Oxidizer Assembly	8.45714	0.0185143	92.1905	92.1905	0	1	0	0	0	0	0	0	0	0	0	0
Air	TCCS_ISS	LiOH Sorbent bed assembly	0.873304	0.00168271	0	0	0	0.07	0.03	0	0	0	0	0.9	0	0	0	0
Air	TCCS_ISS	Electrical interface assembly	4.5	0.00487	7.6	7.6	0	0	0	1	0	0	0	0	0	0	0	0
Waste	PMWC	Aluminum Compaction cylinder	9.41404	0.0234156	0	0	500	1	0	0	0	0	0	0	0	0	0	0
Waste	PMWC	Band-type heating unit	0	0	162.389	0	0	0.9	0	0	0	0	0	0.1	0	0	0	0
Waste	PMWC	Commercial Lightweight, oil-less, compressor/vacuum pump	0	0	3.22474	0	0	0.9	0	0.1	0	0	0	0	0	0	0	0
Waste	PMWC	Temperature sensor	0.224	0	0	0	0	0	0	0.6	0	0.4	0	0	0	0	0	0
Waste	PMWC	Pressure sensor	0.304	0	0.33	0	0	0.1	0.25	0.65	0	0	0	0	0	0	0	0
Waste	PMWC	Housing & Mounting Equipment	23.8935	0.47787	0	0	0	1	0	0	0	0	0	0	0	0	0	0
Waste	PMWC	Condensing Heat Exchanger	2.85647	0.00567605	0	0	0	1	0	0	0	0	0	0	0	0	0	0
Waste	PMWC	Cooling system	0	0	144.973	144.973	0	1	0	0	0	0	0	0	0	0	0	0
Waste	Waste_storage	Low Density PolyEthylene Box	49.1803	1.36612	0	0	0	0	1	0	0	0	0	0	0	0	0	0
Waste	Waste_collection_ISS	Commode/Urinal	58.4	0.3	0	0	82.1918	0	1	0	0	0	0	0	0	0	0	0
Waste	Waste_collection_ISS	Fan	0	0	102	102	0	1	0	0	0	0	0	0	0	0	0	0
Waste	Waste_collection_ISS	Urine Separator	0	0	125	125	0	0.9	0	0.09	0.01	0	0	0	0	0	0	0
Waste	Waste_collection_ISS	Urine Vent Heater	0	0	14	14	0	1	0	0	0	0	0	0	0	0	0	0
Waste	Waste_collection_ISS	Fecal Bags	54.5455	0.609	0	0	0	0	0	0	1	0	0	0	0	0	0	0
Waste	Waste_collection_ISS	Wipes, Dry	18.1818	0.245806	0	0	0	0	0	0	1	0	0	0	0	0	0	0
Waste	Waste_collection_ISS	Wipes, Wet	28.4091	0.147484	0	0	0	0	0	0	0.6	0	0	0	0	0	0.4	0
Waste	Waste_collection_ISS	Wipes, Toilet Tissue	9.81818	0.119876	0	0	0	0	0	0	0	0	0	0	0	0	0	1
Waste	Waste_collection_ISS	Gloves	15.5455	0.0707921	0	0	0	0	1	0	0	0	0	0	0	0	0	0
Waste	Waste_collection_ISS	Fecal Bags Odor Lids	81.8182	0.765	0	0	0	0	1	0	0	0	0	0	0	0	0	0
Waste	Waste_collection_ISS	Fecal collection Canisters	97.4026	1.275	0	0	0	0	0.9	0	0.1	0	0	0	0	0	0	0
Waste	Waste_collection_ISS	Fecal collection Canisters lids	48.7013	0.199286	0	0	0	0	1	0	0	0	0	0	0	0	0	0
Waste	Waste_collection_ISS	Urine Prefilters	85.2273	0.4635	0	0	0	1	0	0	0	0	0	0	0	0	0	0
Waste	Waste_collection_ISS	Urine Filters	12.1753	0.0983571	0	0	0	0	0	0	1	0	0	0	0	0	0	0
Waste	Waste_collection_ISS	Urine Funnels	1.16364	0.006552	0	0	0	1	0	0	0	0	0	0	0	0	0	0
Waste	Waste_collection_ISS	Flush Water Transfer Bags	15.5844	0.2175	0	0	0	0	0.3	0	0.7	0	0	0	0	0	0	0
Waste	TCCS_ISS_2	Activated charcoal bed	25.7447	0.0531594	0	0	0	0	0.5	0	0	0	0	0	0	0	0	0.5
Waste	TCCS_ISS_2	Blower Assembly	4.97143	0.00977143	60.7857	60.7857	0	0.8	0	0.2	0	0	0	0	0	0	0	0
Waste	TCCS_ISS_2	Flow Meter Assembly	2.2	0.0006	23	23	0	0.7	0.1	0.1	0	0.1	0	0	0	0	0	0
Waste	TCCS_ISS_2	Catalytic Oxidizer Assembly	16.9143	0.0370286	184.381	184.381	0	1	0	0	0	0	0	0	0	0	0	0
Waste	TCCS_ISS_2	LiOH Sorbent bed assembly	1.74661	0.00336542	0	0	0	0.07	0.03	0	0	0	0	0.9	0	0	0	0
Waste	TCCS_ISS_2	Electrical interface assembly	9	0.00974	15.2	15.2	0	0	0	1	0	0	0	0	0	0	0	0
Water	VCD_ISS	MLS Filter ORU	10.9676	0.0153878	0	0	0	0.5	0	0.5	0	0	0	0	0	0	0	0
Water	VCD_ISS	Particulate Filter ORU	56.8269	0.144504	0	0	0	0.9	0	0	0	0	0	0	0	0	0	0.1
Water	VCD_ISS	Multifiltration Bed #1 & #2 ORUs	464.08	0.604362	0	0	0	0.07	0.03	0	0	0	0	0	0	0	0.9	0
Water	VCD_ISS	Sensor ORU	3.64	0.0093	2.13	2.13	0	0	0.6	0.2	0	0.2	0	0	0	0	0	0
Water	VCD_ISS	Piping	0.738641	0.00100529	0	0	0	1	0	0	0	0	0	0	0	0	0	0
Water	VCD_ISS	Pump/MLS ORU	18.3951	0.057701	19.5382	19.5382	0	0.5	0	0.5	0	0	0	0	0	0	0	0
Water	VCD_ISS	Catalytic Reactor & Preheeater ORU	0	0	107.471	107.471	0	1	0	0	0	0	0	0	0	0	0	0
Water	VCD_ISS	Oxygen Filter	0	0	0	0	0	0.5	0.5	0	0	0	0	0	0	0	0	0
Water	VCD_ISS	Microbial Check Valve	5.13472	0.00894791	0	0	0	0.99	0	0	0	0	0	0	0	0	0	0.01
Water	Potable_water_tank	Gas Separator ORU	26.1951	0.0571021	50.5295	50.5295	0	0.9	0.1	0	0	0	0	0	0	0	0	0.001
Water	Potable_water_tank	Hygiene H2O Tank	58.2667	0.108547	4.7099	4.7099	0	0	1	0	0	0	0	0	0	0	0	0
Water	WRS	Product H2O Tank	32.7904	0.116467	5.24364	5.24364	0	0	1	0	0	0	0	0	0	0	0	0
Water	WRS	Process Controller	36.91	0.0838	156.18	156.18	0	0.3	0.001	0.7	0	0	0	0	0	0	0	0
Water	WRS	Reactor Health Sensor	8.64	0.0422	4.72	4.72	0	0.1	0.2	0.6	0	0	0	0.1	0	0	0	0
Water	WRS	H2O Delivery System	26.1086	0.0648222	1.92579	1.92579	0	0.9	0	0	0	0	0.1	0	0	0	0	0
Water	WRS	Ion Exchange Bed	7.70283	0.0104835	0	0	0	0.07	0.03	0	0	0	0	0	0	0	0.9	0
Water	WRS	Pressure Control & Pump (PCPA)	33.6413	0.0548189	9.77434	9.77434	0	0.7	0.2	0.1	0	0	0	0	0	0	0	0
Water	WRS	Fluid Control & Pump (FCPA)	34.2562	0.0543689	14.1775	14.1775	0	0.7	0.2	0.1	0	0	0	0	0	0	0	0
Water	WRS	Recycle Filter Tank (RFTA)	14.3159	0.0764165	0	0	0	0	1	0	0	0	0	0	0	0	0	0
Water	WRS	Wastewater Storage Tank Assembly (WSTA)	35.891	0.0308216	0.139967	0.139967	0	1	0	0	0	0	0	0	0	0	0	0
Water	WRS	Distillation Assembly (DA)	56.7912	0.113387	135.464	135.464	0	0.6	0	0.1	0	0.3	0	0	0	0	0	0
Water	WRS	Separator Plumbing Assembly (SPA)	12.2386	0.0186729	0	0	0	0.99	0.01	0	0	0	0	0	0	0	0	0
Water	WRS	Power Module (Included in FCA)	0	0	0	0	0	0	0	0	0	0	0	0	0	0	0	0
Water	WRS	Firmware Controller Assembly (Data module, power module)	24.09	0.0286	150.09	150.09	0	0.8	0	0.2	0	0	0	0	0	0	0	0
Water	WRS	Piping	9.35671	0.0174243	0	0	0	1	0	0	0	0	0	0	0	0	0	0
Water	Volatile_removal_assembly	Catalytic Reactor & Preheeater ORU	0	0	90.481	90.481	0	1	0	0	0	0	0	0	0	0	0	0
Water	Volatile_removal_assembly	Gas Separator ORU	24.5428	0.0535004	42.5412	42.5412	0	0.9	0.1	0	0	0	0	0	0	0	0	0.001
Water	Volatile_removal_assembly	Oxygen Filter	0	0	0	0	0	0.5	0.5	0	0	0	0	0	0	0	0	0
Water	Volatile_removal_assembly	Piping	1.26268	0.00267502	0	0	0	1	0	0	0	0	0	0	0	0	0	0
Water	WRS	Product H2O Tank	137.092	0.486932	18.0688	18.0688	0	0	1	0	0	0	0	0	0	0	0	0
Water	WRS	H2O Stored	370.553	0	0	0	0	0	0	0	0	0	0	0	0	0	1	0
Food	Stored_food	Packaging	2707.39	0	0	0	0	0.01	0.99	0	0	0	0	0	0	0	0	0
Food	Food_storage	Storage	663.883	9.26348	0	0	0	0.25	0.25	0	0	0	0	0	0	0.5	0	0
Food	Food_processing	Rehydration Unit and Conduction Oven	36.3	0.094	10	10	0	0.7	0.05	0.25	0	0	0	0	0	0	0	0
Thermal	CCAA	Inlet ORU	0	0	299.078	299.078	0	1	0	0	0	0	0	0	0	0	0	0
Thermal	CCAA	Condensing heat exchanger	34.8955	0.0692142	0	0	0	1	0	0	0	0	0	0	0	0	0	0
Thermal	CCAA	Water separator	5.30407	0.0365937	3.35284	3.35284	0	0.99	0	0	0	0	0	0	0	0	0	0.01
Thermal	CCAA	Temp. Control & Check Valve	3.88821	0.026388	0.059869	0.059869	0	0.8	0.15	0	0.05	0	0	0	0	0	0	0
Thermal	CCAA	Electrical Interface Box (EIB)	4.1	0.0113	8	8	0	0.9	0	0.1	0	0	0	0	0	0	0	0
Thermal	CCAA	Temp. Sensor	0.24	0.0006	0.01	0.01	0	0	0	0.6	0	0.4	0	0	0	0	0	0
Thermal	CCAA	Liquid Sensor	0.47	0.0006	0.01	0.01	0	0	0.5	0.5	0	0	0	0	0	0	0	0
Thermal	CCAA	Fan Delta P Sensor	0.4	0.00024	0.2	0.2	0	0.9	0	0.1	0	0	0	0	0	0	0	0
Thermal	CCAA	Pressure Sensor	0.3	6e-05	0.2	0.2	0	0.1	0.25	0.65	0	0	0	0	0	0	0	0
Thermal	AMC	HEPA Filter Element	49.22	0.1886	0	0	2.73973	0.7	0	0	0	0.3	0	0	0	0	0	0
Thermal	AMC	Catalytic Filter element	54	0.082	0	0	0	0	0.7	0	0.3	0	0	0	0	0	0	0
Thermal	AC	IMV Fan	4.77	0.0093	55	55	0	0.9	0.05	0	0.05	0	0	0	0	0	0	0
Thermal	AC	IMV Valve	5.1	0.0099	6	6	0	1	0	0	0	0	0	0	0	0	0	0
Thermal	AAA	Avionics Air Assembly	12.4	0.034	175	175	0	0.8	0.1	0	0.1	0	0	0	0	0	0	0
Thermal	ITCS	ITCS	212.492	0.356307	2595.44	2595.44	0	0.9	0	0.1	0	0	0	0	0	0	0	0

## Sheet: case 5 1 trip 5400 days to mars
System	Subsystem	Item	Mass, kg	Volume, m3	Power, watts	Cooling, watts	Crew time, MMH/yr	fraction Structural Metal	fraction Plastic	fraction Electronics	fraction Fabric	fraction Glass	fraction Rubber	fraction Ceramics	fraction Gas	fraction biomass	fraction Water	fraction Other
Air	APC	Vent/Relief Valve	5.4	0.0141	0	0	0	1	0	0	0	0	0	0	0	0	0	0
Air	APC	Pressure control panel	11.2	0.034	18	18	0	0.2	0.1	0.7	0	0	0	0	0	0	0	0
Air	APC	Manual Pressure Equalization Valve	9.6	0.0112	0	0	0	1	0	0	0	0	0	0	0	0	0	0
Air	APC	Positive Pressure Relief Valve	1.8	0.0034	0	0	0	1	0	0	0	0	0	0	0	0	0	0
Air	APC	Negative Pressure Relief Valve	3	0.0093	0	0	0	1	0	0	0	0	0	0	0	0	0	0
Air	APC	Nitrogen Interface Assembly	7.5	0.0122	5.5	5.5	0	1	0	0	0	0	0	0	0	0	0	0
Air	APC	Vacuum Access Jumper 5-ft	0.7	0.00043	0	0	0	0	0	1	0	0	0	0	0	0	0	0
Air	APC	Vacuum Access Jumper 35-ft	3.2	0.003	0	0	0	0	0	1	0	0	0	0	0	0	0	0
Air	ACMA	Verification Gas Assembly	5.4	0.0136	0.1	0.1	0	0.5	0	0	0	0	0	0	0.5	0	0	0
Air	ACMA	Mass Spectrometer	13.9	0.0238	31.8	31.8	0	0.5	0	0.5	0	0	0	0	0	0	0	0
Air	ACMA	Sample Pump	3.4	0.0045	4	4	0	1	0	0	0	0	0	0	0	0	0	0
Air	ACMA	Sample Distributor	2.1	0.0045	0.1	0.1	0	0.95	0	0	0.05	0	0	0	0	0	0	0
Air	ACMA	Data & Control	8	0.0141	34.9	34.9	0	0.5	0	0.5	0	0	0	0	0	0	0	0
Air	ACMA	Low Volt. Power supply	5.7	0.0054	30.8	30.8	0	0.7	0	0	0	0	0.1	0.1	0	0	0	0.1
Air	ACMA	Chassis	15.8	0.0238	0	0	0	1	0	0	0	0	0	0	0	0	0	0
Air	ACMA	Inlet Valve Assembly	0	0	0	0	0	0.9	0	0	0.01	0	0	0	0	0	0.09	0
Air	ACMA	EMI Filter	0	0	1.8	1.8	0	0.98	0.02	0	0	0	0	0	0	0	0	0
Air	SDS	3-way solenoid valves	31.5	0.0345	0	0	0	1	0	0	0	0	0	0	0	0	0	0
Air	SDS	Manual valves	2.53	0.0066	0	0	0	1	0	0	0	0	0	0	0	0	0	0
Air	SDS	Sample probes	1.08	0.00024	0	0	0	1	0	0	0	0	0	0	0	0	0	0
Air	CO2_removal_4BMS	Air Selector Valve	12.5982	0.00823732	0.6793	0.6793	29.589	0.9	0	0	0	0	0	0	0.1	0	0	0
Air	CO2_removal_4BMS	Desiccant Bed	23.5038	0.240472	0	0	7.10137	0.4	0	0	0	0	0	0.6	0	0	0	0
Air	CO2_removal_4BMS	Adsorbent Bed	32.063	0	559.743	559.743	0	0.5	0	0	0.2	0	0	0.3	0	0	0	0
Air	CO2_removal_4BMS	Air Check Valve	0.161516	0	0	0	0	1	0	0	0	0	0	0	0	0	0	0
Air	CO2_removal_4BMS	Heater Controller	6.6	0.0016	38	38	0.29589	0.8	0	0.2	0	0	0	0	0	0	0	0
Air	CO2_removal_4BMS	Air Blower	0.80758	0.0201895	39.3994	39.3994	1.92329	1	0	0	0	0	0	0	0	0	0	0
Air	CO2_removal_4BMS	Precooler	2.18047	0	0	0	0	1	0	0	0	0	0	0	0	0	0	0
Air	CO2_removal_4BMS	Blower/precooler Motor Controller	1.3	0	5	5	0	0.6	0	0.4	0	0	0	0	0	0	0	0
Air	CO2_removal_4BMS	CO2 Pump	6.62216	0.00363411	12.9067	12.9067	1.18356	0.99	0	0	0	0	0	0	0	0	0	0.01
Air	CO2_removal_4BMS	CO2 Pump Motor Controller	1.3	0.0057	2	2	0.147945	0.3	0	0.7	0	0	0	0	0	0	0	0
Air	CO2_removal_4BMS	Temperature Sensor	0.399	0	1	1	0	0	0	0.6	0	0.4	0	0	0	0	0	0
Air	CO2_removal_4BMS	Differential Pressure Sensor	0.2	0	1	1	0	0.1	0.25	0.65	0	0	0	0	0	0	0	0
Air	CO2_removal_4BMS	Absolute Pressure Sensor	0.2	0	1	1	0	0.75	0	0	0	0	0	0.25	0	0	0	0
Air	CO2_removal_4BMS	Electrical Harness	4.5	0	0	0	0	0.9	0.05	0	0.05	0	0	0	0	0	0	0
Air	CO2_removal_4BMS	Plumbing	4.76472	0	0	0	0	1	0	0	0	0	0	0	0	0	0	0
Air	CO2_removal_4BMS	Support Structure	29.1536	0	0	0	0	1	0	0	0	0	0	0	0	0	0	0
Air	CO2_removal_4BMS	Fluid Disconnects	1.93819	0	0	0	0	1	0	0	0	0	0	0	0	0	0	0
Air	CO2_removal_4BMS	Electronics coldplate	2.66501	0	0	0	0	1	0	0	0	0	0	0	0	0	0	0
Air	CO2_removal_4BMS	Electronics Interface Plate	1.6	0	0	0	0	1	0	0	0	0	0	0	0	0	0	0
Air	N2_storage	MD Shield Instl	0	0	0	0	0	1	0	0	0	0	0	0	0	0	0	0
Air	N2_storage	Multilayer Insulation Assembly-T #1	0	0	0	0	0	1	0	0	0	0	0	0	0	0	0	0
Air	N2_storage	Multilayer Insulation Assembly-T #2	0	0	0	0	0	1	0	0	0	0	0	0	0	0	0	0
Air	N2_storage	Primary Structure Assembly -HPG ORU	0	0	0	0	0	0.5	0	0	0	0	0	0	0.5	0	0	0
Air	N2_storage	Tank ORU Assembly	0	0	0	0	0	1	0	0	0	0	0	0	0	0	0	0
Air	N2_storage	Utilities Installation - O2/N2 Tank	0	0	0	0	0	0.5	0	0	0	0	0	0	0.5	0	0	0
Air	N2_storage	N2 Bare Tank	1443.26	0	0	0	0	0.9	0	0	0	0	0.05	0	0.05	0	0	0
Air	N2_storage	HPGA Fluid	1107.91	0	0	0	0	0	0	0	0	0	0	0	0	0	1	0
Air	N2_storage	Handhold, top mounted	2.92487	0	0	0	0	0	1	0	0	0	0	0	0	0	0	0
Air	N2_storage	Handrail 21.941 in custom	5.11852	0	0	0	0	0	1	0	0	0	0	0	0	0	0	0
Air	N2_storage	Handrail, top mounted	5.36225	0	0	0	0	0	1	0	0	0	0	0	0	0	0	0
Air	N2_storage	Grapple fixture, flt releasable	150.631	0	0	0	0	0.5	0	0.5	0	0	0	0	0	0	0	0
Air	N2_storage	Accessories	72.2357	0	0	0	0	0	0	0	0	0	0	0	0	0	0	0
Air	O2_storage	MD Shield Instl	0	0	0	0	0	1	0	0	0	0	0	0	0	0	0	0
Air	O2_storage	Multilayer Insulation Assembly-T #1	0	0	0	0	0	1	0	0	0	0	0	0	0	0	0	0
Air	O2_storage	Multilayer Insulation Assembly-T #2	0	0	0	0	0	1	0	0	0	0	0	0	0	0	0	0
Air	O2_storage	Primary Structure Assembly -HPG ORU	0	0	0	0	0	0.5	0	0	0	0	0	0	0.5	0	0	0
Air	O2_storage	Tank ORU Assembly	0	0	0	0	0	1	0	0	0	0	0	0	0	0	0	0
Air	O2_storage	Utilities Installation - O2/N2 Tank	0	0	0	0	0	0.5	0	0	0	0	0	0	0.5	0	0	0
Air	O2_storage	O2 Bare Tank	1010.35	0	0	0	0	0.95	0	0	0	0	0	0	0.05	0	0	0
Air	O2_storage	HPGA Fluid	506.64	0	0	0	0	0	0	0	0	0	0	0	0	0	1	0
Air	O2_storage	Handhold, top mounted	1.33752	0	0	0	0	0	1	0	0	0	0	0	0	0	0	0
Air	O2_storage	Handrail 21.941 in custom	2.34065	0	0	0	0	0	1	0	0	0	0	0	0	0	0	0
Air	O2_storage	Handrail, top mounted	2.45211	0	0	0	0	0	1	0	0	0	0	0	0	0	0	0
Air	O2_storage	Grapple fixture, flt releasable	68.882	0	0	0	0	0.5	0	0.5	0	0	0	0	0	0	0	0
Air	O2_storage	Accessories	50.5683	0	0	0	0	0	0	0	0	0	0	0	0	0	0	0
Air	CO2_reduction_sabatier	Condensing Heat Exchanger	1.48086	0	0	0	0	0.9	0	0.1	0	0	0	0	0	0	0	0
Air	CO2_reduction_sabatier	AAA heat exchanger	2.48573	0	0	0	0	1	0	0	0	0	0	0	0	0	0	0
Air	CO2_reduction_sabatier	ITCS Coolant Water Inlet QD	0.47599	0	0	0	0	1	0	0	0	0	0	0	0	0	0	0
Air	CO2_reduction_sabatier	ITCS Coolant Water Outlet QD	0.359637	0	0	0	0	1	0	0	0	0	0	0	0	0	0	0
Air	CO2_reduction_sabatier	Heat Exchanger Inlet Temp	0.363636	0	0	0	0	1	0	0	0	0	0	0	0	0	0	0
Air	CO2_reduction_sabatier	Heat Exchanger Outlet Temp	0.363636	0	0	0	0	1	0	0	0	0	0	0	0	0	0	0
Air	CO2_reduction_sabatier	Manifold, CO2	4.7599	0	0	0	0	0.95	0.05	0	0	0	0	0	0	0	0	0
Air	CO2_reduction_sabatier	CO2 Inlet Check Valve	0.105776	0	0	0	0	0.9	0.1	0	0	0	0	0	0	0	0	0
Air	CO2_reduction_sabatier	CO2 Inlet Filter	0.0550806	0	0	0	0	1	0	0	0	0	0	0	0	0	0	0
Air	CO2_reduction_sabatier	Pressure sensor, CO2 Inlet	0.409091	0	0	0	0	0	0	0.6	0	0.4	0	0	0	0	0	0
Air	CO2_reduction_sabatier	CO2 Inlet QD	0.47599	0	0	0	0	1	0	0	0	0	0	0	0	0	0	0
Air	CO2_reduction_sabatier	CO2 Inlet Regulator	0.925537	0	0	0	0	0.9	0.05	0	0	0.05	0	0	0	0	0	0
Air	CO2_reduction_sabatier	CO2 Inlet NC Solenoid	0.47599	0	0	0	0	1	0	0	0	0	0	0	0	0	0	0
Air	CO2_reduction_sabatier	CO2 Inlet Flow Control	2.1684	0	0	0	0	0.85	0.05	0	0	0.1	0	0	0	0	0	0
Air	CO2_reduction_sabatier	CO2 Flow Control Orifice	0.0528878	0	0	0	0	1	0	0	0	0	0	0	0	0	0	0
Air	CO2_reduction_sabatier	Delta P Sensor, Flow Sensor CO2	0.909091	0	0	0	0	0	0	0.6	0	0.4	0	0	0	0	0	0
Air	CO2_reduction_sabatier	CO2 Flow Meter Orifice	0.0264439	0	0	0	0	1	0	0	0	0	0	0	0	0	0	0
Air	CO2_reduction_sabatier	Manifold, Hydrogen	4.41613	0	0	0	0	0.95	0.05	0	0	0	0	0	0	0	0	0
Air	CO2_reduction_sabatier	Water Outlet Quick Disconnect	0.47599	0	0	0	0	1	0	0	0	0	0	0	0	0	0	0
Air	CO2_reduction_sabatier	Hydrogen Inlet Check Valve	0.105776	0	0	0	0	0.9	0.1	0	0	0	0	0	0	0	0	0
Air	CO2_reduction_sabatier	Hydrogen Inlet Filter	0.0550806	0	0	0	0	1	0	0	0	0	0	0	0	0	0	0
Air	CO2_reduction_sabatier	H2O Outlet Pressure Sensor	0.818182	0	0	0	0	0	0	0.6	0	0.4	0	0	0	0	0	0
Air	CO2_reduction_sabatier	Hydrogen Inlet Quick Disconnect	0.47599	0	0	0	0	1	0	0	0	0	0	0	0	0	0	0
Air	CO2_reduction_sabatier	Hydrogen Inlet NC Solenoid	0.951981	0	0	0	0	1	0	0	0	0	0	0	0	0	0	0
Air	CO2_reduction_sabatier	Delta P Sensor, Flow Sensor H2	0.909091	0	0	0	0	0	0	0.6	0	0.4	0	0	0	0	0	0
Air	CO2_reduction_sabatier	H2 Flow Meter Orifice	0.0264439	0	0	0	0	1	0	0	0	0	0	0	0	0	0	0
Air	CO2_reduction_sabatier	Manifold, Vent	5.10367	0	0	0	0	0.95	0.05	0	0	0	0	0	0	0	0	0
Air	CO2_reduction_sabatier	Liquid Sensor	1.09091	0	0	0	0	0	0.5	0.5	0	0	0	0	0	0	0	0
Air	CO2_reduction_sabatier	Vent Pressure Sensor	0.818182	0	0	0	0	0	0	0.6	0	0.4	0	0	0	0	0	0
Air	CO2_reduction_sabatier	Vent Outlet Quick Disconnect	0.47599	0	0	0	0	1	0	0	0	0	0	0	0	0	0	0
Air	CO2_reduction_sabatier	Vent Regulator	0.925537	0	0	0	0	0.9	0.05	0	0	0.05	0	0	0	0	0	0
Air	CO2_reduction_sabatier	Vent Relief/Check #1	0.158663	0	0	0	0	1	0	0	0	0	0	0	0	0	0	0
Air	CO2_reduction_sabatier	Vent Relief/Check #2	0.158663	0	0	0	0	1	0	0	0	0	0	0	0	0	0	0
Air	CO2_reduction_sabatier	Vent Outlet NO Solenoid	0.951981	0	0	0	0	1	0	0	0	0	0	0	0	0	0	0
Air	CO2_reduction_sabatier	Water Pressure Sensor	0.818182	0	0	0	0	0	0	0.6	0	0.4	0	0	0	0	0	0
Air	CO2_reduction_sabatier	Water Relief	0.158663	0	0	0	0	1	0	0	0	0	0	0	0	0	0	0
Air	CO2_reduction_sabatier	Water Outlet NC Solenoid	0.47599	0	0	0	0	1	0	0	0	0	0	0	0	0	0	0
Air	CO2_reduction_sabatier	Rotary Water Separator Assembly	4.07236	0	22.8015	22.8015	0	1	0	0	0	0	0	0	0	0	0	0
Air	CO2_reduction_sabatier	Sabatier Reactor Assembly	2.53862	0	3.25736	3.25736	0	0.9	0	0.1	0	0	0	0	0	0	0	0
Air	CO2_reduction_sabatier	Structure (A/R)	9.22892	0	0	0	0	1	0	0	0	0	0	0	0	0	0	0
Air	CO2_reduction_sabatier	Miscellaneous Hardware (Clampts, bolts, etc.) (A/R)	1.77273	0	0	0	0	1	0	0	0	0	0	0	0	0	0	0
Air	CO2_reduction_sabatier	Air Cooling NC Solenoid	0.634654	0	0	0	0	1	0	0	0	0	0	0	0	0	0	0
Air	CO2_reduction_sabatier	Air Inlet Filter	0.110161	0	0	0	0	1	0	0	0	0	0	0	0	0	0	0
Air	CO2_reduction_sabatier	Air Sabatier Orifice	0.0528878	0	0	0	0	1	0	0	0	0	0	0	0	0	0	0
Air	CO2_reduction_sabatier	Heat Exchanger Inlet Duct	0.105776	0	0	0	0	1	0	0	0	0	0	0	0	0	0	0
Air	CO2_reduction_sabatier	Heat Exchanger Outlet Duct	0.105776	0	0	0	0	1	0	0	0	0	0	0	0	0	0	0
Air	CO2_reduction_sabatier	Reactor Inlet Duct	0.211551	0	0	0	0	1	0	0	0	0	0	0	0	0	0	0
Air	CO2_reduction_sabatier	Reactor Outlet Duct	0.105776	0	0	0	0	1	0	0	0	0	0	0	0	0	0	0
Air	CO2_reduction_sabatier	Tubing (A/R)	0.687542	0	0	0	0	1	0	0	0	0	0	0	0	0	0	0
Air	CO2_reduction_sabatier	Harnesses	11.4545	0	0	0	0	0.9	0.05	0	0.05	0	0	0	0	0	0	0
Air	CO2_reduction_sabatier	Valves & Sensors' total power	0	0	7.57358	7.57358	0	0	0	1	0	0	0	0	0	0	0	0
Air	CO2_reduction_sabatier	Mechanical Compressor ORU	19.0396	0	45.603	45.603	0	0.9	0.1	0	0	0	0	0	0	0	0	0.001
Air	CO2_reduction_sabatier	Compressor Manifold Assembly	4.65413	0	0	0	0	0.95	0.05	0	0	0	0	0	0	0	0	0
Air	CO2_reduction_sabatier	Controller Assembly	28.5909	0	55	55	0	0	0.2	0.8	0	0	0	0	0	0	0	0
Air	CO2_reduction_sabatier	CO2 Accumulator	10.1095	0.0119378	0	0	0	1	0	0	0	0	0	0	0	0	0	0
Air	OGS_ISS	Deionizing Bed ORU (Inlet)	8.00243	0.00981754	0	0	0	0.05	0.15	0	0	0	0	0	0	0	0	0.8
Air	OGS_ISS	Deionizing Bed ORU (Recirculating)	8.00243	0.00981754	0	0	0	0.05	0.15	0	0	0	0	0	0	0	0	0.8
Air	OGS_ISS	Oxygen/Water ORU	36.7163	0.024971	0	0	0	0.333333	0	0	0	0	0	0	0.333333	0	0.333333	0
Air	OGS_ISS	Pump ORU	6.51214	0.00603123	23.9574	23.9574	0	1	0	0	0	0	0	0	0	0	0	0
Air	OGS_ISS	Oxygen Phase Separator ORU	22.025	0.00549275	0	0	0	1	0	0	0	0	0	0	0	0	0	0
Air	OGS_ISS	Hydrogen ORU	96.297	0.0509896	31.6104	31.6104	0	1	0	0	0	0	0	0	0	0	0	0
Air	OGS_ISS	Hydrogen Sensor ORU	4.59	0.00344	0	0	0	1	0	0	0	0	0	0	0	0	0	0
Air	OGS_ISS	Process Controller	40.09	0.1359	148	148	0	0.3	0.001	0.7	0	0	0	0	0	0	0	0
Air	OGS_ISS	Power Supply Module (PSM)	13.8088	0.0215949	1098.05	549.023	0	0.7	0	0	0	0	0.1	0.1	0	0	0	0.1
Air	Fire_det_sup	Fire Detection Assembly	1.5	0.0028	1.48	1.48	0.887671	0.05	0.9	0.05	0	0	0	0	0	0	0	0
Air	Fire_det_sup	Portable Fire Extinguisher	6.8	0.0405	0	0	0	0.6	0	0	0	0	0	0	0.2	0	0	0.2
Air	ACO2R	Regenerator 1	45.3	0.17	397	397	0	0.98	0.01	0	0	0.01	0	0	0	0	0	0
Air	ACO2R	Metox Canisters	136	0.057	0	0	0	1	0	0	0	0	0	0	0	0	0	0
Air	TCCS_ISS	Activated charcoal bed	139.022	0.287061	0	0	0	0	0.5	0	0	0	0	0.5	0	0	0	0
Air	TCCS_ISS	Blower Assembly	2.48571	0.00488571	30.3929	30.3929	0	0.8	0	0.2	0	0	0	0	0	0	0	0
Air	TCCS_ISS	Flow Meter Assembly	1.1	0.0003	11.5	11.5	0	0.7	0.1	0.1	0	0.1	0	0	0	0	0	0
Air	TCCS_ISS	Catalytic Oxidizer Assembly	8.45714	0.0185143	92.1905	92.1905	0	1	0	0	0	0	0	0	0	0	0	0
Air	TCCS_ISS	LiOH Sorbent bed assembly	9.43169	0.0181732	0	0	0	0.07	0.03	0	0	0	0	0.9	0	0	0	0
Air	TCCS_ISS	Electrical interface assembly	4.5	0.00487	7.6	7.6	0	0	0	1	0	0	0	0	0	0	0	0
Waste	PMWC	Aluminum Compaction cylinder	9.41394	0.0234154	0	0	5400	1	0	0	0	0	0	0	0	0	0	0
Waste	PMWC	Band-type heating unit	0	0	162.293	0	0	0.9	0	0	0	0	0	0.1	0	0	0	0
Waste	PMWC	Commercial Lightweight, oil-less, compressor/vacuum pump	0	0	3.22283	0	0	0.9	0	0.1	0	0	0	0	0	0	0	0
Waste	PMWC	Temperature sensor	0.224	0	0	0	0	0	0	0.6	0	0.4	0	0	0	0	0	0
Waste	PMWC	Pressure sensor	0.304	0	0.33	0	0	0.1	0.25	0.65	0	0	0	0	0	0	0	0
Waste	PMWC	Housing & Mounting Equipment	23.8932	0.477865	0	0	0	1	0	0	0	0	0	0	0	0	0	0
Waste	PMWC	Condensing Heat Exchanger	2.85309	0.00566935	0	0	0	1	0	0	0	0	0	0	0	0	0	0
Waste	PMWC	Cooling system	0	0	144.887	144.887	0	1	0	0	0	0	0	0	0	0	0	0
Waste	Waste_storage	Low Density PolyEthylene Box	531.147	14.7541	0	0	0	0	1	0	0	0	0	0	0	0	0	0
Waste	Waste_collection_ISS	Commode/Urinal	58.4	0.3	0	0	887.671	0	1	0	0	0	0	0	0	0	0	0
Waste	Waste_collection_ISS	Fan	0	0	102	102	0	1	0	0	0	0	0	0	0	0	0	0
Waste	Waste_collection_ISS	Urine Separator	0	0	125	125	0	0.9	0	0.09	0.01	0	0	0	0	0	0	0
Waste	Waste_collection_ISS	Urine Vent Heater	0	0	14	14	0	1	0	0	0	0	0	0	0	0	0	0
Waste	Waste_collection_ISS	Fecal Bags	589.091	6.5772	0	0	0	0	0	0	1	0	0	0	0	0	0	0
Waste	Waste_collection_ISS	Wipes, Dry	196.364	2.6547	0	0	0	0	0	0	1	0	0	0	0	0	0	0
Waste	Waste_collection_ISS	Wipes, Wet	306.818	1.59282	0	0	0	0	0	0	0.6	0	0	0	0	0	0.4	0
Waste	Waste_collection_ISS	Wipes, Toilet Tissue	106.036	1.29467	0	0	0	0	0	0	0	0	0	0	0	0	0	1
Waste	Waste_collection_ISS	Gloves	167.891	0.764555	0	0	0	0	1	0	0	0	0	0	0	0	0	0
Waste	Waste_collection_ISS	Fecal Bags Odor Lids	883.636	8.262	0	0	0	0	1	0	0	0	0	0	0	0	0	0
Waste	Waste_collection_ISS	Fecal collection Canisters	1051.95	13.77	0	0	0	0	0.9	0	0.1	0	0	0	0	0	0	0
Waste	Waste_collection_ISS	Fecal collection Canisters lids	525.974	2.15229	0	0	0	0	1	0	0	0	0	0	0	0	0	0
Waste	Waste_collection_ISS	Urine Prefilters	920.455	5.0058	0	0	0	1	0	0	0	0	0	0	0	0	0	0
Waste	Waste_collection_ISS	Urine Filters	131.494	1.06226	0	0	0	0	0	0	1	0	0	0	0	0	0	0
Waste	Waste_collection_ISS	Urine Funnels	1.16364	0.006552	0	0	0	1	0	0	0	0	0	0	0	0	0	0
Waste	Waste_collection_ISS	Flush Water Transfer Bags	168.312	2.349	0	0	0	0	0.3	0	0.7	0	0	0	0	0	0	0
Waste	TCCS_ISS_2	Activated charcoal bed	278.043	0.574121	0	0	0	0	0.5	0	0	0	0	0	0	0	0	0.5
Waste	TCCS_ISS_2	Blower Assembly	4.97143	0.00977143	60.7857	60.7857	0	0.8	0	0.2	0	0	0	0	0	0	0	0
Waste	TCCS_ISS_2	Flow Meter Assembly	2.2	0.0006	23	23	0	0.7	0.1	0.1	0	0.1	0	0	0	0	0	0
Waste	TCCS_ISS_2	Catalytic Oxidizer Assembly	16.9143	0.0370286	184.381	184.381	0	1	0	0	0	0	0	0	0	0	0	0
Waste	TCCS_ISS_2	LiOH Sorbent bed assembly	18.8634	0.0363465	0	0	0	0.07	0.03	0	0	0	0	0.9	0	0	0	0
Waste	TCCS_ISS_2	Electrical interface assembly	9	0.00974	15.2	15.2	0	0	0	1	0	0	0	0	0	0	0	0
Water	VCD_ISS	MLS Filter ORU	118.208	0.165849	0	0	0	0.5	0	0.5	0	0	0	0	0	0	0	0
Water	VCD_ISS	Particulate Filter ORU	612.481	1.55746	0	0	0	0.9	0	0	0	0	0	0	0	0	0	0.1
Water	VCD_ISS	Multifiltration Bed #1 & #2 ORUs	5001.86	6.51381	0	0	0	0.07	0.03	0	0	0	0	0	0	0	0.9	0
Water	VCD_ISS	Sensor ORU	3.64	0.0093	2.13	2.13	0	0	0.6	0.2	0	0.2	0	0	0	0	0	0
Water	VCD_ISS	Piping	0.737628	0.00100391	0	0	0	1	0	0	0	0	0	0	0	0	0	0
Water	VCD_ISS	Pump/MLS ORU	18.3802	0.0576542	19.4985	19.4985	0	0.5	0	0.5	0	0	0	0	0	0	0	0
Water	VCD_ISS	Catalytic Reactor & Preheeater ORU	0	0	107.253	107.253	0	1	0	0	0	0	0	0	0	0	0	0
Water	VCD_ISS	Oxygen Filter	0	0	0	0	0	0.5	0.5	0	0	0	0	0	0	0	0	0
Water	VCD_ISS	Microbial Check Valve	5.12427	0.00892969	0	0	0	0.99	0	0	0	0	0	0	0	0	0	0.01
Water	Potable_water_tank	Gas Separator ORU	26.1738	0.0570557	50.4266	50.4266	0	0.9	0.1	0	0	0	0	0	0	0	0	0.001
Water	Potable_water_tank	Hygiene H2O Tank	58.2194	0.108459	4.70696	4.70696	0	0	1	0	0	0	0	0	0	0	0	0
Water	WRS	Product H2O Tank	32.7638	0.116372	5.24037	5.24037	0	0	1	0	0	0	0	0	0	0	0	0
Water	WRS	Process Controller	36.91	0.0838	156.18	156.18	0	0.3	0.001	0.7	0	0	0	0	0	0	0	0
Water	WRS	Reactor Health Sensor	8.64	0.0422	4.72	4.72	0	0.1	0.2	0.6	0	0	0	0.1	0	0	0	0
Water	WRS	H2O Delivery System	26.0873	0.0647695	1.92459	1.92459	0	0.9	0	0	0	0	0.1	0	0	0	0	0
Water	WRS	Ion Exchange Bed	83.0212	0.112991	0	0	0	0.07	0.03	0	0	0	0	0	0	0	0.9	0
Water	WRS	Pressure Control & Pump (PCPA)	33.5966	0.0547461	9.74652	9.74652	0	0.7	0.2	0.1	0	0	0	0	0	0	0	0
Water	WRS	Fluid Control & Pump (FCPA)	34.2107	0.0542967	14.1371	14.1371	0	0.7	0.2	0.1	0	0	0	0	0	0	0	0
Water	WRS	Recycle Filter Tank (RFTA)	14.2969	0.076315	0	0	0	0	1	0	0	0	0	0	0	0	0	0
Water	WRS	Wastewater Storage Tank Assembly (WSTA)	35.8433	0.0307806	0.139568	0.139568	0	1	0	0	0	0	0	0	0	0	0	0
Water	WRS	Distillation Assembly (DA)	56.7158	0.113237	135.079	135.079	0	0.6	0	0.1	0	0.3	0	0	0	0	0	0
Water	WRS	Separator Plumbing Assembly (SPA)	12.2224	0.0186481	0	0	0	0.99	0.01	0	0	0	0	0	0	0	0	0
Water	WRS	Power Module (Included in FCA)	0	0	0	0	0	0	0	0	0	0	0	0	0	0	0	0
Water	WRS	Firmware Controller Assembly (Data module, power module)	24.09	0.0286	150.09	150.09	0	0.8	0	0.2	0	0	0	0	0	0	0	0
Water	WRS	Piping	9.34428	0.0174012	0	0	0	1	0	0	0	0	0	0	0	0	0	0
Water	Volatile_removal_assembly	Catalytic Reactor & Preheeater ORU	0	0	90.481	90.481	0	1	0	0	0	0	0	0	0	0	0	0
Water	Volatile_removal_assembly	Gas Separator ORU	24.5428	0.0535004	42.5412	42.5412	0	0.9	0.1	0	0	0	0	0	0	0	0	0.001
Water	Volatile_removal_assembly	Oxygen Filter	0	0	0	0	0	0.5	0.5	0	0	0	0	0	0	0	0	0
Water	Volatile_removal_assembly	Piping	1.26268	0.00267502	0	0	0	1	0	0	0	0	0	0	0	0	0	0
Water	WRS	Product H2O Tank	937.434	3.32963	116.48	116.48	0	0	1	0	0	0	0	0	0	0	0	0
Water	WRS	H2O Stored	2897.03	0	0	0	0	0	0	0	0	0	0	0	0	0	1	0
Food	Stored_food	Packaging	29004.8	0	0	0	0	0.01	0.99	0	0	0	0	0	0	0	0	0
Food	Food_storage	Storage	7112.33	99.2418	0	0	0	0.25	0.25	0	0	0	0	0	0	0.5	0	0
Food	Food_processing	Rehydration Unit and Conduction Oven	36.3	0.094	10	10	0	0.7	0.05	0.25	0	0	0	0	0	0	0	0
Thermal	CCAA	Inlet ORU	0	0	298.999	298.999	0	1	0	0	0	0	0	0	0	0	0	0
Thermal	CCAA	Condensing heat exchanger	34.8864	0.0691961	0	0	0	1	0	0	0	0	0	0	0	0	0	0
Thermal	CCAA	Water separator	5.30213	0.0365802	3.34085	3.34085	0	0.99	0	0	0	0	0	0	0	0	0	0.01
Thermal	CCAA	Temp. Control & Check Valve	3.88703	0.02638	0.0598559	0.0598559	0	0.8	0.15	0	0.05	0	0	0	0	0	0	0
Thermal	CCAA	Electrical Interface Box (EIB)	4.1	0.0113	8	8	0	0.9	0	0.1	0	0	0	0	0	0	0	0
Thermal	CCAA	Temp. Sensor	0.24	0.0006	0.01	0.01	0	0	0	0.6	0	0.4	0	0	0	0	0	0
Thermal	CCAA	Liquid Sensor	0.47	0.0006	0.01	0.01	0	0	0.5	0.5	0	0	0	0	0	0	0	0
Thermal	CCAA	Fan Delta P Sensor	0.4	0.00024	0.2	0.2	0	0.9	0	0.1	0	0	0	0	0	0	0	0
Thermal	CCAA	Pressure Sensor	0.3	6e-05	0.2	0.2	0	0.1	0.25	0.65	0	0	0	0	0	0	0	0
Thermal	AMC	HEPA Filter Element	49.22	0.1886	0	0	29.589	0.7	0	0	0	0.3	0	0	0	0	0	0
Thermal	AMC	Catalytic Filter element	54	0.082	0	0	0	0	0.7	0	0.3	0	0	0	0	0	0	0
Thermal	AC	IMV Fan	4.77	0.0093	55	55	0	0.9	0.05	0	0.05	0	0	0	0	0	0	0
Thermal	AC	IMV Valve	5.1	0.0099	6	6	0	1	0	0	0	0	0	0	0	0	0	0
Thermal	AAA	Avionics Air Assembly	12.4	0.034	175	175	0	0.8	0.1	0	0.1	0	0	0	0	0	0	0
Thermal	ITCS	ITCS	217.231	0.363729	2669.94	2669.94	0	0.9	0	0.1	0	0	0	0	0	0	0	0

## Sheet: Composition
System	Subsystem	Item	fraction Structural Metal	fraction Plastic	fraction Electronics	fraction Fabric	fraction Glass	fraction Rubber	fraction Ceramics	fraction Gas	fraction biomass	fraction Water	fraction Other
Air	APC	Vent/Relief Valve	1	0	0	0	0	0	0	0	0	0	0
Air	APC	Pressure control panel	0.2	0.1	0.7	0	0	0	0	0	0	0	0
Air	APC	Manual Pressure Equalization Valve	1	0	0	0	0	0	0	0	0	0	0
Air	APC	Positive Pressure Relief Valve	1	0	0	0	0	0	0	0	0	0	0
Air	APC	Negative Pressure Relief Valve	1	0	0	0	0	0	0	0	0	0	0
Air	APC	Nitrogen Interface Assembly	1	0	0	0	0	0	0	0	0	0	0
Air	APC	Vacuum Access Jumper 5-ft	0	0	1	0	0	0	0	0	0	0	0
Air	APC	Vacuum Access Jumper 35-ft	0	0	1	0	0	0	0	0	0	0	0
Air	ACMA	Verification Gas Assembly	0.5	0	0	0	0	0	0	0.5	0	0	0
Air	ACMA	Mass Spectrometer	0.5	0	0.5	0	0	0	0	0	0	0	0
Air	ACMA	Sample Pump	1	0	0	0	0	0	0	0	0	0	0
Air	ACMA	Sample Distributor	0.95	0	0	0.05	0	0	0	0	0	0	0
Air	ACMA	Data & Control	0.5	0	0.5	0	0	0	0	0	0	0	0
Air	ACMA	Low Volt. Power supply	0.7	0	0	0	0	0.1	0.1	0	0	0	0.1
Air	ACMA	Chassis	1	0	0	0	0	0	0	0	0	0	0
Air	ACMA	Inlet Valve Assembly	0.9	0	0	0.01	0	0	0	0	0	0.09	0
Air	ACMA	EMI Filter	0.98	0.02	0	0	0	0	0	0	0	0	0
Air	SDS	3-way solenoid valves	1	0	0	0	0	0	0	0	0	0	0
Air	SDS	Manual valves	1	0	0	0	0	0	0	0	0	0	0
Air	SDS	Sample probes	1	0	0	0	0	0	0	0	0	0	0
Air	CO2_removal_4BMS	Air Selector Valve	0.9	0	0	0	0	0	0	0.1	0	0	0
Air	CO2_removal_4BMS	Desiccant Bed	0.4	0	0	0	0	0	0.6	0	0	0	0
Air	CO2_removal_4BMS	Adsorbent Bed	0.5	0	0	0.2	0	0	0.3	0	0	0	0
Air	CO2_removal_4BMS	Air Check Valve	1	0	0	0	0	0	0	0	0	0	0
Air	CO2_removal_4BMS	Heater Controller	0.8	0	0.2	0	0	0	0	0	0	0	0
Air	CO2_removal_4BMS	Air Blower	1	0	0	0	0	0	0	0	0	0	0
Air	CO2_removal_4BMS	Precooler	1	0	0	0	0	0	0	0	0	0	0
Air	CO2_removal_4BMS	Blower/precooler Motor Controller	0.6	0	0.4	0	0	0	0	0	0	0	0
Air	CO2_removal_4BMS	CO2 Pump	0.99	0	0	0	0	0	0	0	0	0	0.01
Air	CO2_removal_4BMS	CO2 Pump Motor Controller	0.3	0	0.7	0	0	0	0	0	0	0	0
Air	CO2_removal_4BMS	Temperature Sensor	0	0	0.6	0	0.4	0	0	0	0	0	0
Air	CO2_removal_4BMS	Differential Pressure Sensor	0.1	0.25	0.65	0	0	0	0	0	0	0	0
Air	CO2_removal_4BMS	Absolute Pressure Sensor	0.75	0	0	0	0	0	0.25	0	0	0	0
Air	CO2_removal_4BMS	Electrical Harness	0.9	0.05	0	0.05	0	0	0	0	0	0	0
Air	CO2_removal_4BMS	Plumbing	1	0	0	0	0	0	0	0	0	0	0
Air	CO2_removal_4BMS	Support Structure	1	0	0	0	0	0	0	0	0	0	0
Air	CO2_removal_4BMS	Fluid Disconnects	1	0	0	0	0	0	0	0	0	0	0
Air	CO2_removal_4BMS	Electronics coldplate	1	0	0	0	0	0	0	0	0	0	0
Air	CO2_removal_4BMS	Electronics Interface Plate	1	0	0	0	0	0	0	0	0	0	0
Air	N2_storage	MD Shield Instl	1	0	0	0	0	0	0	0	0	0	0
Air	N2_storage	Multilayer Insulation Assembly-T #1	1	0	0	0	0	0	0	0	0	0	0
Air	N2_storage	Multilayer Insulation Assembly-T #2	1	0	0	0	0	0	0	0	0	0	0
Air	N2_storage	Primary Structure Assembly -HPG ORU	0.5	0	0	0	0	0	0	0.5	0	0	0
Air	N2_storage	Tank ORU Assembly	1	0	0	0	0	0	0	0	0	0	0
Air	N2_storage	Utilities Installation - O2/N2 Tank	0.5	0	0	0	0	0	0	0.5	0	0	0
Air	N2_storage	N2 Bare Tank	0.9	0	0	0	0	0.05	0	0.05	0	0	0
Air	N2_storage	HPGA Fluid	0	0	0	0	0	0	0	0	0	1	0
Air	N2_storage	Handhold, top mounted	0	1	0	0	0	0	0	0	0	0	0
Air	N2_storage	Handrail 21.941 in custom	0	1	0	0	0	0	0	0	0	0	0
Air	N2_storage	Handrail, top mounted	0	1	0	0	0	0	0	0	0	0	0
Air	N2_storage	Grapple fixture, flt releasable	0.5	0	0.5	0	0	0	0	0	0	0	0
Air	N2_storage	Accessories	0	0	0	0	0	0	0	0	0	0	0
Air	O2_storage	MD Shield Instl	1	0	0	0	0	0	0	0	0	0	0
Air	O2_storage	Multilayer Insulation Assembly-T #1	1	0	0	0	0	0	0	0	0	0	0
Air	O2_storage	Multilayer Insulation Assembly-T #2	1	0	0	0	0	0	0	0	0	0	0
Air	O2_storage	Primary Structure Assembly -HPG ORU	0.5	0	0	0	0	0	0	0.5	0	0	0
Air	O2_storage	Tank ORU Assembly	1	0	0	0	0	0	0	0	0	0	0
Air	O2_storage	Utilities Installation - O2/N2 Tank	0.5	0	0	0	0	0	0	0.5	0	0	0
Air	O2_storage	O2 Bare Tank	0.95	0	0	0	0	0	0	0.05	0	0	0
Air	O2_storage	HPGA Fluid	0	0	0	0	0	0	0	0	0	1	0
Air	O2_storage	Handhold, top mounted	0	1	0	0	0	0	0	0	0	0	0
Air	O2_storage	Handrail 21.941 in custom	0	1	0	0	0	0	0	0	0	0	0
Air	O2_storage	Handrail, top mounted	0	1	0	0	0	0	0	0	0	0	0
Air	O2_storage	Grapple fixture, flt releasable	0.5	0	0.5	0	0	0	0	0	0	0	0
Air	O2_storage	Accessories	0	0	0	0	0	0	0	0	0	0	0
Air	CO2_reduction_sabatier	Condensing Heat Exchanger	0.9	0	0.1	0	0	0	0	0	0	0	0
Air	CO2_reduction_sabatier	AAA heat exchanger	1	0	0	0	0	0	0	0	0	0	0
Air	CO2_reduction_sabatier	ITCS Coolant Water Inlet QD	1	0	0	0	0	0	0	0	0	0	0
Air	CO2_reduction_sabatier	ITCS Coolant Water Outlet QD	1	0	0	0	0	0	0	0	0	0	0
Air	CO2_reduction_sabatier	Heat Exchanger Inlet Temp	1	0	0	0	0	0	0	0	0	0	0
Air	CO2_reduction_sabatier	Heat Exchanger Outlet Temp	1	0	0	0	0	0	0	0	0	0	0
Air	CO2_reduction_sabatier	Manifold, CO2	0.95	0.05	0	0	0	0	0	0	0	0	0
Air	CO2_reduction_sabatier	CO2 Inlet Check Valve	0.9	0.1	0	0	0	0	0	0	0	0	0
Air	CO2_reduction_sabatier	CO2 Inlet Filter	1	0	0	0	0	0	0	0	0	0	0
Air	CO2_reduction_sabatier	Pressure sensor, CO2 Inlet	0	0	0.6	0	0.4	0	0	0	0	0	0
Air	CO2_reduction_sabatier	CO2 Inlet QD	1	0	0	0	0	0	0	0	0	0	0
Air	CO2_reduction_sabatier	CO2 Inlet Regulator	0.9	0.05	0	0	0.05	0	0	0	0	0	0
Air	CO2_reduction_sabatier	CO2 Inlet NC Solenoid	1	0	0	0	0	0	0	0	0	0	0
Air	CO2_reduction_sabatier	CO2 Inlet Flow Control	0.85	0.05	0	0	0.1	0	0	0	0	0	0
Air	CO2_reduction_sabatier	CO2 Flow Control Orifice	1	0	0	0	0	0	0	0	0	0	0
Air	CO2_reduction_sabatier	Delta P Sensor, Flow Sensor CO2	0	0	0.6	0	0.4	0	0	0	0	0	0
Air	CO2_reduction_sabatier	CO2 Flow Meter Orifice	1	0	0	0	0	0	0	0	0	0	0
Air	CO2_reduction_sabatier	Manifold, Hydrogen	0.95	0.05	0	0	0	0	0	0	0	0	0
Air	CO2_reduction_sabatier	Water Outlet Quick Disconnect	1	0	0	0	0	0	0	0	0	0	0
Air	CO2_reduction_sabatier	Hydrogen Inlet Check Valve	0.9	0.1	0	0	0	0	0	0	0	0	0
Air	CO2_reduction_sabatier	Hydrogen Inlet Filter	1	0	0	0	0	0	0	0	0	0	0
Air	CO2_reduction_sabatier	H2O Outlet Pressure Sensor	0	0	0.6	0	0.4	0	0	0	0	0	0
Air	CO2_reduction_sabatier	Hydrogen Inlet Quick Disconnect	1	0	0	0	0	0	0	0	0	0	0
Air	CO2_reduction_sabatier	Hydrogen Inlet NC Solenoid	1	0	0	0	0	0	0	0	0	0	0
Air	CO2_reduction_sabatier	Delta P Sensor, Flow Sensor H2	0	0	0.6	0	0.4	0	0	0	0	0	0
Air	CO2_reduction_sabatier	H2 Flow Meter Orifice	1	0	0	0	0	0	0	0	0	0	0
Air	CO2_reduction_sabatier	Manifold, Vent	0.95	0.05	0	0	0	0	0	0	0	0	0
Air	CO2_reduction_sabatier	Liquid Sensor	0	0.5	0.5	0	0	0	0	0	0	0	0
Air	CO2_reduction_sabatier	Vent Pressure Sensor	0	0	0.6	0	0.4	0	0	0	0	0	0
Air	CO2_reduction_sabatier	Vent Outlet Quick Disconnect	1	0	0	0	0	0	0	0	0	0	0
Air	CO2_reduction_sabatier	Vent Regulator	0.9	0.05	0	0	0.05	0	0	0	0	0	0
Air	CO2_reduction_sabatier	Vent Relief/Check #1	1	0	0	0	0	0	0	0	0	0	0
Air	CO2_reduction_sabatier	Vent Relief/Check #2	1	0	0	0	0	0	0	0	0	0	0
Air	CO2_reduction_sabatier	Vent Outlet NO Solenoid	1	0	0	0	0	0	0	0	0	0	0
Air	CO2_reduction_sabatier	Water Pressure Sensor	0	0	0.6	0	0.4	0	0	0	0	0	0
Air	CO2_reduction_sabatier	Water Relief	1	0	0	0	0	0	0	0	0	0	0
Air	CO2_reduction_sabatier	Water Outlet NC Solenoid	1	0	0	0	0	0	0	0	0	0	0
Air	CO2_reduction_sabatier	Rotary Water Separator Assembly	1	0	0	0	0	0	0	0	0	0	0
Air	CO2_reduction_sabatier	Sabatier Reactor Assembly	0.9	0	0.1	0	0	0	0	0	0	0	0
Air	CO2_reduction_sabatier	Structure (A/R)	1	0	0	0	0	0	0	0	0	0	0
Air	CO2_reduction_sabatier	Miscellaneous Hardware (Clampts, bolts, etc.) (A/R)	1	0	0	0	0	0	0	0	0	0	0
Air	CO2_reduction_sabatier	Air Cooling NC Solenoid	1	0	0	0	0	0	0	0	0	0	0
Air	CO2_reduction_sabatier	Air Inlet Filter	1	0	0	0	0	0	0	0	0	0	0
Air	CO2_reduction_sabatier	Air Sabatier Orifice	1	0	0	0	0	0	0	0	0	0	0
Air	CO2_reduction_sabatier	Heat Exchanger Inlet Duct	1	0	0	0	0	0	0	0	0	0	0
Air	CO2_reduction_sabatier	Heat Exchanger Outlet Duct	1	0	0	0	0	0	0	0	0	0	0
Air	CO2_reduction_sabatier	Reactor Inlet Duct	1	0	0	0	0	0	0	0	0	0	0
Air	CO2_reduction_sabatier	Reactor Outlet Duct	1	0	0	0	0	0	0	0	0	0	0
Air	CO2_reduction_sabatier	Tubing (A/R)	1	0	0	0	0	0	0	0	0	0	0
Air	CO2_reduction_sabatier	Harnesses	0.9	0.05	0	0.05	0	0	0	0	0	0	0
Air	CO2_reduction_sabatier	Valves & Sensors' total power	0	0	1	0	0	0	0	0	0	0	0
Air	CO2_reduction_sabatier	Mechanical Compressor ORU	0.9	0.1	0	0	0	0	0	0	0	0	0.001
Air	CO2_reduction_sabatier	Compressor Manifold Assembly	0.95	0.05	0	0	0	0	0	0	0	0	0
Air	CO2_reduction_sabatier	Controller Assembly	0	0.2	0.8	0	0	0	0	0	0	0	0
Air	CO2_reduction_sabatier	CO2 Accumulator	1	0	0	0	0	0	0	0	0	0	0
Air	O2_generation_ISS	Deionizing Bed ORU (Inlet)	0.05	0.15	0	0	0	0	0	0	0	0	0.8
Air	O2_generation_ISS	Deionizing Bed ORU (Recirculating)	0.05	0.15	0	0	0	0	0	0	0	0	0.8
Air	O2_generation_ISS	Oxygen/Water ORU	0.333333	0	0	0	0	0	0	0.333333	0	0.333333	0
Air	O2_generation_ISS	Pump ORU	1	0	0	0	0	0	0	0	0	0	0
Air	O2_generation_ISS	Oxygen Phase Separator ORU	1	0	0	0	0	0	0	0	0	0	0
Air	O2_generation_ISS	Hydrogen ORU	1	0	0	0	0	0	0	0	0	0	0
Air	O2_generation_ISS	Hydrogen Sensor ORU	1	0	0	0	0	0	0	0	0	0	0
Air	O2_generation_ISS	Process Controller	0.3	0.001	0.7	0	0	0	0	0	0	0	0
Air	O2_generation_ISS	Power Supply Module (PSM)	0.7	0	0	0	0	0.1	0.1	0	0	0	0.1
Air	Fire_det_sup	Fire Detection Assembly	0.05	0.9	0.05	0	0	0	0	0	0	0	0
Air	Fire_det_sup	Portable Fire Extinguisher	0.6	0	0	0	0	0	0	0.2	0	0	0.2
Air	ACO2R	Regenerator 1	0.98	0.01	0	0	0.01	0	0	0	0	0	0
Air	ACO2R	Metox Canisters	1	0	0	0	0	0	0	0	0	0	0
Air	TCCS_ISS	Activated charcoal bed	0	0.5	0	0	0	0	0.5	0	0	0	0
Air	TCCS_ISS	Blower Assembly	0.8	0	0.2	0	0	0	0	0	0	0	0
Air	TCCS_ISS	Flow Meter Assembly	0.7	0.1	0.1	0	0.1	0	0	0	0	0	0
Air	TCCS_ISS	Catalytic Oxidizer Assembly	1	0	0	0	0	0	0	0	0	0	0
Air	TCCS_ISS	LiOH Sorbent bed assembly	0.07	0.03	0	0	0	0	0.9	0	0	0	0
Air	TCCS_ISS	Electrical interface assembly	0	0	1	0	0	0	0	0	0	0	0
Waste	PMWC	Aluminum Compaction cylinder	1	0	0	0	0	0	0	0	0	0	0
Waste	PMWC	Band-type heating unit	0.9	0	0	0	0	0	0.1	0	0	0	0
Waste	PMWC	Commercial Lightweight, oil-less, compressor/vacuum pump	0.9	0	0.1	0	0	0	0	0	0	0	0
Waste	PMWC	Temperature sensor	0	0	0.6	0	0.4	0	0	0	0	0	0
Waste	PMWC	Pressure sensor	0.1	0.25	0.65	0	0	0	0	0	0	0	0
Waste	PMWC	Housing & Mounting Equipment	1	0	0	0	0	0	0	0	0	0	0
Waste	PMWC	Condensing Heat Exchanger	1	0	0	0	0	0	0	0	0	0	0
Waste	PMWC	Cooling system	1	0	0	0	0	0	0	0	0	0	0
Waste	Waste_storage	Low Density PolyEthylene Box	0	1	0	0	0	0	0	0	0	0	0
Waste	Waste_collection_ISS	Commode/Urinal	0	1	0	0	0	0	0	0	0	0	0
Waste	Waste_collection_ISS	Fan	1	0	0	0	0	0	0	0	0	0	0
Waste	Waste_collection_ISS	Urine Separator	0.9	0	0.09	0.01	0	0	0	0	0	0	0
Waste	Waste_collection_ISS	Urine Vent Heater	1	0	0	0	0	0	0	0	0	0	0
Waste	Waste_collection_ISS	Fecal Bags	0	0	0	1	0	0	0	0	0	0	0
Waste	Waste_collection_ISS	Wipes, Dry	0	0	0	1	0	0	0	0	0	0	0
Waste	Waste_collection_ISS	Wipes, Wet	0	0	0	0.6	0	0	0	0	0	0.4	0
Waste	Waste_collection_ISS	Wipes, Toilet Tissue	0	0	0	0	0	0	0	0	0	0	1
Waste	Waste_collection_ISS	Gloves	0	1	0	0	0	0	0	0	0	0	0
Waste	Waste_collection_ISS	Fecal Bags Odor Lids	0	1	0	0	0	0	0	0	0	0	0
Waste	Waste_collection_ISS	Fecal collection Canisters	0	0.9	0	0.1	0	0	0	0	0	0	0
Waste	Waste_collection_ISS	Fecal collection Canisters lids	0	1	0	0	0	0	0	0	0	0	0
Waste	Waste_collection_ISS	Urine Prefilters	1	0	0	0	0	0	0	0	0	0	0
Waste	Waste_collection_ISS	Urine Filters	0	0	0	1	0	0	0	0	0	0	0
Waste	Waste_collection_ISS	Urine Funnels	1	0	0	0	0	0	0	0	0	0	0
Waste	Waste_collection_ISS	Flush Water Transfer Bags	0	0.3	0	0.7	0	0	0	0	0	0	0
Waste	TCCS_ISS_x3	Activated charcoal bed	0	0.5	0	0	0	0	0	0	0	0	0.5
Waste	TCCS_ISS_x4	Blower Assembly	0.8	0	0.2	0	0	0	0	0	0	0	0
Waste	TCCS_ISS_x5	Flow Meter Assembly	0.7	0.1	0.1	0	0.1	0	0	0	0	0	0
Waste	TCCS_ISS_x6	Catalytic Oxidizer Assembly	1	0	0	0	0	0	0	0	0	0	0
Waste	TCCS_ISS_x7	LiOH Sorbent bed assembly	0.07	0.03	0	0	0	0	0.9	0	0	0	0
Waste	TCCS_ISS_x8	Electrical interface assembly	0	0	1	0	0	0	0	0	0	0	0
Water	Water_recovery_system	MLS Filter ORU	0.5	0	0.5	0	0	0	0	0	0	0	0
Water	Water_recovery_system	Particulate Filter ORU	0.9	0	0	0	0	0	0	0	0	0	0.1
Water	Water_recovery_system	Multifiltration Bed #1 & #2 ORUs	0.07	0.03	0	0	0	0	0	0	0	0.9	0
Water	Water_recovery_system	Sensor ORU	0	0.6	0.2	0	0.2	0	0	0	0	0	0
Water	Water_recovery_system	Piping	1	0	0	0	0	0	0	0	0	0	0
Water	Water_recovery_system	Pump/MLS ORU	0.5	0	0.5	0	0	0	0	0	0	0	0
Water	Water_recovery_system	Catalytic Reactor & Preheeater ORU	1	0	0	0	0	0	0	0	0	0	0
Water	Water_recovery_system	Oxygen Filter	0.5	0.5	0	0	0	0	0	0	0	0	0
Water	Water_recovery_system	Microbial Check Valve	0.99	0	0	0	0	0	0	0	0	0	0.01
Water	Water_recovery_system	Gas Separator ORU	0.9	0.1	0	0	0	0	0	0	0	0	0.001
Water	Water_recovery_system	Hygiene H2O Tank	0	1	0	0	0	0	0	0	0	0	0
Water	Water_recovery_system	Product H2O Tank	0	1	0	0	0	0	0	0	0	0	0
Water	Water_recovery_system	Process Controller	0.3	0.001	0.7	0	0	0	0	0	0	0	0
Water	Water_recovery_system	Reactor Health Sensor	0.1	0.2	0.6	0	0	0	0.1	0	0	0	0
Water	Water_recovery_system	H2O Delivery System	0.9	0	0	0	0	0.1	0	0	0	0	0
Water	Urinary_primary_processing_ISS	Pressure Control & Pump (PCPA)	0.7	0.2	0.1	0	0	0	0	0	0	0	0
Water	Urinary_primary_processing_ISS	Fluid Control & Pump (FCPA)	0.7	0.2	0.1	0	0	0	0	0	0	0	0
Water	Urinary_primary_processing_ISS	Recycle Filter Tank (RFTA)	0	1	0	0	0	0	0	0	0	0	0
Water	Urinary_primary_processing_ISS	Wastewater Storage Tank Assembly (WSTA)	1	0	0	0	0	0	0	0	0	0	0
Water	Urinary_primary_processing_ISS	Distillation Assembly (DA)	0.6	0	0.1	0	0.3	0	0	0	0	0	0
Water	Urinary_primary_processing_ISS	Separator Plumbing Assembly (SPA)	0.99	0.01	0	0	0	0	0	0	0	0	0
Water	Urinary_primary_processing_ISS	Power Module (Included in FCA)	0	0	0	0	0	0	0	0	0	0	0
Water	Urinary_primary_processing_ISS	Firmware Controller Assembly (Data module, power module)	0.8	0	0.2	0	0	0	0	0	0	0	0
Water	Urinary_primary_processing_ISS	Piping	1	0	0	0	0	0	0	0	0	0	0
Water	Volatile_removal_assembly	Catalytic Reactor & Preheeater ORU	1	0	0	0	0	0	0	0	0	0	0
Water	Volatile_removal_assembly	Gas Separator ORU	0.9	0.1	0	0	0	0	0	0	0	0	0.001
Water	Volatile_removal_assembly	Oxygen Filter	0.5	0.5	0	0	0	0	0	0	0	0	0
Water	Volatile_removal_assembly	Piping	1	0	0	0	0	0	0	0	0	0	0
Water	Potable_water_tank	Product H2O Tank	0	1	0	0	0	0	0	0	0	0	0
Water	Potable_water_tank	H2O Stored	0	0	0	0	0	0	0	0	0	1	0
Food	Food_storage	Lockers	0.25	0.25	0	0	0	0	0	0	0.5	0	0
Food	Food_processing	Rehydration Unit and Conduction Oven	0.7	0.05	0.25	0	0	0	0	0	0	0	0
Thermal	CCAA	Inlet ORU	1	0	0	0	0	0	0	0	0	0	0
Thermal	CCAA	Condensing heat exchanger	1	0	0	0	0	0	0	0	0	0	0
Thermal	CCAA	Water separator	0.99	0	0	0	0	0	0	0	0	0	0.01
Thermal	CCAA	Temp. Control & Check Valve	0.8	0.15	0	0.05	0	0	0	0	0	0	0
Thermal	CCAA	Electrical Interface Box (EIB)	0.9	0	0.1	0	0	0	0	0	0	0	0
Thermal	CCAA	Temp. Sensor	0	0	0.6	0	0.4	0	0	0	0	0	0
Thermal	CCAA	Liquid Sensor	0	0.5	0.5	0	0	0	0	0	0	0	0
Thermal	CCAA	Fan Delta P Sensor	0.9	0	0.1	0	0	0	0	0	0	0	0
Thermal	CCAA	Pressure Sensor	0.1	0.25	0.65	0	0	0	0	0	0	0	0
Thermal	Atmosphere_microbial_control	HEPA Filter Element	0.7	0	0	0	0.3	0	0	0	0	0	0
Thermal	Atmosphere_microbial_control	Catalytic Filter element	0	0.7	0	0.3	0	0	0	0	0	0	0
Thermal	Atmosphere_circulation	IMV Fan	0.9	0.05	0	0.05	0	0	0	0	0	0	0
Thermal	Atmosphere_circulation	IMV Valve	1	0	0	0	0	0	0	0	0	0	0
Thermal	AAA	Avionics Air Assembly	0.8	0.1	0	0.1	0	0	0	0	0	0	0

## Sheet: Sheet2
Item	System	Subsystem	Davey 5400d				Davey 540d				Davey 180d			540=mine? Item
Vent/Relief Valve	Air	APC	Air	APC	Vent/Relief Valve		Air	APC	Vent/Relief Valve		Air	APC	Vent/Relief Valve	1
Pressure control panel	Air	APC	Air	APC	Pressure control panel		Air	APC	Pressure control panel		Air	APC	Pressure control panel	1
Manual Pressure Equalization Valve	Air	APC	Air	APC	Manual Pressure Equalization Valve		Air	APC	Manual Pressure Equalization Valve		Air	APC	Manual Pressure Equalization Valve	1
Positive Pressure Relief Valve	Air	APC	Air	APC	Positive Pressure Relief Valve		Air	APC	Positive Pressure Relief Valve		Air	APC	Positive Pressure Relief Valve	1
Negative Pressure Relief Valve	Air	APC	Air	APC	Negative Pressure Relief Valve		Air	APC	Negative Pressure Relief Valve		Air	APC	Negative Pressure Relief Valve	1
Nitrogen Interface Assembly	Air	APC	Air	APC	Nitrogen Interface Assembly		Air	APC	Nitrogen Interface Assembly		Air	APC	Nitrogen Interface Assembly	1
Vacuum Access Jumper 5-ft	Air	APC	Air	APC	Vacuum Access Jumper 5-ft		Air	APC	Vacuum Access Jumper 5-ft		Air	APC	Vacuum Access Jumper 5-ft	1
Vacuum Access Jumper 35-ft	Air	APC	Air	APC	Vacuum Access Jumper 35-ft		Air	APC	Vacuum Access Jumper 35-ft		Air	APC	Vacuum Access Jumper 35-ft	1
Verification Gas Assembly	Air	ACMA	Air	ACMA	Verification Gas Assembly		Air	ACMA	Verification Gas Assembly		Air	ACMA	Verification Gas Assembly	1
Mass Spectrometer	Air	ACMA	Air	ACMA	Mass Spectrometer		Air	ACMA	Mass Spectrometer		Air	ACMA	Mass Spectrometer	1
Sample Pump	Air	ACMA	Air	ACMA	Sample Pump		Air	ACMA	Sample Pump		Air	ACMA	Sample Pump	1
Sample Distributor	Air	ACMA	Air	ACMA	Sample Distributor		Air	ACMA	Sample Distributor		Air	ACMA	Sample Distributor	1
Data & Control	Air	ACMA	Air	ACMA	Data & Control		Air	ACMA	Data & Control		Air	ACMA	Data & Control	1
Low Volt. Power supply	Air	ACMA	Air	ACMA	Low Volt. Power supply		Air	ACMA	Low Volt. Power supply		Air	ACMA	Low Volt. Power supply	1
Chassis	Air	ACMA	Air	ACMA	Chassis		Air	ACMA	Chassis		Air	ACMA	Chassis	1
Inlet Valve Assembly	Air	ACMA	Air	ACMA	Inlet Valve Assembly		Air	ACMA	Inlet Valve Assembly		Air	ACMA	Inlet Valve Assembly	1
EMI Filter	Air	ACMA	Air	ACMA	EMI Filter		Air	ACMA	EMI Filter		Air	ACMA	EMI Filter	1
3-way solenoid valves	Air	SDS	Air	SDS	3-way solenoid valves		Air	SDS	3-way solenoid valves		Air	SDS	3-way solenoid valves	1
Manual valves	Air	SDS	Air	SDS	Manual valves		Air	SDS	Manual valves		Air	SDS	Manual valves	1
Sample probes	Air	SDS	Air	SDS	Sample probes		Air	SDS	Sample probes		Air	SDS	Sample probes	1
Air Selector Valve	Air	CO2_removal_4BMS	Air	CO2_removal_4BMS	Air Selector Valve		Air	CO2_removal_4BMS	Air Selector Valve		Air	CO2_removal_4BMS	Air Selector Valve	1
Desiccant Bed	Air	CO2_removal_4BMS	Air	CO2_removal_4BMS	Desiccant Bed		Air	CO2_removal_4BMS	Desiccant Bed		Air	CO2_removal_4BMS	Desiccant Bed	1
Adsorbent Bed	Air	CO2_removal_4BMS	Air	CO2_removal_4BMS	Adsorbent Bed		Air	CO2_removal_4BMS	Adsorbent Bed		Air	CO2_removal_4BMS	Adsorbent Bed	1
Air Check Valve	Air	CO2_removal_4BMS	Air	CO2_removal_4BMS	Air Check Valve		Air	CO2_removal_4BMS	Air Check Valve		Air	CO2_removal_4BMS	Air Check Valve	1
Heater Controller	Air	CO2_removal_4BMS	Air	CO2_removal_4BMS	Heater Controller		Air	CO2_removal_4BMS	Heater Controller		Air	CO2_removal_4BMS	Heater Controller	1
Air Blower	Air	CO2_removal_4BMS	Air	CO2_removal_4BMS	Air Blower		Air	CO2_removal_4BMS	Air Blower		Air	CO2_removal_4BMS	Air Blower	1
Precooler	Air	CO2_removal_4BMS	Air	CO2_removal_4BMS	Precooler		Air	CO2_removal_4BMS	Precooler		Air	CO2_removal_4BMS	Precooler	1
Blower/precooler Motor Controller	Air	CO2_removal_4BMS	Air	CO2_removal_4BMS	Blower/precooler Motor Controller		Air	CO2_removal_4BMS	Blower/precooler Motor Controller		Air	CO2_removal_4BMS	Blower/precooler Motor Controller	1
CO2 Pump	Air	CO2_removal_4BMS	Air	CO2_removal_4BMS	CO2 Pump		Air	CO2_removal_4BMS	CO2 Pump		Air	CO2_removal_4BMS	CO2 Pump	1
CO2 Pump Motor Controller	Air	CO2_removal_4BMS	Air	CO2_removal_4BMS	CO2 Pump Motor Controller		Air	CO2_removal_4BMS	CO2 Pump Motor Controller		Air	CO2_removal_4BMS	CO2 Pump Motor Controller	1
Temperature Sensor	Air	CO2_removal_4BMS	Air	CO2_removal_4BMS	Temperature Sensor		Air	CO2_removal_4BMS	Temperature Sensor		Air	CO2_removal_4BMS	Temperature Sensor	1
Differential Pressure Sensor	Air	CO2_removal_4BMS	Air	CO2_removal_4BMS	Differential Pressure Sensor		Air	CO2_removal_4BMS	Differential Pressure Sensor		Air	CO2_removal_4BMS	Differential Pressure Sensor	1
Absolute Pressure Sensor	Air	CO2_removal_4BMS	Air	CO2_removal_4BMS	Absolute Pressure Sensor		Air	CO2_removal_4BMS	Absolute Pressure Sensor		Air	CO2_removal_4BMS	Absolute Pressure Sensor	1
Electrical Harness	Air	CO2_removal_4BMS	Air	CO2_removal_4BMS	Electrical Harness		Air	CO2_removal_4BMS	Electrical Harness		Air	CO2_removal_4BMS	Electrical Harness	1
Plumbing	Air	CO2_removal_4BMS	Air	CO2_removal_4BMS	Plumbing		Air	CO2_removal_4BMS	Plumbing		Air	CO2_removal_4BMS	Plumbing	1
Support Structure	Air	CO2_removal_4BMS	Air	CO2_removal_4BMS	Support Structure		Air	CO2_removal_4BMS	Support Structure		Air	CO2_removal_4BMS	Support Structure	1
Fluid Disconnects	Air	CO2_removal_4BMS	Air	CO2_removal_4BMS	Fluid Disconnects		Air	CO2_removal_4BMS	Fluid Disconnects		Air	CO2_removal_4BMS	Fluid Disconnects	1
Electronics coldplate	Air	CO2_removal_4BMS	Air	CO2_removal_4BMS	Electronics coldplate		Air	CO2_removal_4BMS	Electronics coldplate		Air	CO2_removal_4BMS	Electronics coldplate	1
Electronics Interface Plate	Air	CO2_removal_4BMS	Air	CO2_removal_4BMS	Electronics Interface Plate		Air	CO2_removal_4BMS	Electronics Interface Plate		Air	CO2_removal_4BMS	Electronics Interface Plate	1
MD Shield Instl	Air	N2_storage	Air	N2_storage	MD Shield Instl		Air	N2_storage	MD Shield Instl		Air	N2_storage	MD Shield Instl	1
Multilayer Insulation Assembly-T #1	Air	N2_storage	Air	N2_storage	Multilayer Insulation Assembly-T #1		Air	N2_storage	Multilayer Insulation Assembly-T #1		Air	N2_storage	Multilayer Insulation Assembly-T #1	1
Multilayer Insulation Assembly-T #2	Air	N2_storage	Air	N2_storage	Multilayer Insulation Assembly-T #2		Air	N2_storage	Multilayer Insulation Assembly-T #2		Air	N2_storage	Multilayer Insulation Assembly-T #2	1
Primary Structure Assembly -HPG ORU	Air	N2_storage	Air	N2_storage	Primary Structure Assembly -HPG ORU		Air	N2_storage	Primary Structure Assembly -HPG ORU		Air	N2_storage	Primary Structure Assembly -HPG ORU	1
Tank ORU Assembly	Air	N2_storage	Air	N2_storage	Tank ORU Assembly		Air	N2_storage	Tank ORU Assembly		Air	N2_storage	Tank ORU Assembly	1
Utilities Installation - O2/N2 Tank	Air	N2_storage	Air	N2_storage	Utilities Installation - O2/N2 Tank		Air	N2_storage	Utilities Installation - O2/N2 Tank		Air	N2_storage	Utilities Installation - O2/N2 Tank	1
N2 Bare Tank	Air	N2_storage	Air	N2_storage	N2 Bare Tank		Air	N2_storage	N2 Bare Tank		Air	N2_storage	N2 Bare Tank	1
HPGA Fluid	Air	N2_storage	Air	N2_storage	HPGA Fluid		Air	N2_storage	HPGA Fluid		Air	N2_storage	HPGA Fluid	1
Handhold, top mounted	Air	N2_storage	Air	N2_storage	Handhold, top mounted		Air	N2_storage	Handhold, top mounted		Air	N2_storage	Handhold, top mounted	1
Handrail 21.941 in custom	Air	N2_storage	Air	N2_storage	Handrail 21.941 in custom		Air	N2_storage	Handrail 21.941 in custom		Air	N2_storage	Handrail 21.941 in custom	1
Handrail, top mounted	Air	N2_storage	Air	N2_storage	Handrail, top mounted		Air	N2_storage	Handrail, top mounted		Air	N2_storage	Handrail, top mounted	1
Grapple fixture, flt releasable	Air	N2_storage	Air	N2_storage	Grapple fixture, flt releasable		Air	N2_storage	Grapple fixture, flt releasable		Air	N2_storage	Grapple fixture, flt releasable	1
Accessories	Air	N2_storage	Air	N2_storage	Accessories		Air	N2_storage	Accessories		Air	N2_storage	Accessories	1
MD Shield Instl	Air	O2_storage	Air	O2_storage	MD Shield Instl		Air	O2_storage	MD Shield Instl		Air	O2_storage	MD Shield Instl	1
Multilayer Insulation Assembly-T #1	Air	O2_storage	Air	O2_storage	Multilayer Insulation Assembly-T #1		Air	O2_storage	Multilayer Insulation Assembly-T #1		Air	O2_storage	Multilayer Insulation Assembly-T #1	1
Multilayer Insulation Assembly-T #2	Air	O2_storage	Air	O2_storage	Multilayer Insulation Assembly-T #2		Air	O2_storage	Multilayer Insulation Assembly-T #2		Air	O2_storage	Multilayer Insulation Assembly-T #2	1
Primary Structure Assembly -HPG ORU	Air	O2_storage	Air	O2_storage	Primary Structure Assembly -HPG ORU		Air	O2_storage	Primary Structure Assembly -HPG ORU		Air	O2_storage	Primary Structure Assembly -HPG ORU	1
Tank ORU Assembly	Air	O2_storage	Air	O2_storage	Tank ORU Assembly		Air	O2_storage	Tank ORU Assembly		Air	O2_storage	Tank ORU Assembly	1
Utilities Installation - O2/N2 Tank	Air	O2_storage	Air	O2_storage	Utilities Installation - O2/N2 Tank		Air	O2_storage	Utilities Installation - O2/N2 Tank		Air	O2_storage	Utilities Installation - O2/N2 Tank	1
O2 Bare Tank	Air	O2_storage	Air	O2_storage	O2 Bare Tank		Air	O2_storage	O2 Bare Tank		Air	O2_storage	O2 Bare Tank	1
HPGA Fluid	Air	O2_storage	Air	O2_storage	HPGA Fluid		Air	O2_storage	HPGA Fluid		Air	O2_storage	HPGA Fluid	1
Handhold, top mounted	Air	O2_storage	Air	O2_storage	Handhold, top mounted		Air	O2_storage	Handhold, top mounted		Air	O2_storage	Handhold, top mounted	1
Handrail 21.941 in custom	Air	O2_storage	Air	O2_storage	Handrail 21.941 in custom		Air	O2_storage	Handrail 21.941 in custom		Air	O2_storage	Handrail 21.941 in custom	1
Handrail, top mounted	Air	O2_storage	Air	O2_storage	Handrail, top mounted		Air	O2_storage	Handrail, top mounted		Air	O2_storage	Handrail, top mounted	1
Grapple fixture, flt releasable	Air	O2_storage	Air	O2_storage	Grapple fixture, flt releasable		Air	O2_storage	Grapple fixture, flt releasable		Air	O2_storage	Grapple fixture, flt releasable	1
Accessories	Air	O2_storage	Air	O2_storage	Accessories		Air	O2_storage	Accessories		Air	O2_storage	Accessories	1
Condensing Heat Exchanger	Air	CO2_reduction_sabatier	Air	CO2_reduction_sabatier	Condensing Heat Exchanger		Air	CO2_reduction_sabatier	Condensing Heat Exchanger		Air	CO2_reduction_sabatier	Condensing Heat Exchanger	1
AAA heat exchanger	Air	CO2_reduction_sabatier	Air	CO2_reduction_sabatier	AAA heat exchanger		Air	CO2_reduction_sabatier	AAA heat exchanger		Air	CO2_reduction_sabatier	AAA heat exchanger	1
ITCS Coolant Water Inlet QD	Air	CO2_reduction_sabatier	Air	CO2_reduction_sabatier	ITCS Coolant Water Inlet QD		Air	CO2_reduction_sabatier	ITCS Coolant Water Inlet QD		Air	CO2_reduction_sabatier	ITCS Coolant Water Inlet QD	1
ITCS Coolant Water Outlet QD	Air	CO2_reduction_sabatier	Air	CO2_reduction_sabatier	ITCS Coolant Water Outlet QD		Air	CO2_reduction_sabatier	ITCS Coolant Water Outlet QD		Air	CO2_reduction_sabatier	ITCS Coolant Water Outlet QD	1
Heat Exchanger Inlet Temp	Air	CO2_reduction_sabatier	Air	CO2_reduction_sabatier	Heat Exchanger Inlet Temp		Air	CO2_reduction_sabatier	Heat Exchanger Inlet Temp		Air	CO2_reduction_sabatier	Heat Exchanger Inlet Temp	1
Heat Exchanger Outlet Temp	Air	CO2_reduction_sabatier	Air	CO2_reduction_sabatier	Heat Exchanger Outlet Temp		Air	CO2_reduction_sabatier	Heat Exchanger Outlet Temp		Air	CO2_reduction_sabatier	Heat Exchanger Outlet Temp	1
Manifold, CO2	Air	CO2_reduction_sabatier	Air	CO2_reduction_sabatier	Manifold, CO2		Air	CO2_reduction_sabatier	Manifold, CO2		Air	CO2_reduction_sabatier	Manifold, CO2	1
CO2 Inlet Check Valve	Air	CO2_reduction_sabatier	Air	CO2_reduction_sabatier	CO2 Inlet Check Valve		Air	CO2_reduction_sabatier	CO2 Inlet Check Valve		Air	CO2_reduction_sabatier	CO2 Inlet Check Valve	1
CO2 Inlet Filter	Air	CO2_reduction_sabatier	Air	CO2_reduction_sabatier	CO2 Inlet Filter		Air	CO2_reduction_sabatier	CO2 Inlet Filter		Air	CO2_reduction_sabatier	CO2 Inlet Filter	1
Pressure sensor, CO2 Inlet	Air	CO2_reduction_sabatier	Air	CO2_reduction_sabatier	Pressure sensor, CO2 Inlet		Air	CO2_reduction_sabatier	Pressure sensor, CO2 Inlet		Air	CO2_reduction_sabatier	Pressure sensor, CO2 Inlet	1
CO2 Inlet QD	Air	CO2_reduction_sabatier	Air	CO2_reduction_sabatier	CO2 Inlet QD		Air	CO2_reduction_sabatier	CO2 Inlet QD		Air	CO2_reduction_sabatier	CO2 Inlet QD	1
CO2 Inlet Regulator	Air	CO2_reduction_sabatier	Air	CO2_reduction_sabatier	CO2 Inlet Regulator		Air	CO2_reduction_sabatier	CO2 Inlet Regulator		Air	CO2_reduction_sabatier	CO2 Inlet Regulator	1
CO2 Inlet NC Solenoid	Air	CO2_reduction_sabatier	Air	CO2_reduction_sabatier	CO2 Inlet NC Solenoid		Air	CO2_reduction_sabatier	CO2 Inlet NC Solenoid		Air	CO2_reduction_sabatier	CO2 Inlet NC Solenoid	1
CO2 Inlet Flow Control	Air	CO2_reduction_sabatier	Air	CO2_reduction_sabatier	CO2 Inlet Flow Control		Air	CO2_reduction_sabatier	CO2 Inlet Flow Control		Air	CO2_reduction_sabatier	CO2 Inlet Flow Control	1
CO2 Flow Control Orifice	Air	CO2_reduction_sabatier	Air	CO2_reduction_sabatier	CO2 Flow Control Orifice		Air	CO2_reduction_sabatier	CO2 Flow Control Orifice		Air	CO2_reduction_sabatier	CO2 Flow Control Orifice	1
Delta P Sensor, Flow Sensor CO2	Air	CO2_reduction_sabatier	Air	CO2_reduction_sabatier	Delta P Sensor, Flow Sensor CO2		Air	CO2_reduction_sabatier	Delta P Sensor, Flow Sensor CO2		Air	CO2_reduction_sabatier	Delta P Sensor, Flow Sensor CO2	1
CO2 Flow Meter Orifice	Air	CO2_reduction_sabatier	Air	CO2_reduction_sabatier	CO2 Flow Meter Orifice		Air	CO2_reduction_sabatier	CO2 Flow Meter Orifice		Air	CO2_reduction_sabatier	CO2 Flow Meter Orifice	1
Manifold, Hydrogen	Air	CO2_reduction_sabatier	Air	CO2_reduction_sabatier	Manifold, Hydrogen		Air	CO2_reduction_sabatier	Manifold, Hydrogen		Air	CO2_reduction_sabatier	Manifold, Hydrogen	1
Water Outlet Quick Disconnect	Air	CO2_reduction_sabatier	Air	CO2_reduction_sabatier	Water Outlet Quick Disconnect		Air	CO2_reduction_sabatier	Water Outlet Quick Disconnect		Air	CO2_reduction_sabatier	Water Outlet Quick Disconnect	1
Hydrogen Inlet Check Valve	Air	CO2_reduction_sabatier	Air	CO2_reduction_sabatier	Hydrogen Inlet Check Valve		Air	CO2_reduction_sabatier	Hydrogen Inlet Check Valve		Air	CO2_reduction_sabatier	Hydrogen Inlet Check Valve	1
Hydrogen Inlet Filter	Air	CO2_reduction_sabatier	Air	CO2_reduction_sabatier	Hydrogen Inlet Filter		Air	CO2_reduction_sabatier	Hydrogen Inlet Filter		Air	CO2_reduction_sabatier	Hydrogen Inlet Filter	1
H2O Outlet Pressure Sensor	Air	CO2_reduction_sabatier	Air	CO2_reduction_sabatier	H2O Outlet Pressure Sensor		Air	CO2_reduction_sabatier	H2O Outlet Pressure Sensor		Air	CO2_reduction_sabatier	H2O Outlet Pressure Sensor	1
Hydrogen Inlet Quick Disconnect	Air	CO2_reduction_sabatier	Air	CO2_reduction_sabatier	Hydrogen Inlet Quick Disconnect		Air	CO2_reduction_sabatier	Hydrogen Inlet Quick Disconnect		Air	CO2_reduction_sabatier	Hydrogen Inlet Quick Disconnect	1
Hydrogen Inlet NC Solenoid	Air	CO2_reduction_sabatier	Air	CO2_reduction_sabatier	Hydrogen Inlet NC Solenoid		Air	CO2_reduction_sabatier	Hydrogen Inlet NC Solenoid		Air	CO2_reduction_sabatier	Hydrogen Inlet NC Solenoid	1
Delta P Sensor, Flow Sensor H2	Air	CO2_reduction_sabatier	Air	CO2_reduction_sabatier	Delta P Sensor, Flow Sensor H2		Air	CO2_reduction_sabatier	Delta P Sensor, Flow Sensor H2		Air	CO2_reduction_sabatier	Delta P Sensor, Flow Sensor H2	1
H2 Flow Meter Orifice	Air	CO2_reduction_sabatier	Air	CO2_reduction_sabatier	H2 Flow Meter Orifice		Air	CO2_reduction_sabatier	H2 Flow Meter Orifice		Air	CO2_reduction_sabatier	H2 Flow Meter Orifice	1
Manifold, Vent	Air	CO2_reduction_sabatier	Air	CO2_reduction_sabatier	Manifold, Vent		Air	CO2_reduction_sabatier	Manifold, Vent		Air	CO2_reduction_sabatier	Manifold, Vent	1
Liquid Sensor	Air	CO2_reduction_sabatier	Air	CO2_reduction_sabatier	Liquid Sensor		Air	CO2_reduction_sabatier	Liquid Sensor		Air	CO2_reduction_sabatier	Liquid Sensor	1
Vent Pressure Sensor	Air	CO2_reduction_sabatier	Air	CO2_reduction_sabatier	Vent Pressure Sensor		Air	CO2_reduction_sabatier	Vent Pressure Sensor		Air	CO2_reduction_sabatier	Vent Pressure Sensor	1
Vent Outlet Quick Disconnect	Air	CO2_reduction_sabatier	Air	CO2_reduction_sabatier	Vent Outlet Quick Disconnect		Air	CO2_reduction_sabatier	Vent Outlet Quick Disconnect		Air	CO2_reduction_sabatier	Vent Outlet Quick Disconnect	1
Vent Regulator	Air	CO2_reduction_sabatier	Air	CO2_reduction_sabatier	Vent Regulator		Air	CO2_reduction_sabatier	Vent Regulator		Air	CO2_reduction_sabatier	Vent Regulator	1
Vent Relief/Check #1	Air	CO2_reduction_sabatier	Air	CO2_reduction_sabatier	Vent Relief/Check #1		Air	CO2_reduction_sabatier	Vent Relief/Check #1		Air	CO2_reduction_sabatier	Vent Relief/Check #1	1
Vent Relief/Check #2	Air	CO2_reduction_sabatier	Air	CO2_reduction_sabatier	Vent Relief/Check #2		Air	CO2_reduction_sabatier	Vent Relief/Check #2		Air	CO2_reduction_sabatier	Vent Relief/Check #2	1
Vent Outlet NO Solenoid	Air	CO2_reduction_sabatier	Air	CO2_reduction_sabatier	Vent Outlet NO Solenoid		Air	CO2_reduction_sabatier	Vent Outlet NO Solenoid		Air	CO2_reduction_sabatier	Vent Outlet NO Solenoid	1
Water Pressure Sensor	Air	CO2_reduction_sabatier	Air	CO2_reduction_sabatier	Water Pressure Sensor		Air	CO2_reduction_sabatier	Water Pressure Sensor		Air	CO2_reduction_sabatier	Water Pressure Sensor	1
Water Relief	Air	CO2_reduction_sabatier	Air	CO2_reduction_sabatier	Water Relief		Air	CO2_reduction_sabatier	Water Relief		Air	CO2_reduction_sabatier	Water Relief	1
Water Outlet NC Solenoid	Air	CO2_reduction_sabatier	Air	CO2_reduction_sabatier	Water Outlet NC Solenoid		Air	CO2_reduction_sabatier	Water Outlet NC Solenoid		Air	CO2_reduction_sabatier	Water Outlet NC Solenoid	1
Rotary Water Separator Assembly	Air	CO2_reduction_sabatier	Air	CO2_reduction_sabatier	Rotary Water Separator Assembly		Air	CO2_reduction_sabatier	Rotary Water Separator Assembly		Air	CO2_reduction_sabatier	Rotary Water Separator Assembly	1
Sabatier Reactor Assembly	Air	CO2_reduction_sabatier	Air	CO2_reduction_sabatier	Sabatier Reactor Assembly		Air	CO2_reduction_sabatier	Sabatier Reactor Assembly		Air	CO2_reduction_sabatier	Sabatier Reactor Assembly	1
Structure (A/R)	Air	CO2_reduction_sabatier	Air	CO2_reduction_sabatier	Structure (A/R)		Air	CO2_reduction_sabatier	Structure (A/R)		Air	CO2_reduction_sabatier	Structure (A/R)	1
Miscellaneous Hardware (Clampts, bolts, etc.) (A/R)	Air	CO2_reduction_sabatier	Air	CO2_reduction_sabatier	Miscellaneous Hardware (Clampts, bolts, etc.) (A/R)		Air	CO2_reduction_sabatier	Miscellaneous Hardware (Clampts, bolts, etc.) (A/R)		Air	CO2_reduction_sabatier	Miscellaneous Hardware (Clampts, bolts, etc.) (A/R)	1
Air Cooling NC Solenoid	Air	CO2_reduction_sabatier	Air	CO2_reduction_sabatier	Air Cooling NC Solenoid		Air	CO2_reduction_sabatier	Air Cooling NC Solenoid		Air	CO2_reduction_sabatier	Air Cooling NC Solenoid	1
Air Inlet Filter	Air	CO2_reduction_sabatier	Air	CO2_reduction_sabatier	Air Inlet Filter		Air	CO2_reduction_sabatier	Air Inlet Filter		Air	CO2_reduction_sabatier	Air Inlet Filter	1
Air Sabatier Orifice	Air	CO2_reduction_sabatier	Air	CO2_reduction_sabatier	Air Sabatier Orifice		Air	CO2_reduction_sabatier	Air Sabatier Orifice		Air	CO2_reduction_sabatier	Air Sabatier Orifice	1
Heat Exchanger Inlet Duct	Air	CO2_reduction_sabatier	Air	CO2_reduction_sabatier	Heat Exchanger Inlet Duct		Air	CO2_reduction_sabatier	Heat Exchanger Inlet Duct		Air	CO2_reduction_sabatier	Heat Exchanger Inlet Duct	1
Heat Exchanger Outlet Duct	Air	CO2_reduction_sabatier	Air	CO2_reduction_sabatier	Heat Exchanger Outlet Duct		Air	CO2_reduction_sabatier	Heat Exchanger Outlet Duct		Air	CO2_reduction_sabatier	Heat Exchanger Outlet Duct	1
Reactor Inlet Duct	Air	CO2_reduction_sabatier	Air	CO2_reduction_sabatier	Reactor Inlet Duct		Air	CO2_reduction_sabatier	Reactor Inlet Duct		Air	CO2_reduction_sabatier	Reactor Inlet Duct	1
Reactor Outlet Duct	Air	CO2_reduction_sabatier	Air	CO2_reduction_sabatier	Reactor Outlet Duct		Air	CO2_reduction_sabatier	Reactor Outlet Duct		Air	CO2_reduction_sabatier	Reactor Outlet Duct	1
Tubing (A/R)	Air	CO2_reduction_sabatier	Air	CO2_reduction_sabatier	Tubing (A/R)		Air	CO2_reduction_sabatier	Tubing (A/R)		Air	CO2_reduction_sabatier	Tubing (A/R)	1
Harnesses	Air	CO2_reduction_sabatier	Air	CO2_reduction_sabatier	Harnesses		Air	CO2_reduction_sabatier	Harnesses		Air	CO2_reduction_sabatier	Harnesses	1
Valves & Sensors' total power	Air	CO2_reduction_sabatier	Air	CO2_reduction_sabatier	Valves & Sensors' total power		Air	CO2_reduction_sabatier	Valves & Sensors' total power		Air	CO2_reduction_sabatier	Valves & Sensors' total power	1
Mechanical Compressor ORU	Air	CO2_reduction_sabatier	Air	CO2_reduction_sabatier	Mechanical Compressor ORU		Air	CO2_reduction_sabatier	Mechanical Compressor ORU		Air	CO2_reduction_sabatier	Mechanical Compressor ORU	1
Compressor Manifold Assembly	Air	CO2_reduction_sabatier	Air	CO2_reduction_sabatier	Compressor Manifold Assembly		Air	CO2_reduction_sabatier	Compressor Manifold Assembly		Air	CO2_reduction_sabatier	Compressor Manifold Assembly	1
Controller Assembly	Air	CO2_reduction_sabatier	Air	CO2_reduction_sabatier	Controller Assembly		Air	CO2_reduction_sabatier	Controller Assembly		Air	CO2_reduction_sabatier	Controller Assembly	1
CO2 Accumulator	Air	CO2_reduction_sabatier	Air	CO2_reduction_sabatier	CO2 Accumulator		Air	CO2_reduction_sabatier	CO2 Accumulator		Air	CO2_reduction_sabatier	CO2 Accumulator	1
Deionizing Bed ORU (Inlet)	Air	O2_generation_ISS	Air	OGS_ISS	Deionizing Bed ORU (Inlet)		Air	OGS_ISS	Deionizing Bed ORU (Inlet)		Air	OGS_ISS	Deionizing Bed ORU (Inlet)	1
Deionizing Bed ORU (Recirculating)	Air	O2_generation_ISS	Air	OGS_ISS	Deionizing Bed ORU (Recirculating)		Air	OGS_ISS	Deionizing Bed ORU (Recirculating)		Air	OGS_ISS	Deionizing Bed ORU (Recirculating)	1
Oxygen/Water ORU	Air	O2_generation_ISS	Air	OGS_ISS	Oxygen/Water ORU		Air	OGS_ISS	Oxygen/Water ORU		Air	OGS_ISS	Oxygen/Water ORU	1
Pump ORU	Air	O2_generation_ISS	Air	OGS_ISS	Pump ORU		Air	OGS_ISS	Pump ORU		Air	OGS_ISS	Pump ORU	1
Oxygen Phase Separator ORU	Air	O2_generation_ISS	Air	OGS_ISS	Oxygen Phase Separator ORU		Air	OGS_ISS	Oxygen Phase Separator ORU		Air	OGS_ISS	Oxygen Phase Separator ORU	1
Hydrogen ORU	Air	O2_generation_ISS	Air	OGS_ISS	Hydrogen ORU		Air	OGS_ISS	Hydrogen ORU		Air	OGS_ISS	Hydrogen ORU	1
Hydrogen Sensor ORU	Air	O2_generation_ISS	Air	OGS_ISS	Hydrogen Sensor ORU		Air	OGS_ISS	Hydrogen Sensor ORU		Air	OGS_ISS	Hydrogen Sensor ORU	1
Process Controller	Air	O2_generation_ISS	Air	OGS_ISS	Process Controller		Air	OGS_ISS	Process Controller		Air	OGS_ISS	Process Controller	1
Power Supply Module (PSM)	Air	O2_generation_ISS	Air	OGS_ISS	Power Supply Module (PSM)		Air	OGS_ISS	Power Supply Module (PSM)		Air	OGS_ISS	Power Supply Module (PSM)	1
Fire Detection Assembly	Air	Fire_det_sup	Air	Fire_det_sup	Fire Detection Assembly		Air	Fire_det_sup	Fire Detection Assembly		Air	Fire_det_sup	Fire Detection Assembly	1
Portable Fire Extinguisher	Air	Fire_det_sup	Air	Fire_det_sup	Portable Fire Extinguisher		Air	Fire_det_sup	Portable Fire Extinguisher		Air	Fire_det_sup	Portable Fire Extinguisher	1
Regenerator 1	Air	ACO2R	Air	ACO2R	Regenerator 1		Air	ACO2R	Regenerator 1		Air	ACO2R	Regenerator 1	1
Metox Canisters	Air	ACO2R	Air	ACO2R	Metox Canisters		Air	ACO2R	Metox Canisters		Air	ACO2R	Metox Canisters	1
Activated charcoal bed	Air	TCCS_ISS	Air	TCCS_ISS	Activated charcoal bed		Air	TCCS_ISS	Activated charcoal bed		Air	TCCS_ISS	Activated charcoal bed	1
Blower Assembly	Air	TCCS_ISS	Air	TCCS_ISS	Blower Assembly		Air	TCCS_ISS	Blower Assembly		Air	TCCS_ISS	Blower Assembly	1
Flow Meter Assembly	Air	TCCS_ISS	Air	TCCS_ISS	Flow Meter Assembly		Air	TCCS_ISS	Flow Meter Assembly		Air	TCCS_ISS	Flow Meter Assembly	1
Catalytic Oxidizer Assembly	Air	TCCS_ISS	Air	TCCS_ISS	Catalytic Oxidizer Assembly		Air	TCCS_ISS	Catalytic Oxidizer Assembly		Air	TCCS_ISS	Catalytic Oxidizer Assembly	1
LiOH Sorbent bed assembly	Air	TCCS_ISS	Air	TCCS_ISS	LiOH Sorbent bed assembly		Air	TCCS_ISS	LiOH Sorbent bed assembly		Air	TCCS_ISS	LiOH Sorbent bed assembly	1
Electrical interface assembly	Air	TCCS_ISS	Air	TCCS_ISS	Electrical interface assembly		Air	TCCS_ISS	Electrical interface assembly		Air	TCCS_ISS	Electrical interface assembly	1
Aluminum Compaction cylinder	Waste	PMWC	Waste	PMWC	Aluminum Compaction cylinder		Waste	PMWC	Aluminum Compaction cylinder		Waste	PMWC	Aluminum Compaction cylinder	1
Band-type heating unit	Waste	PMWC	Waste	PMWC	Band-type heating unit		Waste	PMWC	Band-type heating unit		Waste	PMWC	Band-type heating unit	1
Commercial Lightweight, oil-less, compressor/vacuum pump	Waste	PMWC	Waste	PMWC	Commercial Lightweight, oil-less, compressor/vacuum pump		Waste	PMWC	Commercial Lightweight, oil-less, compressor/vacuum pump		Waste	PMWC	Commercial Lightweight, oil-less, compressor/vacuum pump	1
Temperature sensor	Waste	PMWC	Waste	PMWC	Temperature sensor		Waste	PMWC	Temperature sensor		Waste	PMWC	Temperature sensor	1
Pressure sensor	Waste	PMWC	Waste	PMWC	Pressure sensor		Waste	PMWC	Pressure sensor		Waste	PMWC	Pressure sensor	1
Housing & Mounting Equipment	Waste	PMWC	Waste	PMWC	Housing & Mounting Equipment		Waste	PMWC	Housing & Mounting Equipment		Waste	PMWC	Housing & Mounting Equipment	1
Condensing Heat Exchanger	Waste	PMWC	Waste	PMWC	Condensing Heat Exchanger		Waste	PMWC	Condensing Heat Exchanger		Waste	PMWC	Condensing Heat Exchanger	1
Cooling system	Waste	PMWC	Waste	PMWC	Cooling system		Waste	PMWC	Cooling system		Waste	PMWC	Cooling system	1
Low Density PolyEthylene Box	Waste	Waste_storage	Waste	Waste_storage	Low Density PolyEthylene Box		Waste	Waste_storage	Low Density PolyEthylene Box		Waste	Waste_storage	Low Density PolyEthylene Box	1
Commode/Urinal	Waste	Waste_collection_ISS	Waste	Waste_collection_ISS	Commode/Urinal		Waste	Waste_collection_ISS	Commode/Urinal		Waste	Waste_collection_ISS	Commode/Urinal	1
Fan	Waste	Waste_collection_ISS	Waste	Waste_collection_ISS	Fan		Waste	Waste_collection_ISS	Fan		Waste	Waste_collection_ISS	Fan	1
Urine Separator	Waste	Waste_collection_ISS	Waste	Waste_collection_ISS	Urine Separator		Waste	Waste_collection_ISS	Urine Separator		Waste	Waste_collection_ISS	Urine Separator	1
Urine Vent Heater	Waste	Waste_collection_ISS	Waste	Waste_collection_ISS	Urine Vent Heater		Waste	Waste_collection_ISS	Urine Vent Heater		Waste	Waste_collection_ISS	Urine Vent Heater	1
Fecal Bags	Waste	Waste_collection_ISS	Waste	Waste_collection_ISS	Fecal Bags		Waste	Waste_collection_ISS	Fecal Bags		Waste	Waste_collection_ISS	Fecal Bags	1
Wipes, Dry	Waste	Waste_collection_ISS	Waste	Waste_collection_ISS	Wipes, Dry		Waste	Waste_collection_ISS	Wipes, Dry		Waste	Waste_collection_ISS	Wipes, Dry	1
Wipes, Wet	Waste	Waste_collection_ISS	Waste	Waste_collection_ISS	Wipes, Wet		Waste	Waste_collection_ISS	Wipes, Wet		Waste	Waste_collection_ISS	Wipes, Wet	1
Wipes, Toilet Tissue	Waste	Waste_collection_ISS	Waste	Waste_collection_ISS	Wipes, Toilet Tissue		Waste	Waste_collection_ISS	Wipes, Toilet Tissue		Waste	Waste_collection_ISS	Wipes, Toilet Tissue	1
Gloves	Waste	Waste_collection_ISS	Waste	Waste_collection_ISS	Gloves		Waste	Waste_collection_ISS	Gloves		Waste	Waste_collection_ISS	Gloves	1
Fecal Bags Odor Lids	Waste	Waste_collection_ISS	Waste	Waste_collection_ISS	Fecal Bags Odor Lids		Waste	Waste_collection_ISS	Fecal Bags Odor Lids		Waste	Waste_collection_ISS	Fecal Bags Odor Lids	1
Fecal collection Canisters	Waste	Waste_collection_ISS	Waste	Waste_collection_ISS	Fecal collection Canisters		Waste	Waste_collection_ISS	Fecal collection Canisters		Waste	Waste_collection_ISS	Fecal collection Canisters	1
Fecal collection Canisters lids	Waste	Waste_collection_ISS	Waste	Waste_collection_ISS	Fecal collection Canisters lids		Waste	Waste_collection_ISS	Fecal collection Canisters lids		Waste	Waste_collection_ISS	Fecal collection Canisters lids	1
Urine Prefilters	Waste	Waste_collection_ISS	Waste	Waste_collection_ISS	Urine Prefilters		Waste	Waste_collection_ISS	Urine Prefilters		Waste	Waste_collection_ISS	Urine Prefilters	1
Urine Filters	Waste	Waste_collection_ISS	Waste	Waste_collection_ISS	Urine Filters		Waste	Waste_collection_ISS	Urine Filters		Waste	Waste_collection_ISS	Urine Filters	1
Urine Funnels	Waste	Waste_collection_ISS	Waste	Waste_collection_ISS	Urine Funnels		Waste	Waste_collection_ISS	Urine Funnels		Waste	Waste_collection_ISS	Urine Funnels	1
Flush Water Transfer Bags	Waste	Waste_collection_ISS	Waste	Waste_collection_ISS	Flush Water Transfer Bags		Waste	Waste_collection_ISS	Flush Water Transfer Bags		Waste	Waste_collection_ISS	Flush Water Transfer Bags	1
Activated charcoal bed	Waste	TCCS_ISS_x3	Waste	TCCS_ISS_2	Activated charcoal bed		Waste	TCCS_ISS_2	Activated charcoal bed		Waste	TCCS_ISS_2	Activated charcoal bed	1
Blower Assembly	Waste	TCCS_ISS_x4	Waste	TCCS_ISS_2	Blower Assembly		Waste	TCCS_ISS_2	Blower Assembly		Waste	TCCS_ISS_2	Blower Assembly	1
Flow Meter Assembly	Waste	TCCS_ISS_x5	Waste	TCCS_ISS_2	Flow Meter Assembly		Waste	TCCS_ISS_2	Flow Meter Assembly		Waste	TCCS_ISS_2	Flow Meter Assembly	1
Catalytic Oxidizer Assembly	Waste	TCCS_ISS_x6	Waste	TCCS_ISS_2	Catalytic Oxidizer Assembly		Waste	TCCS_ISS_2	Catalytic Oxidizer Assembly		Waste	TCCS_ISS_2	Catalytic Oxidizer Assembly	1
LiOH Sorbent bed assembly	Waste	TCCS_ISS_x7	Waste	TCCS_ISS_2	LiOH Sorbent bed assembly		Waste	TCCS_ISS_2	LiOH Sorbent bed assembly		Waste	TCCS_ISS_2	LiOH Sorbent bed assembly	1
Electrical interface assembly	Waste	TCCS_ISS_x8	Waste	TCCS_ISS_2	Electrical interface assembly		Waste	TCCS_ISS_2	Electrical interface assembly		Waste	TCCS_ISS_2	Electrical interface assembly	1
MLS Filter ORU	Water	Water_recovery_system	Water	VCD_ISS	MLS Filter ORU		Water	VCD_ISS	MLS Filter ORU		Water	WRS	MLS Filter ORU	1
Particulate Filter ORU	Water	Water_recovery_system	Water	VCD_ISS	Particulate Filter ORU		Water	VCD_ISS	Particulate Filter ORU		Water	WRS	Particulate Filter ORU	1
Multifiltration Bed #1 & #2 ORUs	Water	Water_recovery_system	Water	VCD_ISS	Multifiltration Bed #1 & #2 ORUs		Water	VCD_ISS	Multifiltration Bed #1 & #2 ORUs		Water	WRS	Multifiltration Bed #1 & #2 ORUs	1
Sensor ORU	Water	Water_recovery_system	Water	VCD_ISS	Sensor ORU		Water	VCD_ISS	Sensor ORU		Water	WRS	Sensor ORU	1
Piping	Water	Water_recovery_system	Water	VCD_ISS	Piping		Water	VCD_ISS	Piping		Water	WRS	Piping	1
Pump/MLS ORU	Water	Water_recovery_system	Water	VCD_ISS	Pump/MLS ORU		Water	VCD_ISS	Pump/MLS ORU		Water	WRS	Pump/MLS ORU	1
Catalytic Reactor & Preheeater ORU	Water	Water_recovery_system	Water	VCD_ISS	Catalytic Reactor & Preheeater ORU		Water	VCD_ISS	Catalytic Reactor & Preheeater ORU		Water	WRS	Catalytic Reactor & Preheeater ORU	1
Oxygen Filter	Water	Water_recovery_system	Water	VCD_ISS	Oxygen Filter		Water	VCD_ISS	Oxygen Filter		Water	WRS	Oxygen Filter	1
Microbial Check Valve	Water	Water_recovery_system	Water	VCD_ISS	Microbial Check Valve		Water	VCD_ISS	Microbial Check Valve		Water	WRS	Microbial Check Valve	1
Gas Separator ORU	Water	Water_recovery_system	Water	Potable_water_tank	Gas Separator ORU		Water	Potable_water_tank	Gas Separator ORU		Water	WRS	Gas Separator ORU	1
Hygiene H2O Tank	Water	Water_recovery_system	Water	Potable_water_tank	Hygiene H2O Tank		Water	Potable_water_tank	Hygiene H2O Tank		Water	WRS	Hygiene H2O Tank	1
Product H2O Tank	Water	Water_recovery_system	Water	WRS	Product H2O Tank		Water	WRS	Product H2O Tank		Water	WRS	Product H2O Tank	1
Process Controller	Water	Water_recovery_system	Water	WRS	Process Controller		Water	WRS	Process Controller		Water	WRS	Process Controller	1
Reactor Health Sensor	Water	Water_recovery_system	Water	WRS	Reactor Health Sensor		Water	WRS	Reactor Health Sensor		Water	WRS	Reactor Health Sensor	1
H2O Delivery System	Water	Water_recovery_system	Water	WRS	H2O Delivery System		Water	WRS	H2O Delivery System		Water	WRS	H2O Delivery System	1
			Water	WRS	Ion Exchange Bed		Water	WRS	Ion Exchange Bed		Water	WRS	Ion Exchange Bed	0
Pressure Control & Pump (PCPA)	Water	Urinary_primary_processing_ISS	Water	WRS	Pressure Control & Pump (PCPA)		Water	WRS	Pressure Control & Pump (PCPA)		Water	VCD_ISS	Pressure Control & Pump (PCPA)	1
Fluid Control & Pump (FCPA)	Water	Urinary_primary_processing_ISS	Water	WRS	Fluid Control & Pump (FCPA)		Water	WRS	Fluid Control & Pump (FCPA)		Water	VCD_ISS	Fluid Control & Pump (FCPA)	1
Recycle Filter Tank (RFTA)	Water	Urinary_primary_processing_ISS	Water	WRS	Recycle Filter Tank (RFTA)		Water	WRS	Recycle Filter Tank (RFTA)		Water	VCD_ISS	Recycle Filter Tank (RFTA)	1
Wastewater Storage Tank Assembly (WSTA)	Water	Urinary_primary_processing_ISS	Water	WRS	Wastewater Storage Tank Assembly (WSTA)		Water	WRS	Wastewater Storage Tank Assembly (WSTA)		Water	VCD_ISS	Wastewater Storage Tank Assembly (WSTA)	1
Distillation Assembly (DA)	Water	Urinary_primary_processing_ISS	Water	WRS	Distillation Assembly (DA)		Water	WRS	Distillation Assembly (DA)		Water	VCD_ISS	Distillation Assembly (DA)	1
Separator Plumbing Assembly (SPA)	Water	Urinary_primary_processing_ISS	Water	WRS	Separator Plumbing Assembly (SPA)		Water	WRS	Separator Plumbing Assembly (SPA)		Water	VCD_ISS	Separator Plumbing Assembly (SPA)	1
Power Module (Included in FCA)	Water	Urinary_primary_processing_ISS	Water	WRS	Power Module (Included in FCA)		Water	WRS	Power Module (Included in FCA)		Water	VCD_ISS	Power Module (Included in FCA)	1
Firmware Controller Assembly (Data module, power module)	Water	Urinary_primary_processing_ISS	Water	WRS	Firmware Controller Assembly (Data module, power module)		Water	WRS	Firmware Controller Assembly (Data module, power module)		Water	VCD_ISS	Firmware Controller Assembly (Data module, power module)	1
Piping	Water	Urinary_primary_processing_ISS	Water	WRS	Piping		Water	WRS	Piping		Water	VCD_ISS	Piping	1
Catalytic Reactor & Preheeater ORU	Water	Volatile_removal_assembly												0
Gas Separator ORU	Water	Volatile_removal_assembly												0
Oxygen Filter	Water	Volatile_removal_assembly												0
Piping	Water	Volatile_removal_assembly												0
Product H2O Tank	Water	Potable_water_tank	Water	WRS	Product H2O Tank		Water	WRS	Product H2O Tank		Water	Potable_water_tank	Product H2O Tank	1
H2O Stored	Water	Potable_water_tank	Water	WRS	H2O Stored		Water	WRS	H2O Stored		Water	Potable_water_tank	H2O Stored	1
Lockers	Food	Food_storage	Food	Stored_food	Packaging		Food	Stored_food	Packaging		Food	Stored_food	Packaging	0
			Food	Food_storage	Storage		Food	Food_storage	Storage		Food	Food_storage	Storage	0
Rehydration Unit and Conduction Oven	Food	Food_processing	Food	Food_processing	Rehydration Unit and Conduction Oven		Food	Food_processing	Rehydration Unit and Conduction Oven		Food	Food_processing	Rehydration Unit and Conduction Oven	1
Inlet ORU	Thermal	CCAA	Thermal	CCAA	Inlet ORU		Thermal	CCAA	Inlet ORU		Thermal	CCAA	Inlet ORU	1
Condensing heat exchanger	Thermal	CCAA	Thermal	CCAA	Condensing heat exchanger		Thermal	CCAA	Condensing heat exchanger		Thermal	CCAA	Condensing heat exchanger	1
Water separator	Thermal	CCAA	Thermal	CCAA	Water separator		Thermal	CCAA	Water separator		Thermal	CCAA	Water separator	1
Temp. Control & Check Valve	Thermal	CCAA	Thermal	CCAA	Temp. Control & Check Valve		Thermal	CCAA	Temp. Control & Check Valve		Thermal	CCAA	Temp. Control & Check Valve	1
Electrical Interface Box (EIB)	Thermal	CCAA	Thermal	CCAA	Electrical Interface Box (EIB)		Thermal	CCAA	Electrical Interface Box (EIB)		Thermal	CCAA	Electrical Interface Box (EIB)	1
Temp. Sensor	Thermal	CCAA	Thermal	CCAA	Temp. Sensor		Thermal	CCAA	Temp. Sensor		Thermal	CCAA	Temp. Sensor	1
Liquid Sensor	Thermal	CCAA	Thermal	CCAA	Liquid Sensor		Thermal	CCAA	Liquid Sensor		Thermal	CCAA	Liquid Sensor	1
Fan Delta P Sensor	Thermal	CCAA	Thermal	CCAA	Fan Delta P Sensor		Thermal	CCAA	Fan Delta P Sensor		Thermal	CCAA	Fan Delta P Sensor	1
Pressure Sensor	Thermal	CCAA	Thermal	CCAA	Pressure Sensor		Thermal	CCAA	Pressure Sensor		Thermal	CCAA	Pressure Sensor	1
HEPA Filter Element	Thermal	Atmosphere_microbial_control	Thermal	AMC	HEPA Filter Element		Thermal	AMC	HEPA Filter Element		Thermal	AMC	HEPA Filter Element	1
Catalytic Filter element	Thermal	Atmosphere_microbial_control	Thermal	AMC	Catalytic Filter element		Thermal	AMC	Catalytic Filter element		Thermal	AMC	Catalytic Filter element	1
IMV Fan	Thermal	Atmosphere_circulation	Thermal	AC	IMV Fan		Thermal	AC	IMV Fan		Thermal	AC	IMV Fan	1
IMV Valve	Thermal	Atmosphere_circulation	Thermal	AC	IMV Valve		Thermal	AC	IMV Valve		Thermal	AC	IMV Valve	1
Avionics Air Assembly	Thermal	AAA	Thermal	AAA	Avionics Air Assembly		Thermal	AAA	Avionics Air Assembly		Thermal	AAA	Avionics Air Assembly	1
			Thermal	ITCS	ITCS		Thermal	ITCS	ITCS		Thermal	ITCS	ITCS	0

[truncated: 5 more sheets: classes, references, acronyms, categories, biggest mass]
